# Supplementary material for: From thioether substituted porphyrins to sulfur linked porphyrin dimers: an unusual SNAr via thiolate displacement?
Source: Royal Society of Chemistry journal article supplement (doi:10.1039/c3cc46828c), 2013-11-11
Supplement: c3cc46828c.pdf [file c3cc46828c.pdf]

## *Electronic Supporting Information*

### **From thioether substituted porphyrins to sulfur linked porphyrin dimers: an unusual S<sub>N</sub>Ar *via* thiolate displacement?**

Aoife A. Ryan, Shane Plunkett, Aoife Casey, Thomas McCabe and Mathias O. Senge\*

#### **Table of Contents**

|                                                                                                                      |     |
|----------------------------------------------------------------------------------------------------------------------|-----|
| 1. General information.....                                                                                          | S2  |
| 2. General procedures.....                                                                                           | S2  |
| 3. Synthesis and characterisation of substrates and products .....                                                   | S3  |
| 4. Note on displacement reactions.....                                                                               | S11 |
| 5. References.....                                                                                                   | S12 |
| 6. Copies of <sup>1</sup> H NMR and <sup>13</sup> C NMR spectra.....                                                 | S13 |
| 7. Proposed mechanism of base-mediated deprotection and S <sub>N</sub> Ar to form<br>S-linked bisporphyrins.....     | S31 |
| 8. Differentiation between sulfur- and disulfide-linked bisporphyrins <i>via</i> <sup>1</sup> H NMR<br>and HRMS..... | S32 |
| 9. Crystal data for sulfur-linked bisporphyrin <b>3b</b> .....                                                       | S33 |

## 1. General information

All commercial chemicals used were of analytical grade and were supplied by Sigma Aldrich and used without further purification unless otherwise stated. 2-Ethylhexyl-3-mercaptopropionate was purchased from TCI chemicals. Anhydrous toluene was supplied by Acros chemicals.  $^1\text{H}$  and  $^{13}\text{C}$  NMR spectra were recorded on an Agilent 400-MR (400 MHz for  $^1\text{H}$  NMR; 100.6 MHz for  $^{13}\text{C}$  NMR) and/or Bruker AV 600 (600 MHz for  $^1\text{H}$  NMR; 150.9 MHz for  $^{13}\text{C}$  NMR). Chemical shifts are reported in ppm locked on the signal of  $\text{CDCl}_3$  solvent. The assignment of signals was confirmed by 2D spectra (COSY, HSQC) except for those porphyrins with low solubility. Photophysical measurements were performed in  $\text{CH}_2\text{Cl}_2$ . UV-vis absorption measurements were performed with a Specord 250 spectrophotometer. HRMS spectra were measured on MALDI-Q-ToF Premier Micromass and Micromass/Waters Corp. USA liquid chromatography time-of-flight spectrometer equipped with an electrospray ionisation source (ESI). Melting points were acquired on a Stuart SMP-10 melting point apparatus and are uncorrected. Thin layer chromatography (TLC) was performed on silica gel 60 (fluorescence indicator F254; Merck) pre-coated aluminium sheets. Flash chromatography was carried out using Fluka Silica Gel 60 (230-400 mesh). Bromoporphyrins **1a/d**<sup>1</sup>, **1b**<sup>2</sup>, **1c**<sup>3</sup>, **1e**<sup>4</sup>, **1f**<sup>5</sup>, **1g/i**<sup>6</sup> and **1h**<sup>7</sup> were synthesised by known methodologies and had analytical data consistent with the literature.

## 2. General procedures

### 2.1 General procedure A: Synthesis of thiol surrogates

A 100 mL Schlenk tube was charged with Argon to which bromoporphyrin **1a-i** (1 eq.) was added and dried under high vacuum for 30 min. Anhydrous toluene (10-20 mL) and *N,N*-diisopropylethylamine (3-5 eq.) were added and the solution was degassed *via* three freeze-pump-thaw cycles. 2-Ethylhexyl-3-mercaptopropionate (1.1 eq.), Xantphos (5-8 mol %) and  $\text{Pd}_2(\text{dba})_3$  (2.5-4 mol %) were added and the flask was heated to 110 °C for 4-24 h, monitoring the reaction *via* TLC analysis. The solution was cooled to room temperature and the solvent was removed *in vacuo*. The crude residue was dissolved in  $\text{CH}_2\text{Cl}_2$  and purified through a plug of silica. The solvents were removed *in vacuo* and the product was purified by column chromatography (silica,  $\text{CH}_2\text{Cl}_2/n$ -hexane).

### 2.2 General procedure B: Synthesis of S-linked porphyrin dimers

A 100 mL Schlenk flask was charged with Argon and the thiol surrogate porphyrin, **2a-g** was added and dissolved in anhydrous toluene (10-15 mL). NaOEt (21 % solution in EtOH, 2 eq.) was added dropwise and the mixture was stirred at ambient temperature for 4-24 h. Upon completion, the reaction mixture was poured onto  $\text{H}_2\text{O}$ . The organic layer was extracted with  $\text{CH}_2\text{Cl}_2$  and washed with  $\text{H}_2\text{O}$  (3 x 50 mL). The organic extracts were dried over  $\text{Na}_2\text{SO}_4$ , filtered and solvents were removed *in vacuo*. The residue was purified *via* filtration through a plug of silica using  $\text{CH}_2\text{Cl}_2/n$ -hexane as eluent and/or *via* column chromatography (silica,  $\text{CH}_2\text{Cl}_2/n$ -hexane). The isolated product(s) were recrystallized from  $\text{CH}_2\text{Cl}_2/\text{MeOH}$ .

### 3. Synthesis and Characterisation of Substrates and Products

#### {5-(2-Ethylhexyl-3-mercaptopropionate)-10,20-bis(4-methylphenyl)-15-phenylporphyrinato}zinc(II) **2a**:

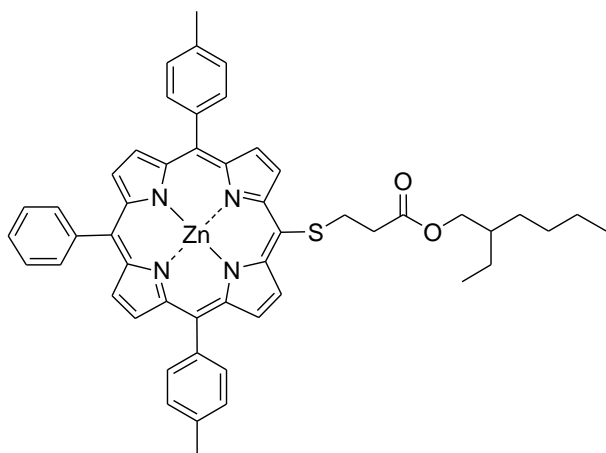

Synthesized *via* general procedure A from bromoporphyrin **1a** (110 mg, 0.155 mmol), Pd<sub>2</sub>(dba)<sub>3</sub> (4 mg, 0.004 mmol), Xantphos (5 mg, 0.008 mmol), *N,N*-diisopropylethylamine (0.465 mmol, 0.08 mL) and 2-ethylhexyl-3-mercaptopropionate (0.04 mL, 0.171 mmol) in anhydrous toluene (10 mL). The reaction was stirred at 120 °C for 24 h. Following work-up, the product was purified *via* filtration through silica plug using (*n*-hexane:CH<sub>2</sub>Cl<sub>2</sub>, 3:1 – 2:1 v/v) as eluent. Solvents were removed *in vacuo* and the residue was recrystallized from CH<sub>2</sub>Cl<sub>2</sub>/MeOH to yield **2a** as purple crystals (112 mg, 0.132 mmol, 85 %); M.p. = 135-137 °C; R<sub>f</sub> = 0.59 (CH<sub>2</sub>Cl<sub>2</sub> : *n*-hexane = 2:1, v/v); <sup>1</sup>H NMR (400 MHz, CDCl<sub>3</sub>, 25 °C): δ = 0.73 (m, 6H, alkyl-CH<sub>3</sub>), 1.12-1.30 (m, 8H, alkyl-CH<sub>2</sub>), 1.36-1.38 (m, 1H, alkyl-CH), 2.51 (t, *J* = 7.2 Hz,

2H, SCH<sub>2</sub>CH<sub>2</sub>COO), 2.71 (s, 6H, tolyl-CH<sub>3</sub>), 3.68 (t, *J* = 7.2 Hz, 2H, SCH<sub>2</sub>CH<sub>2</sub>COO), 3.80-3.83 (m, 2H, COOCH<sub>2</sub>CH), 7.55 (d, *J* = 7.8 Hz, 4H, tolyl-*o*-CH), 7.70-7.74 (m, 3H, phenyl-*o/p*-CH), 8.07 (d, *J* = 7.8 Hz, 4H, tolyl-*m*-CH), 8.16-8.18 (m, 2H, phenyl-*m*-CH), 8.71 (dd, *J* = 11.4, 4.7 Hz, 4H, *H*<sub>β</sub>), 9.03 (d, *J* = 4.7 Hz, 2H, *H*<sub>β</sub>), 10.04 ppm (d, *J* = 4.7 Hz, 2H, *H*<sub>β</sub>); <sup>13</sup>C NMR (100 MHz, CDCl<sub>3</sub>, 25 °C): δ = 10.8, 13.9, 21.5, 22.8, 23.6, 28.8, 30.2, 34.8, 37.5, 38.5, 67.0, 110.6, 121.6, 122.5, 126.5, 127.3, 127.5, 131.9, 132.2, 133.1, 134.3, 134.4, 137.2, 139.5, 142.6, 149.8, 150.7, 150.8, 154.7, 172.1 ppm; UV/Vis (CH<sub>2</sub>Cl<sub>2</sub>): λ<sub>max</sub> (log ε) = 423 (5.65), 533 (4.27), 593 nm (3.64); HRMS (MALDI) *m/z* calcd. for C<sub>51</sub>H<sub>48</sub>N<sub>4</sub>O<sub>2</sub>SZn [M]<sup>+</sup>: 844.2789, found 844.2787.

#### {5-(2-Ethylhexyl-3-mercaptopropionate)-10,15,20-triphenylporphyrinato}zinc(II) **2b**:

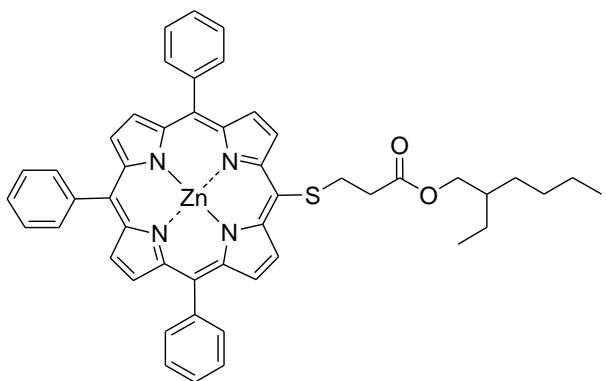

Synthesized *via* general procedure A from bromoporphyrin **1b** (200 mg, 0.294 mmol), Pd<sub>2</sub>(dba)<sub>3</sub> (8 mg, 0.008 mmol), Xantphos (9 mg, 0.016 mmol), *N,N*-diisopropylethylamine (0.15 mL, 0.883 mmol) and 2-ethylhexyl-3-mercaptopropionate (0.08 mL, 0.353 mmol) in anhydrous toluene (20 mL). The reaction was stirred at 120 °C for 24 h. Following work-up, the product was purified by column chromatography (*n*-hexane:CH<sub>2</sub>Cl<sub>2</sub>, 3:1, v/v) and recrystallized from CH<sub>2</sub>Cl<sub>2</sub>/MeOH to yield **2b** as purple crystals (183 mg, 0.224 mmol, 76 %); M.p. = 183-185 °C; R<sub>f</sub> = 0.54 (CH<sub>2</sub>Cl<sub>2</sub> : *n*-hexane = 2:1, v/v); <sup>1</sup>H NMR (400 MHz, CDCl<sub>3</sub>:pyridine-D<sub>5</sub>, 50:1, 25 °C): δ = 0.74-0.77 (m, 6H,

alkyl-CH<sub>3</sub>), 1.13-1.21 (m, 8H, alkyl-CH<sub>2</sub>), 1.37-1.41 (m, 1H, alkyl-CH), 2.37 (t, *J* = 7.3 Hz, 2H, SCH<sub>2</sub>CH<sub>2</sub>COO), 3.63 (t, *J* = 7.3 Hz, 2H, SCH<sub>2</sub>CH<sub>2</sub>COO), 3.81-3.86 (m, 2H, COOCH<sub>2</sub>CH), 7.65-7.75 (m, 9H, phenyl-*o/p*-CH), 8.13-8.16 (m, 6H, phenyl-*m*-CH), 8.77-8.81 (m, 4H, *H*<sub>β</sub>), 8.90 (d, *J* = 4.6 Hz, 2H, *H*<sub>β</sub>), 9.95 ppm (d, *J* = 4.6 Hz, 2H, *H*<sub>β</sub>); <sup>13</sup>C NMR (100 MHz, CDCl<sub>3</sub>:pyridine-D<sub>5</sub>, 50:1, 25 °C): δ = 10.8, 13.9, 22.8, 23.6, 28.8, 30.2, 34.7, 37.6, 38.5, 66.9, 109.2, 121.0, 122.3, 126.2, 126.3, 127.2, 127.8, 131.4, 131.8, 131.9, 132.7, 134.4, 134.5, 143.2, 149.7, 150.3, 150.5, 154.8, 172.1 ppm; UV/Vis (CH<sub>2</sub>Cl<sub>2</sub>): λ<sub>max</sub> (log ε) = 422 (5.70), 552 (4.32), 592 nm (3.65); HRMS (MALDI) *m/z* calcd. for C<sub>49</sub>H<sub>44</sub>N<sub>4</sub>O<sub>2</sub>SZn [M]<sup>+</sup>: 816.2476, found 816.2468.

**{5-(2-Ethylhexyl-3-mercaptopropanoate)-10,20-diphenylporphyrinato}zinc(II) 2c:**

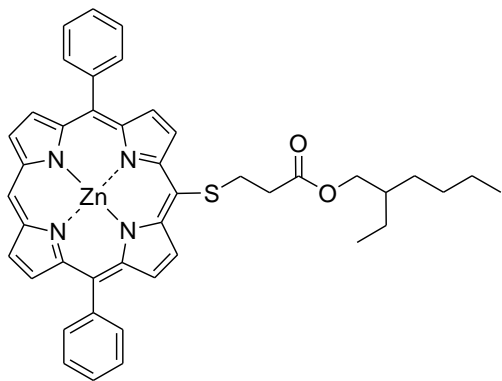

Synthesized *via* general procedure A from bromoporphyrin **1c** (130 mg, 0.228 mmol), Pd<sub>2</sub>(dba)<sub>3</sub> (6 mg, 0.007 mmol), Xantphos (7 mg, 0.012 mmol), *N,N*-diisopropylethylamine (0.12 mL, 0.693 mmol) and 2-ethylhexyl-3-mercaptopropanoate (0.06 mL, 0.277 mmol) in anhydrous toluene (15 mL). The reaction was stirred at 120 °C for 24 h. Following work-up, the product was purified *via* filtration through silica plug using (*n*-hexane:CH<sub>2</sub>Cl<sub>2</sub>, 3:1 – 2:1 v/v) as eluent. Solvents were removed *in vacuo* and the residue was recrystallized from CH<sub>2</sub>Cl<sub>2</sub>/MeOH to yield a purple solid **2c** (130 mg, 0.175 mmol, 76 %); M.p. = 190-191 °C; R<sub>f</sub> = 0.43 (CH<sub>2</sub>Cl<sub>2</sub> : *n*-hexane = 2:1, v/v); <sup>1</sup>H NMR (600 MHz, CDCl<sub>3</sub>, 25 °C): δ = 0.73-0.81 (m, 6H, alkyl-CH<sub>3</sub>), 1.12-1.30 (m, 8H, alkyl-CH<sub>2</sub>), 1.37-1.40

(m, 1H, alkyl-CH) 2.46 (t, *J* = 7.1 Hz, 2H, SCH<sub>2</sub>CH<sub>2</sub>COO), 3.65 (t, *J* = 7.1 Hz, 2H, SCH<sub>2</sub>CH<sub>2</sub>COO), 3.75-3.80 (m, 2H, COOCH<sub>2</sub>CH), 7.79-7.84 (m, 6H, phenyl-CH), 8.23 (d, *J* = 7.1 Hz, 4H, phenyl-*o*-CH), 9.02 (d, *J* = 4.2 Hz, 2H, *H*<sub>β</sub>), 9.03 (d, *J* = 4.2 Hz, 2H, *H*<sub>β</sub>), 9.30 (d, *J* = 4.2 Hz, 2H, *H*<sub>β</sub>), 10.07 (d, *J* = 4.7 Hz, 2H, *H*<sub>β</sub>), 10.13 ppm (s, 1H, *H*<sub>meso</sub>); <sup>13</sup>C NMR (150 MHz, CDCl<sub>3</sub>, 25 °C): δ = 10.8, 13.8, 22.9, 23.5, 28.7, 30.1, 34.8, 37.5, 38.5, 67.0, 107.2, 108.0, 111.3, 120.9, 126.6, 127.6, 131.9, 132.3, 132.4, 132.9, 134.5, 142.4, 149.4, 150.4, 150.6, 154.3, 172.0 ppm; UV/Vis (CH<sub>2</sub>Cl<sub>2</sub>): λ<sub>max</sub> (log ε) = 416 (5.52), 546 nm (4.20); HRMS (MALDI) *m/z* calcd. for C<sub>43</sub>H<sub>40</sub>N<sub>4</sub>O<sub>2</sub>SZn [M<sup>+</sup>]: 740.2163, found 740.2185.

**5-(2-Ethylhexyl-3-mercaptopropanoate)-10,20-bis(4-methylphenyl)-15-phenylporphyrin 2d:** Synthesized

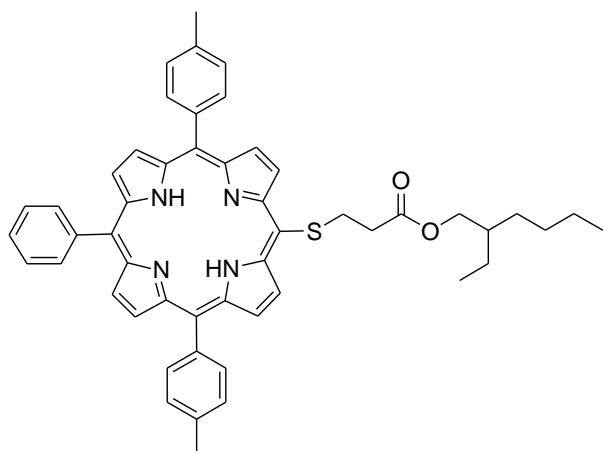

*via* general procedure A from bromoporphyrin **1d** (200 mg, 0.310 mmol), Pd<sub>2</sub>(dba)<sub>3</sub> (10 mg, 0.011 mmol), Xantphos (15 mg, 0.026 mmol), *N,N*-diisopropylethylamine (0.21 mL, 1.241 mmol) and 2-ethylhexyl-3-mercaptopropanoate (0.08 mL, 0.341 mmol) in anhydrous toluene (20 mL). The reaction was stirred at 120 °C for 24 h. Following work-up, the product was purified *via* filtration through silica plug using (*n*-hexane:CH<sub>2</sub>Cl<sub>2</sub>, 3:1 – 2:1 v/v) as eluent. Solvents were removed *in vacuo* and the residue was recrystallized from CH<sub>2</sub>Cl<sub>2</sub>/MeOH to yield **2d** as purple crystals (169 mg, 0.215 mmol, 70 %); M.p. = 160-161 °C; R<sub>f</sub> = 0.68 (CH<sub>2</sub>Cl<sub>2</sub> : *n*-hexane = 1:1, v/v); <sup>1</sup>H NMR (400 MHz, CDCl<sub>3</sub>, 25 °C): δ = -2.74 (s, 2H, N-H) 0.74-0.77 (m, 6H, alkyl-CH<sub>3</sub>), 1.11-1.12 (m,

8H, alkyl-CH<sub>2</sub>), 1.39-1.40 (m, 1H, alkyl-CH), 2.49 (t, *J* = 7.2 Hz, 2H, SCH<sub>2</sub>CH<sub>2</sub>COO), 2.72 (s, 6H, tolyl-CH<sub>3</sub>), 3.69 (t, *J* = 7.2 Hz, 2H, SCH<sub>2</sub>CH<sub>2</sub>COO), 3.84-3.87 (m, 2H, COOCH<sub>2</sub>CH), 7.56 (d, *J* = 7.7 Hz, 4H, tolyl-*o*-CH), 7.71-7.78 (m, 3H, phenyl-*o/p*-CH), 8.08 (d, *J* = 7.7 Hz, 4H, tolyl-*m*-CH), 8.16-8.18 (m, 2H, phenyl-*m*-CH), 8.78-8.82 (m, 4H, *H*<sub>β</sub>), 8.95 (d, *J* = 4.7 Hz, 2H, *H*<sub>β</sub>), 9.93 ppm (d, *J* = 4.7 Hz, 2H, *H*<sub>β</sub>); <sup>13</sup>C NMR (100 MHz, CDCl<sub>3</sub>, 25 °C): δ = 10.8, 13.9, 21.5, 22.8, 23.5, 28.8, 30.2, 34.7, 37.4, 38.5, 67.0, 109.5, 120.7, 121.7, 126.7, 127.4, 127.8, 134.4, 134.5, 137.5, 139.0, 141.9, 172.0 ppm; UV/Vis (CH<sub>2</sub>Cl<sub>2</sub>): λ<sub>max</sub> (log ε) = 421 (5.56), 519 (4.19), 555 (3.89), 595 (3.70), 650 nm (3.54); HRMS (ESI) *m/z* calcd. for C<sub>51</sub>H<sub>51</sub>N<sub>4</sub>O<sub>2</sub>S [M+H]<sup>+</sup>: 783.3733, found 783.3732.

**5-(2-Ethylhexyl-3-mercaptopropionate)-10,20-bis(4-methylphenyl)porphyrin 2e.** Synthesized *via* general

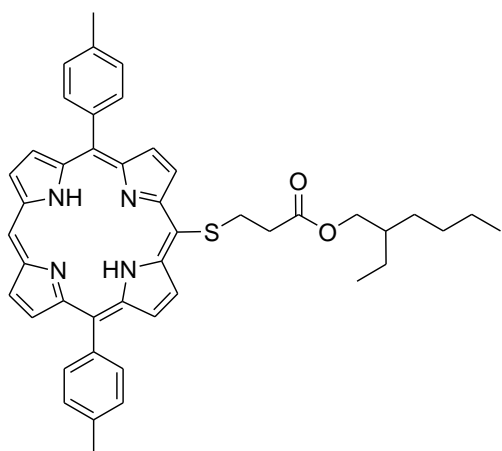

procedure A from bromoporphyrin **1e** (130 mg, 0.228 mmol), Pd<sub>2</sub>(dba)<sub>3</sub> (6 mg, 0.007 mmol), Xantphos (8 mg, 0.014 mmol), *N,N*-diisopropylethylamine (0.12 mL, 0.684 mmol) and 2-ethylhexyl-3-mercaptopropionate (0.06 mL, 0.274 mmol) in anhydrous toluene (15 mL). The reaction was stirred at 120 °C for 24 h. Following work-up, the product was purified *via* filtration through silica plug using (*n*-hexane:CH<sub>2</sub>Cl<sub>2</sub>, 3:1 – 2:1 v/v) as eluent. Solvents were removed *in vacuo* and the residue was recrystallized from CH<sub>2</sub>Cl<sub>2</sub>/MeOH to yield purple crystals **2e** (109 mg, 0.154 mmol, 68 %); M.p. = 175-177 °C; R<sub>f</sub> = 0.72 (CH<sub>2</sub>Cl<sub>2</sub> : *n*-hexane = 1:1, v/v); <sup>1</sup>H NMR (400 MHz, CDCl<sub>3</sub>, 25 °C): δ = -3.03 (s, 2H, NH), 0.71-0.79 (m, 6H, alkyl-CH<sub>3</sub>), 1.09-1.15 (m, 8H, alkyl-CH<sub>2</sub>), 1.35-1.37 (m, 1H, alkyl-CH) 2.48 (t, *J* = 7.2 Hz, 2H, SCH<sub>2</sub>CH<sub>2</sub>COO), 2.74 (s, 6H,

tolyl-CH<sub>3</sub>), 3.34 (t, *J* = 7.4 Hz, 2H, SCH<sub>2</sub>CH<sub>2</sub>COO), 3.84-8.87 (m, 2H, COOCH<sub>2</sub>CH), 7.60 (d, *J* = 7.7 Hz, 4H, tolyl-*o*-CH), 8.12 (d, *J* = 7.7 Hz, 4H, tolyl-*m*-CH), 8.99-9.02 (m, 4H, H<sub>β</sub>), 9.30 (d, *J* = 4.6 Hz, 2H, H<sub>β</sub>), 10.03 (d, *J* = 4.9 Hz, 2H, H<sub>β</sub>), 10.21 ppm (s, 1H, H<sub>meso</sub>); <sup>13</sup>C NMR (100 MHz, CDCl<sub>3</sub>): δ = 10.8, 13.9, 21.5, 22.3, 22.8, 23.5, 28.8, 30.2, 34.7, 37.6, 38.5, 67.0, 106.3, 110.2, 120.2, 127.6, 131.4, 132.1, 135.6, 137.5, 138.6, 172.0 ppm; UV/Vis (CH<sub>2</sub>Cl<sub>2</sub>): λ<sub>max</sub> (log ε) = 417 (5.60), 513 (4.29), 548 (3.76), 588 (3.78), 642 nm (3.33); HRMS (MALDI) *m/z* calcd. for [C<sub>45</sub>H<sub>46</sub>N<sub>4</sub>O<sub>2</sub>S](M<sup>+</sup>): 706.3341, found 706.3347.

**{5-(2-Ethylhexyl-3-mercaptopropionate)-10,20-bis(4-methylphenyl)porphyrinato}nickel(II) 2f:**

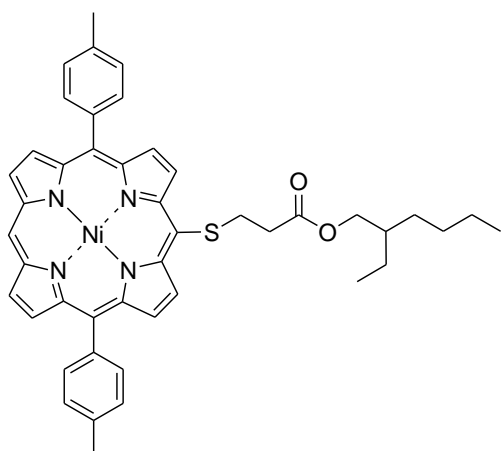

Synthesized *via* general procedure A from bromoporphyrin **1f** (200 mg, 0.319 mmol), Pd<sub>2</sub>(dba)<sub>3</sub> (14 mg, 0.016 mmol), Xantphos (19 mg, 0.032 mmol), *N,N*-diisopropylethylamine (0.17 mL, 0.958 mmol) and 2-ethylhexyl-3-mercaptopropionate (0.15 mL, 0.641 mmol) in anhydrous toluene (20 mL). The product was purified by column chromatography (*n*-hexane:CH<sub>2</sub>Cl<sub>2</sub>, 2:1, v/v) and recrystallized (CH<sub>2</sub>Cl<sub>2</sub>/MeOH) to yield purple crystals **2f** (175 mg, 0.230 mmol, 72%); M.p. 138-140 °C; R<sub>f</sub> = 0.31 (CH<sub>2</sub>Cl<sub>2</sub> : *n*-hexane = 1:1, v/v); <sup>1</sup>H NMR (400 MHz, CDCl<sub>3</sub>, 25 °C): δ = 0.69-0.77 (m, 6H, alkyl-CH<sub>3</sub>), 1.09-1.15 (m, 9H, alkyl-CH<sub>2</sub>/CH), 2.22 (t, *J* = 7.2 Hz, 2H, SCH<sub>2</sub>CH<sub>2</sub>COO), 2.66 (s, 6H, tolyl-CH<sub>3</sub>), 3.34 (t, *J* = 7.2 Hz, 2H, SCH<sub>2</sub>CH<sub>2</sub>COO), 3.77-3.79 (m, 2H, COOCH<sub>2</sub>CH), 7.48 (d, *J* = 7.7 Hz, 4H, tolyl-*o*-CH), 7.87 (d, *J* = 7.7 Hz, 4H, tolyl-*m*-CH), 8.83-

8.86 (m, 4H, H<sub>β</sub>), 9.06 (d, *J* = 4.9 Hz, 2H, H<sub>β</sub>), 9.74 ppm (s, 1H, H<sub>meso</sub>), 9.82 ppm (d, *J* = 4.9 Hz, 2H, H<sub>β</sub>); <sup>13</sup>C NMR (100 MHz, CDCl<sub>3</sub>, 25 °C): δ = 10.8, 13.9, 21.5, 22.8, 23.5, 28.7, 30.1, 34.7, 35.8, 38.5, 66.9, 105.5, 109.5, 118.9, 127.6, 132.3, 132.4, 132.6, 133.2, 133.6, 137.5, 137.6, 142.4, 143.0, 143.2, 146.5 and 171.8 ppm; UV/Vis (CH<sub>2</sub>Cl<sub>2</sub>): λ<sub>max</sub> (log ε) = 413 (5.45), 526 (4.30), 556 nm (3.98); HRMS (MALDI) *m/z* calcd. for C<sub>45</sub>H<sub>60</sub>N<sub>4</sub>NiO<sub>2</sub>S [M]<sup>+</sup>: 762.2546, found 762.2538.

**{5-(2-Ethylhexyl-3-mercaptopropionate)-10,20-bis(4-methylphenyl)-15-phenylporphyrinato}nickel(II) 2g:**

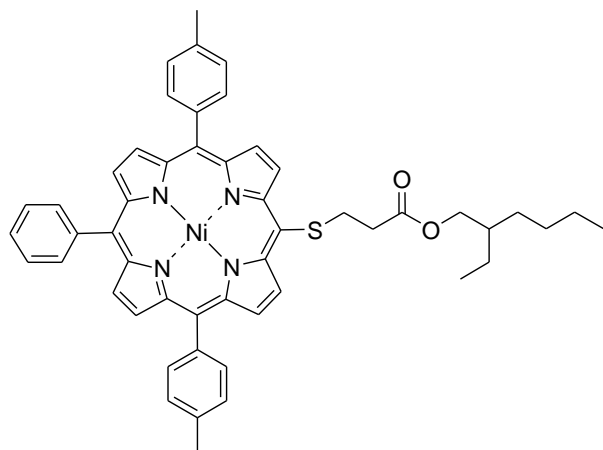

Synthesized *via* general procedure A from bromoporphyrin **1g** (250 mg, 0.355 mmol), Pd<sub>2</sub>(dba)<sub>3</sub> (16 mg, 0.018 mmol), Xantphos (21 mg, 0.036 mmol), *N,N*-diisopropylethylamine (0.18 mL, 1.067 mmol) and 2-ethylhexyl-3-mercaptopropionate (0.16 mL, 0.710 mmol) in anhydrous toluene (20 mL). Product purified by column chromatography (*n*-hexane:CH<sub>2</sub>Cl<sub>2</sub>, 3:1, v/v) and recrystallized (CH<sub>2</sub>Cl<sub>2</sub>/MeOH) to yield purple crystals **2g** (190 mg, 0.226 mmol, 63%); M.p. = 154-156 °C; R<sub>f</sub> = 0.50 (CH<sub>2</sub>Cl<sub>2</sub> : *n*-



hexane = 1:1, v/v);  $^1\text{H}$  NMR (400 MHz,  $\text{CDCl}_3$ , 25 °C):  $\delta$  = 0.72-0.80 (m, 6H, alkyl- $\text{CH}_3$ ), 1.11-1.30 (m, 9H, alkyl- $\text{CH}_2/\text{CH}$ ), 2.21 (t,  $J$  = 7.2 Hz, 2H,  $\text{SCH}_2\text{CH}_2\text{COO}$ ), 2.65 (s, 6H, tolyl- $\text{CH}_3$ ), 3.32 (t,  $J$  = 7.2 Hz, 2H,  $\text{SCH}_2\text{CH}_2\text{COO}$ ), 3.80-3.82 (m, 2H,  $\text{COOCH}_2\text{CH}$ ), 7.47 (d,  $J$  = 7.7 Hz, 4H, tolyl- $o$ -CH), 7.64-7.67 (m, 3H, phenyl- $o/p$ -CH), 7.87 (d,  $J$  = 7.7 Hz, 4H, tolyl- $m$ -CH), 7.96-7.99 (m, 2H, phenyl- $m$ -CH), 8.69-8.73 (m, 4H,  $H_\beta$ ), 8.83 (d,  $J$  = 4.9 Hz, 2H,  $H_\beta$ ), 9.78 ppm (d,  $J$  = 4.9 Hz, 2H,  $H_\beta$ );  $^{13}\text{C}$  NMR (100 MHz,  $\text{CDCl}_3$ , 25 °C):  $\delta$  = 10.8, 13.9, 21.5, 22.8, 23.5, 28.8, 30.2, 34.7, 35.6, 38.5, 66.9, 108.9, 119.3, 120.0, 126.9, 127.6, 127.7, 127.8, 132.2, 132.4, 132.5, 133.3, 133.5, 133.6, 137.5, 140.6, 142.3, 143.0, 146.7, 171.8 ppm; UV/Vis ( $\text{CH}_2\text{Cl}_2$ ):  $\lambda_{\text{max}}$  (log  $\epsilon$ ) = 419 (5.39), 535 (4.27), 565 nm (3.88); HRMS (MALDI)  $m/z$  calcd. for  $\text{C}_{51}\text{H}_{48}\text{N}_4\text{NiO}_2\text{S}$   $[\text{M}]^+$ : 838.2851, found 838.2833.

**{5-(2-Ethylhexyl-3-mercaptopropionate)-10,15,20-triphenylporphyrinato}nickel(II) 2h:** Synthesized *via*

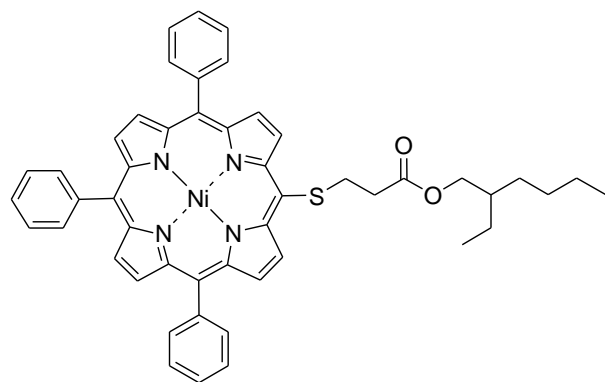

general procedure A from bromoporphyrin **1h** (200 mg, 0.296 mmol),  $\text{Pd}_2(\text{dba})_3$  (14 mg, 0.015 mmol), Xantphos (18 mg, 0.030 mmol), *N,N*-diisopropylethylamine (0.16 mL, 0.889 mmol) and 2-ethylhexyl-3-mercaptopropionate (0.14 mL, 0.592 mmol) in anhydrous toluene (20 mL). Product purified by column chromatography (*n*-hexane: $\text{CH}_2\text{Cl}_2$ , 3:1, v/v) and recrystallized ( $\text{CH}_2\text{Cl}_2/\text{MeOH}$ ) to yield **2h** as purple crystals (165 mg, 0.204 mmol, 68%); M.p. = 166-167 °C;  $R_f$  = 0.44 ( $\text{CH}_2\text{Cl}_2$  : *n*-hexane = 1:1, v/v);  $^1\text{H}$  NMR (400 MHz,  $\text{CDCl}_3$ , 25 °C):  $\delta$  = 0.69-0.77 (m, 6H, alkyl- $\text{CH}_3$ ), 1.11-1.33 (m, 9H, alkyl- $\text{CH}_2/\text{CH}$ ), 2.20 (t,  $J$  = 7.2 Hz, 2H,  $\text{SCH}_2\text{CH}_2\text{COO}$ ), 3.30

(t,  $J$  = 7.2 Hz, 2H,  $\text{SCH}_2\text{CH}_2\text{COO}$ ), 3.78-3.82 (m, 2H,  $\text{COOCH}_2\text{CH}$ ), 7.64-7.67 (m, 9H, phenyl- $o/p$ -CH), 7.96-7.98 (m, 6H, phenyl- $m$ -CH), 8.68-8.69 (m, 4H,  $H_\beta$ ), 8.79 (d,  $J$  = 4.9 Hz, 2H,  $H_\beta$ ), 9.78 ppm (d,  $J$  = 4.9 Hz, 2H,  $H_\beta$ );  $^{13}\text{C}$  NMR (100 MHz,  $\text{CDCl}_3$ , 25 °C):  $\delta$  = 10.8, 13.9, 22.8, 23.5, 28.7, 30.1, 34.7, 35.6, 38.5, 66.9, 109.1, 119.2, 120.1, 126.8, 126.9, 127.8, 132.2, 132.5, 132.6, 133.3, 133.5, 133.6, 140.4, 140.5, 142.3, 142.8, 146.7, 171.8 ppm; UV/Vis ( $\text{CH}_2\text{Cl}_2$ ):  $\lambda_{\text{max}}$  (log  $\epsilon$ ) = 418 (5.42), 534 (4.27), 566 nm (3.84); HRMS (MALDI)  $m/z$  calcd. for  $\text{C}_{49}\text{H}_{44}\text{N}_4\text{NiO}_2\text{S}$   $[\text{M}]^+$ : 810.2538, found 810.2545.

**{5-Butyl-10,20-bis(2-ethylpropyl)-15-(2-ethylhexyl-3-mercaptopropionate)porphyrinato}nickel(II) 2i:**

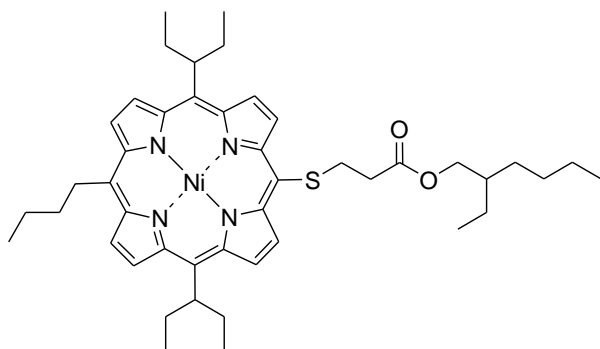

Synthesized *via* general procedure A from bromoporphyrin **1i** (200 mg, 0.321 mmol),  $\text{Pd}_2(\text{dba})_3$  (14 mg, 0.016 mmol), Xantphos (18 mg, 0.032 mmol), *N,N*-diisopropylethylamine (0.17 mL, 0.963 mmol) and 2-ethylhexyl-3-mercaptopropionate (0.14 mL, 0.620 mmol) in anhydrous toluene (20 mL). Product purified by column chromatography (*n*-hexane: $\text{CH}_2\text{Cl}_2$ , 5:1, v/v) and recrystallized ( $\text{CH}_2\text{Cl}_2/\text{MeOH}$ ) to yield **2i** as purple crystals (159 mg, 0.206 mmol, 65%); M.p. = 137-138 °C;  $R_f$  = 0.53 ( $\text{CH}_2\text{Cl}_2$  : *n*-hexane = 1:1, v/v);  $^1\text{H}$  NMR (400 MHz,  $\text{CDCl}_3$ , 25 °C):  $\delta$  = 0.73-0.81 (m, 6H,

ethylhexyl- $\text{CH}_3$ ), 0.90 (t,  $J$  = 7.4 Hz, 12H, ethylpropyl- $\text{CH}_3$ ), 1.01 (t,  $J$  = 7.8 Hz, 3H, butyl- $\text{CH}_3$ ), 1.15-1.20 (m, 9H, ethylhexyl- $\text{CH}_2/\text{CH}$ ), 1.50-1.56 (m, 2H, butyl- $\text{CH}_2\text{CH}_2\text{CH}_3$ ), 2.13-2.19 (m, 4H,  $\text{SCH}_2\text{CH}_2\text{COO}$ /butyl- $\text{CH}_2\text{CH}_2\text{CH}_2$ ), 2.59-2.67 (m, 8H, ethylpropyl- $\text{CH}_2$ ), 3.16 (t, 2H,  $J$  = 7.2 Hz,  $\text{SCH}_2\text{CH}_2\text{COO}$ ), 3.82-3.84 (m, 2H,  $\text{COOCH}_2\text{CH}$ ), 4.24-4.27 (m, 2H, ethylpropyl-CH), 4.45 (t,  $J$  = 7.6 Hz, 2H, butyl- $\text{CH}_2\text{CH}_2\text{CH}_2$ ), 9.21 (d,  $J$  = 5.1 Hz, 2H,  $H_\beta$ ), 9.31 (d,  $J$  = 5.1 Hz, 4H,  $H_\beta$ ), 9.63 ppm (d,  $J$  = 5.1 Hz, 2H,  $H_\beta$ );  $^{13}\text{C}$  NMR (100 MHz,  $\text{CDCl}_3$ , 25 °C):  $\delta$  = 10.8, 13.9, 22.8, 23.3, 23.5, 28.8, 30.2, 33.5, 33.6, 34.7, 34.9, 38.5, 39.1, 49.3, 66.9, 106.8, 119.0, 121.1, 130.0, 130.8, 131.7, 132.5, 139.9, 141.7, 144.5, 171.9 ppm; UV/Vis ( $\text{CH}_2\text{Cl}_2$ ):  $\lambda_{\text{max}}$  (log  $\epsilon$ ) = 423 (5.35), 546 (4.20), 583 nm (3.69); HRMS (MALDI)  $m/z$  calcd. for  $\text{C}_{45}\text{H}_{60}\text{N}_4\text{NiO}_2\text{S}$   $[\text{M}]^+$ : 778.3790, found 778.3821.

**[Bis{10,20-bis(4-methylphenyl)-15-phenyl-porphyrinato-5-yl}zinc(II)]sulfide 3a.** Synthesized *via* general

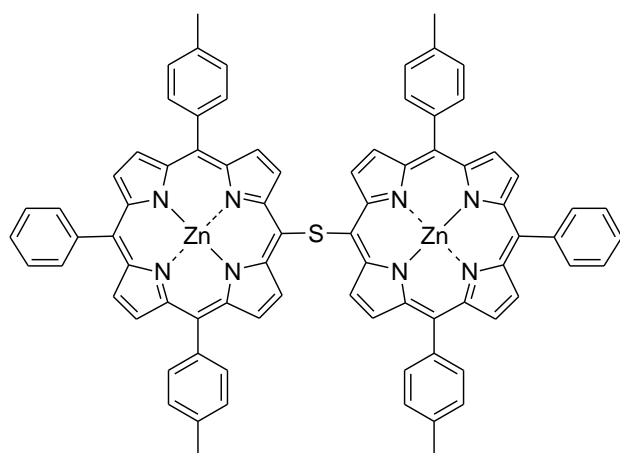

procedure B from thiol surrogate **2a** (50 mg, 0.059 mmol) and NaOEt (21% solution, 0.1 mL) in anhydrous toluene (15 mL). Product purified by column chromatography (*n*-hexane:CH<sub>2</sub>Cl<sub>2</sub>, 1:1, v/v) and recrystallized (CH<sub>2</sub>Cl<sub>2</sub>/*n*-hexane) to yield purple crystals (24 mg, 0.019 mmol, 63 %); M.p. > 300 °C; R<sub>f</sub> = 0.57 (CH<sub>2</sub>Cl<sub>2</sub> : *n*-hexane = 1:1, v/v); <sup>1</sup>H NMR (400 MHz, CDCl<sub>3</sub>: pyridine-d<sub>5</sub>, 30:1, 25 °C): δ = 2.56 (s, 12H, tolyl-CH<sub>3</sub>), 7.33 (d, *J* = 7.8 Hz, 8H, tolyl-*o*-CH), 7.63-7.67 (m, 6H, phenyl-*o/p*-CH), 7.82 (d, *J* = 7.7 Hz, 8H, tolyl-*m*-CH), 8.10 (d, *J* = 7.4 Hz, 4H, phenyl-*m*-CH), 8.52 (d, *J* = 4.7 Hz, 4H, *H*<sub>β</sub>), 8.65 (d, *J* = 4.7 Hz, 4H, *H*<sub>β</sub>), 8.69 (d, *J* = 4.7 Hz, 4H, *H*<sub>β</sub>), 10.35 ppm (d, *J* = 4.8 Hz, 4H, *H*<sub>β</sub>); <sup>13</sup>C NMR (100 MHz, CDCl<sub>3</sub>, 25 °C): δ = 21.3, 107.5, 120.0,

120.8, 121.4, 126.2, 126.8, 127.1, 131.3, 131.4, 132.9, 134.1, 134.3, 136.6, 140.2, 143.3, 149.4, 149.8, 150.4, 153.9 ppm; UV/Vis (CH<sub>2</sub>Cl<sub>2</sub>): λ<sub>max</sub> (log ε) = 410 (5.44), 419 (5.41), 566 (4.47), 621 nm (4.52); HRMS (MALDI) *m/z* calcd. for C<sub>80</sub>H<sub>54</sub>N<sub>8</sub>SZn<sub>2</sub> [M]<sup>+</sup>: 1286.2775, found 1286.2770.

**[Bis{10,15,20-triphenyl-porphyrinato-5-yl}zinc(II)]sulfide 3b.** Synthesized *via* general procedure B from

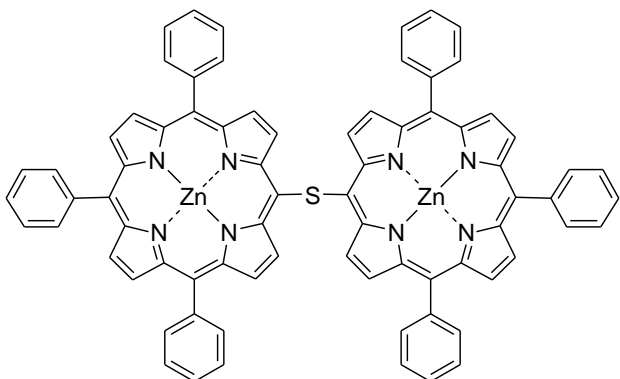

thiol surrogate **2b** (50 mg, 0.061 mmol) and NaOEt (21% solution, 0.15 mL) in anhydrous toluene (15 mL). Following aqueous work-up, the product was purified by filtration through a silica plug using *n*-hexane:CH<sub>2</sub>Cl<sub>2</sub>, (2:1-1:1, v/v) as eluent and recrystallized from CH<sub>2</sub>Cl<sub>2</sub>/MeOH to yield purple crystals (21 mg, 0.016 mmol, 56%); M.p. > 300 °C; R<sub>f</sub> = 0.46 (CH<sub>2</sub>Cl<sub>2</sub> : *n*-hexane = 1:1, v/v); <sup>1</sup>H NMR (400 MHz, CDCl<sub>3</sub>: pyridine-d<sub>5</sub>, 50:1, 25 °C): δ = 7.51-7.58 (m, 12H, phenyl-*o/p*-CH), 7.63-7.67 (m, 6H, phenyl-*o/p*-CH), 7.94 (d, *J* = 7.3 Hz, m, 8H, phenyl-*m*-CH), 8.10 (d, *J* = 7.3 Hz, m, 4H, phenyl-*m*-CH), 8.49 (d, *J* = 4.6 Hz, 4H, *H*<sub>β</sub>), 8.62 (d, *J* = 4.2 Hz, 4H, *H*<sub>β</sub>),

8.70 (d, *J* = 4.2 Hz, 4H, *H*<sub>β</sub>), 10.33 ppm (d, *J* = 4.6 Hz, 4H, *H*<sub>β</sub>); <sup>13</sup>C NMR (100 MHz, CDCl<sub>3</sub>, 25 °C): δ = 106.3, 116.8, 117.1, 120.3, 120.7, 121.6, 126.1, 126.2, 127.0, 127.2, 131.4, 131.6, 131.9, 132.9, 134.2, 134.3, 143.2, 149.3, 149.9, 150.3, 153.8 ppm; UV/Vis (CH<sub>2</sub>Cl<sub>2</sub>): λ<sub>max</sub> (log ε) = 410 (5.34), 420 (5.34), 564 (4.72), 625 nm (4.74); HRMS (MALDI) *m/z* calcd. for C<sub>76</sub>H<sub>46</sub>N<sub>8</sub>SZn<sub>2</sub> [M]<sup>+</sup>: 1230.2149, found 1230.2196.

**[Bis{10,20-bis(4-methylphenyl)porphyrinato-5-yl}zinc(II)]sulfide 3c:** Synthesized *via* general procedure B

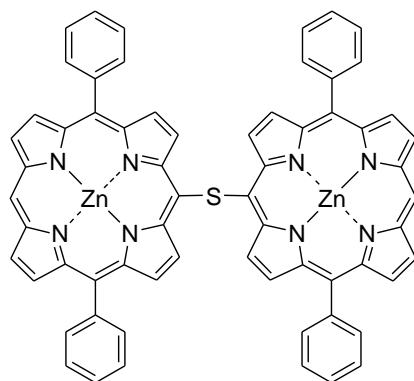

from thiol surrogate **2c** (40 mg, 0.054 mmol) and NaOEt (21% solution, 0.15 mL) in anhydrous toluene (15 mL). Product purified by column chromatography (*n*-hexane:CH<sub>2</sub>Cl<sub>2</sub>, 2-1-1:1, v/v) and recrystallized (CH<sub>2</sub>Cl<sub>2</sub>/MeOH) to yield a purple solid **3c** (16 mg, 0.015 mmol, 55 %); M.p. > 300 °C; R<sub>f</sub> = 0.56 (CH<sub>2</sub>Cl<sub>2</sub> : *n*-hexane = 2:1, v/v); <sup>1</sup>H NMR (600 MHz, CDCl<sub>3</sub>: pyridine-d<sub>5</sub>, 50:1, 25 °C): δ = 7.55-7.59 (m, 8H, phenyl-CH), 7.61-7.64 (m, 4H, phenyl-CH), 7.99 (d, *J* = 7.1 Hz, m, 8H, phenyl-*o*-CH), 8.55 (d, *J* = 4.6 Hz, 4H, *H*<sub>β</sub>), 8.82 (d, *J* = 4.4 Hz, 4H, *H*<sub>β</sub>), 9.21 (d, *J* = 4.4 Hz, 4H, *H*<sub>β</sub>), 10.03 (s, 2H, *H*<sub>meso</sub>), 10.38 ppm (d, *J* = 4.6 Hz, 4H, *H*<sub>β</sub>); <sup>13</sup>C NMR (150 MHz CDCl<sub>3</sub>: pyridine-d<sub>5</sub>, 50:1, 25 °C): δ = 106.4, 120.2, 120.9, 126.1, 127.0, 131.4, 131.9, 132.0, 132.8, 134.1, 134.3, 149.7, 150.3, 153.5 ppm; UV/Vis (CH<sub>2</sub>Cl<sub>2</sub>): λ<sub>max</sub> (log ε) = 416[br] (5.31), 559 (4.42), 612 nm (4.23); HRMS

(MALDI) *m/z* calcd. for C<sub>64</sub>H<sub>38</sub>N<sub>8</sub>SZn<sub>2</sub> [M]<sup>+</sup>: 1078.1523, found 1078.1522.

**[Bis{10,20-bis(4-methylphenyl)porphyrinato-5-yl}nickel(II)]sulfide 3f:** Synthesized *via* general procedure

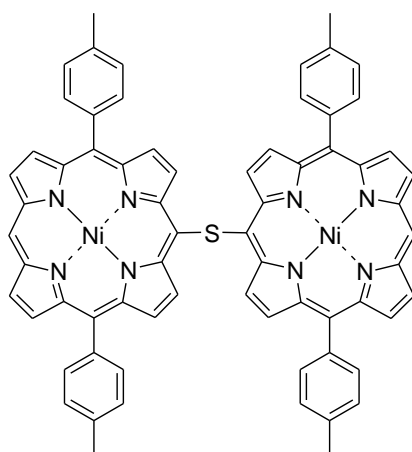

B from thiol surrogate **2f** (50 mg, 0.065 mmol) and NaOEt (21% solution, 0.1 mL) in anhydrous toluene (15 mL). Product purified by column chromatography (*n*-hexane:CH<sub>2</sub>Cl<sub>2</sub>, 1:1, v/v) and recrystallized (CH<sub>2</sub>Cl<sub>2</sub>/*n*-hexane) to yield purple crystals (0.023 mmol, 26 mg, 72 %); M.p. > 300 °C; R<sub>f</sub> = 0.52 (CH<sub>2</sub>Cl<sub>2</sub> : *n*-hexane = 1:1, v/v); <sup>1</sup>H NMR (400 MHz, CDCl<sub>3</sub>, 25 °C): δ = 2.52 (s, 12H, tolyl-CH<sub>3</sub>), 7.27 (d, *J* = 7.6 Hz, 8H, tolyl-*o*-CH), 7.57 (d, *J* = 7.7 Hz, 8H, tolyl-*m*-CH), 8.47 (d, *J* = 5.0 Hz, 4H, *H*<sub>β</sub>), 8.56 (d, *J* = 4.7 Hz, 4H, *H*<sub>β</sub>), 8.79 (d, *J* = 4.7 Hz, 4H, *H*<sub>β</sub>), 9.43 ppm (s, 2H, *H*<sub>meso</sub>), 9.79 ppm (d, *J* = 5.0 Hz, 4H, *H*<sub>β</sub>); <sup>13</sup>C NMR (100 MHz, CDCl<sub>3</sub>, 25 °C): δ = 21.3, 104.9, 115.4, 118.6, 127.4, 131.7, 131.9, 132.3, 133.4, 133.5, 137.2, 137.3, 142.1, 142.7, 144.8 ppm; UV/Vis (CH<sub>2</sub>Cl<sub>2</sub>): λ<sub>max</sub> (log ε) = 405 (4.92), 452[sh] (4.59), 539 (3.66), 587 nm (3.66); HRMS (MALDI) *m/z* calcd. for C<sub>68</sub>H<sub>46</sub>N<sub>8</sub>Ni<sub>2</sub>S [M]<sup>+</sup>: 1122.2273, found 1122.2277.

**[Bis{10,20-bis(4-methylphenyl)-15-phenylporphyrinato-5-yl}nickel(II)]sulfide 3g:** Synthesized *via* general

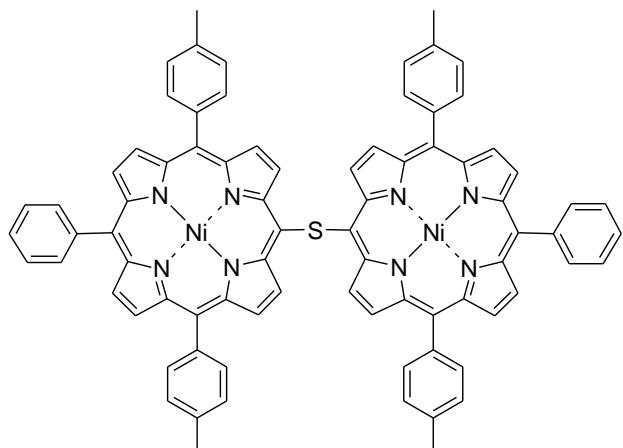

procedure B from thiol surrogate **2g** (50 mg, 0.060 mmol) and NaOEt (21% solution, 0.1 mL) in anhydrous toluene (15 mL). Product purified by column chromatography (*n*-hexane:CH<sub>2</sub>Cl<sub>2</sub>, 5:2, v/v) and recrystallized (CH<sub>2</sub>Cl<sub>2</sub>/*n*-hexane) to yield purple crystals (0.020 mmol, 26 mg, 68 %); M.p. > 300 °C; R<sub>f</sub> = 0.27 (CH<sub>2</sub>Cl<sub>2</sub> : *n*-hexane = 2:5, v/v); <sup>1</sup>H NMR (400 MHz, CDCl<sub>3</sub>, 25 °C): δ = 2.53 (s, 12H, tolyl-CH<sub>3</sub>), 7.30 (d, *J* = 7.4 Hz, 8H, tolyl-*o*-CH), 7.57-7.62 (m, 14H, tolyl-*m*-CH/phenyl-*o/p*-CH), 7.84-7.85 (m, 4H, phenyl-*m*-CH), 8.48-8.51 (m, 12H, *H*<sub>β</sub>), 9.75 ppm (d, *J* = 4.8 Hz, 4H, *H*<sub>β</sub>); <sup>13</sup>C NMR (100 MHz, CDCl<sub>3</sub>, 25 °C): δ = 21.3, 119.0, 119.5, 126.8, 127.4, 127.6, 131.8, 132.0, 132.1, 133.4, 133.5, 133.6, 137.2, 137.3, 140.4, 141.9, 142.0, 142.7 and 145.1 ppm; UV/Vis (CH<sub>2</sub>Cl<sub>2</sub>): λ<sub>max</sub> (log ε) = 409 (5.44), 457[sh]

(5.06), 547 (4.55), 596 nm (4.21); HRMS (MALDI) *m/z* calcd. for C<sub>80</sub>H<sub>54</sub>N<sub>8</sub>Ni<sub>2</sub>S [M]<sup>+</sup>: 1274.2899, found 1274.2947.

**{5,15-Bis(4-methylphenyl)-10-methylthio-20-phenylporphyrinato}zinc(II) 4a:** Thiol surrogate **2a** (50 mg,

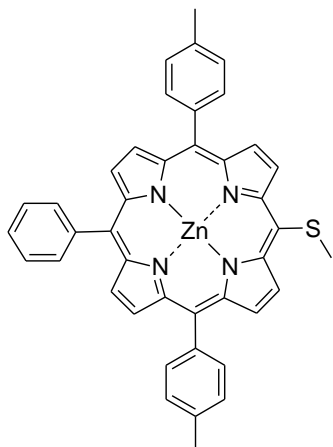

0.059 mmol) was dissolved in anhydrous toluene (15 mL) together with methyl iodide (0.08 mL, 1.3 mmol) in a 50 mL Schlenk flask under argon. NaOEt (21 % solution, 0.2 mL) was added dropwise and the purple solution turned a green colour, before reverting to purple after 5 min. The solution was left to stir at room temperature for 20 h. The reaction was quenched by adding H<sub>2</sub>O (20 mL) and the aqueous layer was extracted three times with CH<sub>2</sub>Cl<sub>2</sub>. The organic layer was dried over Na<sub>2</sub>SO<sub>4</sub>, filtered and solvents were removed *in vacuo*. The residue was filtered through a short plug of silica using CH<sub>2</sub>Cl<sub>2</sub> as eluent. Solvents were removed *in vacuo* and the title compound was obtained *via* recrystallisation from CH<sub>2</sub>Cl<sub>2</sub>/MeOH to yield purple crystals (31 mg, 0.046 mmol, 78 %); M.p. >300 °C; R<sub>f</sub> = 0.61 (CH<sub>2</sub>Cl<sub>2</sub> : *n*-hexane = 1:1, v/v); <sup>1</sup>H NMR (400 MHz, CDCl<sub>3</sub>, 25 °C): δ = 2.73 (s, 6H, tolyl-CH<sub>3</sub>), 3.04 (s, 3H, SCH<sub>3</sub>), 7.57 (d, *J* = 7.8 Hz, 4H, tolyl-*o*-CH), 7.72-7.79 (m, 3H, phenyl-*o/p*-CH), 8.09 (d, *J* = 7.8 Hz, 4H, tolyl-*m*-CH), 8.18-8.20

(m, 2H, phenyl-*m*-CH), 8.92 (dd, *J* = 11.0, 4.6 Hz, 2H, *H*<sub>β</sub>), 9.04 (d, *J* = 4.6 Hz, 2H, *H*<sub>β</sub>), 10.06 ppm (d, *J* = 4.6 Hz, 2H, *H*<sub>β</sub>); <sup>13</sup>C NMR (100 MHz, CDCl<sub>3</sub>, 25 °C): δ = 21.5, 26.8, 113.7, 121.5, 122.4, 126.5, 127.3, 127.5, 131.9, 132.0, 132.1, 133.1, 134.3, 134.4, 137.2, 139.6, 142.7, 149.8, 150.6, 150.8, 154.2 ppm; UV/Vis



(CH<sub>2</sub>Cl<sub>2</sub>):  $\lambda_{\max}$  (log  $\epsilon$ ) = 422 (5.69), 552 (4.32), 593 nm (3.64); HRMS (MALDI)  $m/z$  calcd. for C<sub>41</sub>H<sub>30</sub>N<sub>4</sub>SZn [M]<sup>+</sup>: 674.1483, found 674.1492.

**{5-Butyl-10,20-bis(1-ethylpropyl)-15-methylthioporphyrinato}nickel(II) 4f:** Thiol surrogate **2i** (100 mg,

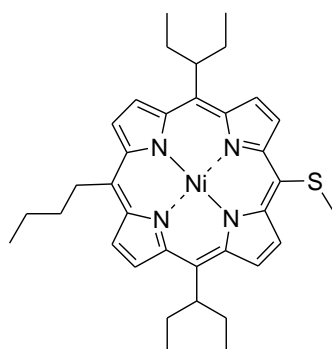

0.128 mmol) was dissolved in anhydrous toluene (20 mL) together with methyl iodide (0.08 mL, 1.304 mmol). NaOEt (21 % solution, 0.2 mL) was added dropwise and the solution left to stir at room temperature for one hour. Reaction was quenched by adding H<sub>2</sub>O (20 mL) and the aqueous layer was extracted three times with CH<sub>2</sub>Cl<sub>2</sub>. Title compound was obtained *via* recrystallisation (CH<sub>2</sub>Cl<sub>2</sub>/MeOH) to yield purple crystals (77 mg, 0.121 mmol, >95%); M.p. 215-216 °C; R<sub>f</sub> = 0.63 (CH<sub>2</sub>Cl<sub>2</sub> : *n*-hexane = 1:4, v/v); <sup>1</sup>H NMR (400 MHz, CDCl<sub>3</sub>, 25 °C):  $\delta$  = 0.89 (t,  $J$  = 7.4 Hz, 12H, ethylpropyl-CH<sub>3</sub>), 1.00 (t,  $J$  = 7.4 Hz, 3H, butyl-CH<sub>3</sub>), 1.50-1.56 (m, 2H, butyl-CH<sub>2</sub>CH<sub>2</sub>CH<sub>3</sub>), 2.15-2.23 (m, 2H, butyl-CH<sub>2</sub>CH<sub>2</sub>CH<sub>2</sub>), 2.55-2.69 (m, 8H, ethylpropyl-CH<sub>2</sub>), 2.61 (s, 3H, SCH<sub>3</sub>), 4.22-4.29 (m, 2H, ethylpropyl-CH), 4.44 (t,  $J$

= 8.0 Hz, 2H, butyl-CH<sub>2</sub>CH<sub>2</sub>CH<sub>2</sub>), 9.19 (d,  $J$  = 5.1 Hz, 2H,  $H_{\beta}$ ), 9.29-9.31 (m, 4H,  $H_{\beta}$ ), 9.63 ppm (d,  $J$  = 5.1 Hz, 2H,  $H_{\beta}$ ); <sup>13</sup>C NMR (100 MHz, CDCl<sub>3</sub>, 25 °C):  $\delta$  = 13.9, 23.3, 24.5, 33.4, 33.6, 39.2, 49.3, 109.8, 118.8, 120.9, 129.9, 130.7, 131.7, 132.1, 139.9, 141.7, 143.9 ppm; UV/Vis (CH<sub>2</sub>Cl<sub>2</sub>):  $\lambda_{\max}$  (log  $\epsilon$ ) = 423 (5.29), 546 (4.14), 585 nm (3.60); HRMS (MALDI)  $m/z$  calcd. for C<sub>35</sub>H<sub>42</sub>N<sub>4</sub>NiS [M]<sup>+</sup>: 608.2484, found 608.2509.

**{5-Hexylthio-10,20-bis(4-methylphenyl)-15-phenylporphyrinato}nickel(II) 4g:** Thiol surrogate **2g** (50 mg,

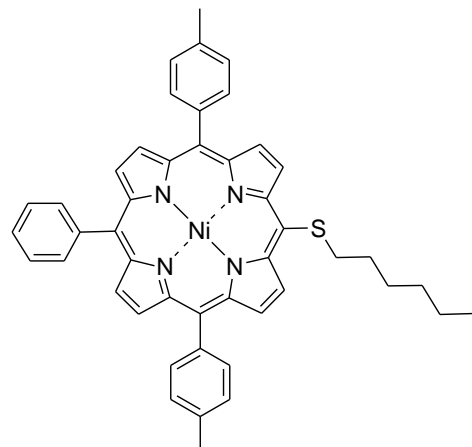

0.060 mmol) was dissolved in anhydrous toluene (20 mL) together with 1-bromohexane (0.1 mL, 0.603 mmol). NaOEt (21 % solution, 0.2 mL) was added dropwise and the solution left to stir at room temperature for one hour. Reaction was quenched by adding H<sub>2</sub>O (20 mL) and the aqueous layer was extracted three times with CH<sub>2</sub>Cl<sub>2</sub>. Title compound was obtained *via* recrystallisation (CH<sub>2</sub>Cl<sub>2</sub>/MeOH) to yield purple crystals (43 mg, 0.058 mmol, >95%); M.p. 241-243 °C; R<sub>f</sub> = 0.54 (CH<sub>2</sub>Cl<sub>2</sub> : *n*-hexane = 1:4, v/v); <sup>1</sup>H NMR (400 MHz, CDCl<sub>3</sub>, 25 °C):  $\delta$  = 0.72 (t,  $J$  = 7.2 Hz, 3H, hexyl-CH<sub>3</sub>), 1.02-1.04 (m, 2H, CH<sub>2</sub>CH<sub>2</sub>CH<sub>3</sub>), 1.08-1.12 (m, 2H, CH<sub>2</sub>CH<sub>2</sub>CH<sub>3</sub>), 1.26-1.32 (m, 4H, hexyl-CH<sub>2</sub>), 2.64 (s, 6H, tolyl-CH<sub>3</sub>), 3.07 (t,  $J$  = 7.0 Hz, 2H, SCH<sub>2</sub>CH<sub>2</sub>), 7.48 (d,  $J$  = 7.4 Hz, 4H, tolyl-*o*-CH), 7.64-7.67 (m, 3H, phenyl-*o/p*-CH), 7.87 (d,  $J$  = 7.7 Hz, 4H, tolyl-*m*-CH), 7.96-7.98 (m, 2H, phenyl-*m*-CH), 8.67-8.71 (m, 4H,

$H_{\beta}$ ), 8.82 (d,  $J$  = 5.0 Hz, 2H,  $H_{\beta}$ ), 9.80 ppm (d,  $J$  = 5.0 Hz, 2H,  $H_{\beta}$ ); <sup>13</sup>C NMR (100 MHz, CDCl<sub>3</sub>, 25 °C):  $\delta$  = 13.9, 21.5, 22.4, 28.2, 29.8, 31.2, 41.5, 119.1, 126.9, 127.3, 127.6, 127.7, 127.9, 131.6, 132.1, 132.3, 132.6, 133.0, 133.2, 133.6, 137.5, 137.6, 140.7, 142.2, 142.8, 142.9 and 146.7 ppm; UV/Vis (CH<sub>2</sub>Cl<sub>2</sub>):  $\lambda_{\max}$  (log  $\epsilon$ ) = 420 (5.23), 536 (4.15), 569 nm (3.77); HRMS (Maldi)  $m/z$  calcd. for C<sub>46</sub>H<sub>40</sub>N<sub>4</sub>NiS [M]<sup>+</sup>: 738.2327, found 738.2364.

**5-(4-bromothiophenyl)-10,20-bis(4-methylphenyl)-15-phenylporphyrin 5c:** 4-Bromothiophenol (80 mg,

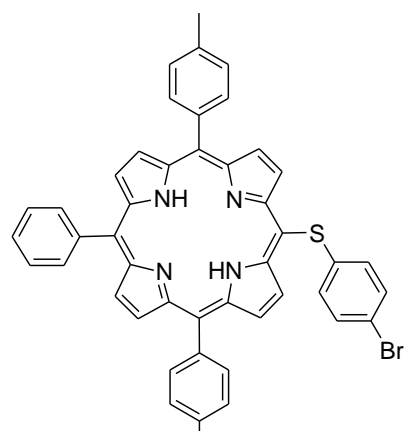

0.423 mmol) and K<sub>2</sub>CO<sub>3</sub> (200 mg, 1.450 mmol) were dissolved in anhydrous DMF (12 mL) in a 3-necked round bottomed flask. The solution was purged with argon and was heated to 100 °C for 2 h. Thiol surrogate **2d** (100 mg, 0.128 mmol) was added and the reaction was allowed to stir at 110 °C for 2h, monitoring the reaction *via* TLC analysis (CH<sub>2</sub>Cl<sub>2</sub>/*n*-hexane 1:1, v/v). Upon completion, the reaction was allowed to cool to room temperature and was washed with H<sub>2</sub>O (30 mL x 3) and extraction with CH<sub>2</sub>Cl<sub>2</sub>. Solvents were removed *in vacuo* and the residue was purified *via* column chromatography (CH<sub>2</sub>Cl<sub>2</sub>/*n*-hexane 1:2, v/v) to yield 2 main fractions, the first was **5c** with fraction two containing dimer **3d** (<40 %). Solvents were removed and the title compound was obtained *via* recrystallisation (CH<sub>2</sub>Cl<sub>2</sub>/MeOH) to yield purple

crystals (45 mg, 0.060 mmol, 47 %); M.p. >300 °C;  $R_f$  = 0.57 ( $\text{CH}_2\text{Cl}_2$  : *n*-hexane = 1:1, v/v);  $^1\text{H}$  NMR (400 MHz,  $\text{CDCl}_3$ , 25 °C):  $\delta$  = -2.61 (s, 2H, *NH*), 2.70 (s, 6H, tolyl- $\text{CH}_3$ ), 6.84 (d,  $J$  = 8.6 Hz, 2H,  $\text{C}_6\text{H}_4\text{Br-}o\text{-H}$ ), 7.10 (d,  $J$  = 8.6 Hz, 2H,  $\text{C}_6\text{H}_4\text{Br-}m\text{-H}$ ), 7.55 (d,  $J$  = 7.6 Hz, 4H, tolyl-*o*-CH), 7.74-7.79 (m, 3H, phenyl-CH), 8.06 (d,  $J$  = 7.6 Hz, 4H, tolyl-*m*-CH), 8.18 (d,  $J$  = 7.5 Hz, 2H, phenyl-CH), 8.80-8.82 (m, 4H,  $H_\beta$ ), 8.90 (d,  $J$  = 4.7 Hz, 2H,  $H_\beta$ ), 9.79 ppm (d,  $J$  = 4.7 Hz, 2H,  $H_\beta$ );  $^{13}\text{C}$  NMR (100 MHz,  $\text{CDCl}_3$ , 25 °C):  $\delta$  = 21.5, 105.1, 118.4, 121.9, 122.5, 126.7, 127.5, 127.9, 131.7, 134.4, 134.5, 137.6, 138.7, 141.8, 142.7 ppm; UV/Vis ( $\text{CH}_2\text{Cl}_2$ ):  $\lambda_{\text{max}}$  (log  $\epsilon$ ) = 423 (5.57), 521 (4.29), 557 (4.00), 594 (3.81), 649 nm (3.65); HRMS (MALDI)  $m/z$  calcd. for  $\text{C}_{46}\text{H}_{33}\text{N}_4\text{SBr}$   $[\text{M}]^+$ : 752.1609, found 752.1591.

#### 4. Note on displacement reactions:

##### General procedure for displacement of alkyl/aromatic halide with porphyrin thiolate:

Thiol surrogate (1 eq.) was dissolved in anhydrous toluene (20 mL) together with alkyl/aryl halide **6-13** (5-10 eq.). NaOEt (21 % solution, 0.2 mL) was added dropwise and the solution left to stir at room temperature for one hour. Reaction was quenched by adding H<sub>2</sub>O (20 mL) and the aqueous layer was extracted three times with CH<sub>2</sub>Cl<sub>2</sub>. The title compound and/or S-linked dimer was obtained *via* recrystallisation (CH<sub>2</sub>Cl<sub>2</sub>/MeOH) to yield purple crystals.

##### General procedure for displacement porphyrin thioether chain by N- or S-nucleophile:

Nucleophile **14, 15** or **16** (3 eq.) and K<sub>2</sub>CO<sub>3</sub> (10-11 eq.) were dissolved in anhydrous DMF (12 mL) in a 3-necked round bottomed flask. The solution was purged with argon and was heated to 100 °C for 2 h. Thiol surrogate (1 eq.) was added and the reaction was allowed to stir at 110 °C for 2h, monitoring the reaction *via* TLC analysis (CH<sub>2</sub>Cl<sub>2</sub>/*n*-hexane 1:1, v/v). Upon completion, the reaction was allowed to cool to room temperature and was washed with H<sub>2</sub>O (30 mL x 3) and was extracted with CH<sub>2</sub>Cl<sub>2</sub>. Solvents were removed *in vacuo* and the residue was purified *via* column chromatography (CH<sub>2</sub>Cl<sub>2</sub>/*n*-hexane 1:2, v/v).

##### General procedure for displacement porphyrin thioether chain by organolithium reagent:

Thiol surrogate (1 eq.) was added to a Schlenk flask under argon and dissolved in anhydrous THF (20-30 mL). The solution was cooled to -78 °C before dropwise addition of organolithium reagent **17** or **18** (6 eq.). Following addition, the reaction was allowed to stir at -78 °C for 10 min before warming to room temperature (over approx. 2h). H<sub>2</sub>O (2 mL) was added and the solution stirred for 20 min. DDQ (6 eq.) was added and the reaction was allowed stir open to air for 1 h. The solution was then filtered through a plug of silica using CH<sub>2</sub>Cl<sub>2</sub> as eluent. Solvents were removed *in vacuo* and the residue was purified *via* column chromatography (CH<sub>2</sub>Cl<sub>2</sub>/*n*-hexane 1:2, v/v).

**Table 1:** Displacement reactions: a) porphyrin thiol surrogate with alkyl/aromatic halides and b) displacement of thioether chain by nucleophilic base

**R<sup>3</sup>-X**  
**Alkyl** R<sup>3</sup> = Me, X = I **6**  
R<sup>3</sup>-X R<sup>3</sup> = *n*-Hexyl, X = Br **7**  
R<sup>3</sup>-X R<sup>3</sup> = *n*-Hexyl, X = I **8**

**Aromatic**  

X

Y

Y = H, X = Br **9**  
Y = H, X = I **10**  
Y = Me, X = Br **11**  
Y = NO<sub>2</sub>, X = Br **12**  
Y = CHO, X = F **13**

**R<sup>3</sup>-X**  
**2a, 2d,**  
**2g, 2i**

**Nucleophilic base**

**Nu base : 14**

**15**

**16**

***n*-BuLi 17**

**PhLi 18**

| Entry | R <sup>3</sup> -X | R <sup>1</sup> | R <sup>2</sup>  | M                | Product <sup>b</sup> | Yield <sup>a</sup> | Entry | Nucleophile | R <sup>1</sup> | R <sup>2</sup> | M                | Product   | Yield <sup>a</sup>  |
|-------|-------------------|----------------|-----------------|------------------|----------------------|--------------------|-------|-------------|----------------|----------------|------------------|-----------|---------------------|
| 1     | <b>6</b>          | Tolyl          | Ph              | Zn <sup>II</sup> | <b>4a</b>            | 71                 | 10    | <b>14</b>   | Tolyl          | Ph             | Zn <sup>II</sup> | <b>5a</b> | n/d <sup>d</sup>    |
| 2     | <b>7</b>          | Tolyl          | Ph              | Zn <sup>II</sup> | <b>4b</b>            | trace <sup>c</sup> | 11    | <b>15</b>   | Tolyl          | Ph             | Zn <sup>II</sup> | <b>5b</b> | n/d <sup>d</sup>    |
| 3     | <b>8</b>          | Tolyl          | Ph              | Zn <sup>II</sup> | <b>4c</b>            | trace <sup>c</sup> | 12    | <b>16</b>   | Tolyl          | Ph             | 2H               | <b>5c</b> | 48 <sup>d</sup>     |
| 4     | <b>9</b>          | Tolyl          | Ph              | Zn <sup>II</sup> | <b>4d</b>            | n/d <sup>c</sup>   | 13    | <b>17</b>   | Tolyl          | Ph             | 2H               | <b>5d</b> | <10% <sup>e</sup>   |
| 5     | <b>11</b>         | Tolyl          | Ph              | Zn <sup>II</sup> | <b>4e</b>            | n/d <sup>c</sup>   | 15    | <b>17</b>   | Tolyl          | Ph             | Ni <sup>II</sup> | <b>5e</b> | Trace <sup>e</sup>  |
| 6     | <b>6</b>          | 1-Ethylpropyl  | <i>n</i> -Butyl | Ni <sup>II</sup> | <b>4f</b>            | 95                 | 16    | <b>17</b>   | Tolyl          | Ph             | Ni <sup>II</sup> | <b>5e</b> | <10% <sup>e</sup>   |
| 7     | <b>7</b>          | Tolyl          | Ph              | Ni <sup>II</sup> | <b>4g</b>            | 95                 | 17    | <b>18</b>   | Tolyl          | Ph             | Ni <sup>II</sup> | <b>5f</b> | n/d <sup>d</sup>    |
| 8     | <b>10</b>         | Tolyl          | Ph              | Ni <sup>II</sup> | <b>4h</b>            | n/d <sup>c</sup>   | 18    | <b>16</b>   | Tolyl          | Ph             | Ni <sup>II</sup> | <b>5g</b> | >30% <sup>c,d</sup> |
| 9     | <b>12</b>         | Tolyl          | Ph              | Ni <sup>II</sup> | <b>4i</b>            | n/d <sup>c</sup>   |       |             |                |                |                  |           |                     |

<sup>a</sup> Isolated yield; <sup>b</sup> Reagents and conditions:  $R^3-X$  (5-10 eq.), NaOEt (21% in EtOH), toluene, rt, Ar, 3-18 h; <sup>c</sup> S-linked dimer predominant product; <sup>d</sup> Reagents and conditions: i) S-/N-nucleophile (5 eq.), K<sub>2</sub>CO<sub>3</sub> (10-11 eq.), DMF, 110 °C, 2 h ii) porphyrin (1 eq.), 110 °C, 2-16 h; <sup>e</sup> Reagents and conditions: i) porphyrin, THF, -78 °C ii) *n*-BuLi (6 eq.), -78 °C – rt, 2 h; <sup>f</sup> Predominant product was unreacted starting material;

Table 1 is an expansion of Table 3 in the main text. For alkyl and aryl halides **6-13**, numerous halide displacement attempts were made, with most success observed for alkyl derivatives **6** and **7**. For aromatic halides, no displacement was observed, with the predominant product being the S-linked dimer. This indicates that for aromatic residues the thioether chain acts as a better leaving group than halides I, Br or F. For nucleophilic displacement of the thioether chain, nucleophiles **14-18** were used. For N-nucleophiles **14** and **15**,

the predominant products observed again were S-linked dimers indicating that the nucleophilic strength of the porphyrin thiolate exceeds that of the aforementioned bases. Using organolithium reagents **17** and **18**, some success was seen with butylated products **5d** and **5e** synthesised in <10 % yield. The other products from this reaction were unreacted starting material (~40 %) and higher butylated product (<10 %). Best results were observed using S-nucleophile **16** whereby the thiolate generated from this thiophenol successfully displaced the thioether chain of porphyrin **2d**, giving **5c** in 48 % yield. This displays the potential applicability of this type of surrogate to act as a leaving group using soft nucleophiles such as **16**.

## 5. References

- <sup>1</sup>. Habermeyer, B.; Takai, A.; Gros, C. P.; El Ojaimi, M.; Barbe, J.-M.; Fukuzumi, S. *Chem.-Eur. J.* **2011**, *17*, 10670.
- <sup>2</sup>. Tomizaki, K.-y.; Lysenko, A. B.; Taniguchi, M.; Lindsey, J. S. *Tetrahedron* **2004**, *60*, 2011.
- <sup>3</sup>. Lin, V.; DiMagno, S.; Therien, M. *Science* **1994**, *264*, 1105.
- <sup>4</sup>. Takanami, T.; Hayashi, M.; Chijimatsu, H.; Inoue, W.; Suda, K. *Org. Lett.* **2005**, *7*, 3937.
- <sup>5</sup>. Lu, X.-Q.; Guo, Y.; Chen, Q.-Y. *Synlett* **2011**, 77.
- <sup>6</sup>. Plunkett, S.; Dahms, K.; Senge, M. O. *Eur. J. Org. Chem.* **2013**, 1566.
- <sup>7</sup>. Hartnell, R. D.; Edwards, A. J.; Arnold, D. P. *J. Porphyrins Phthalocyanines* **2002**, *6*, 695.

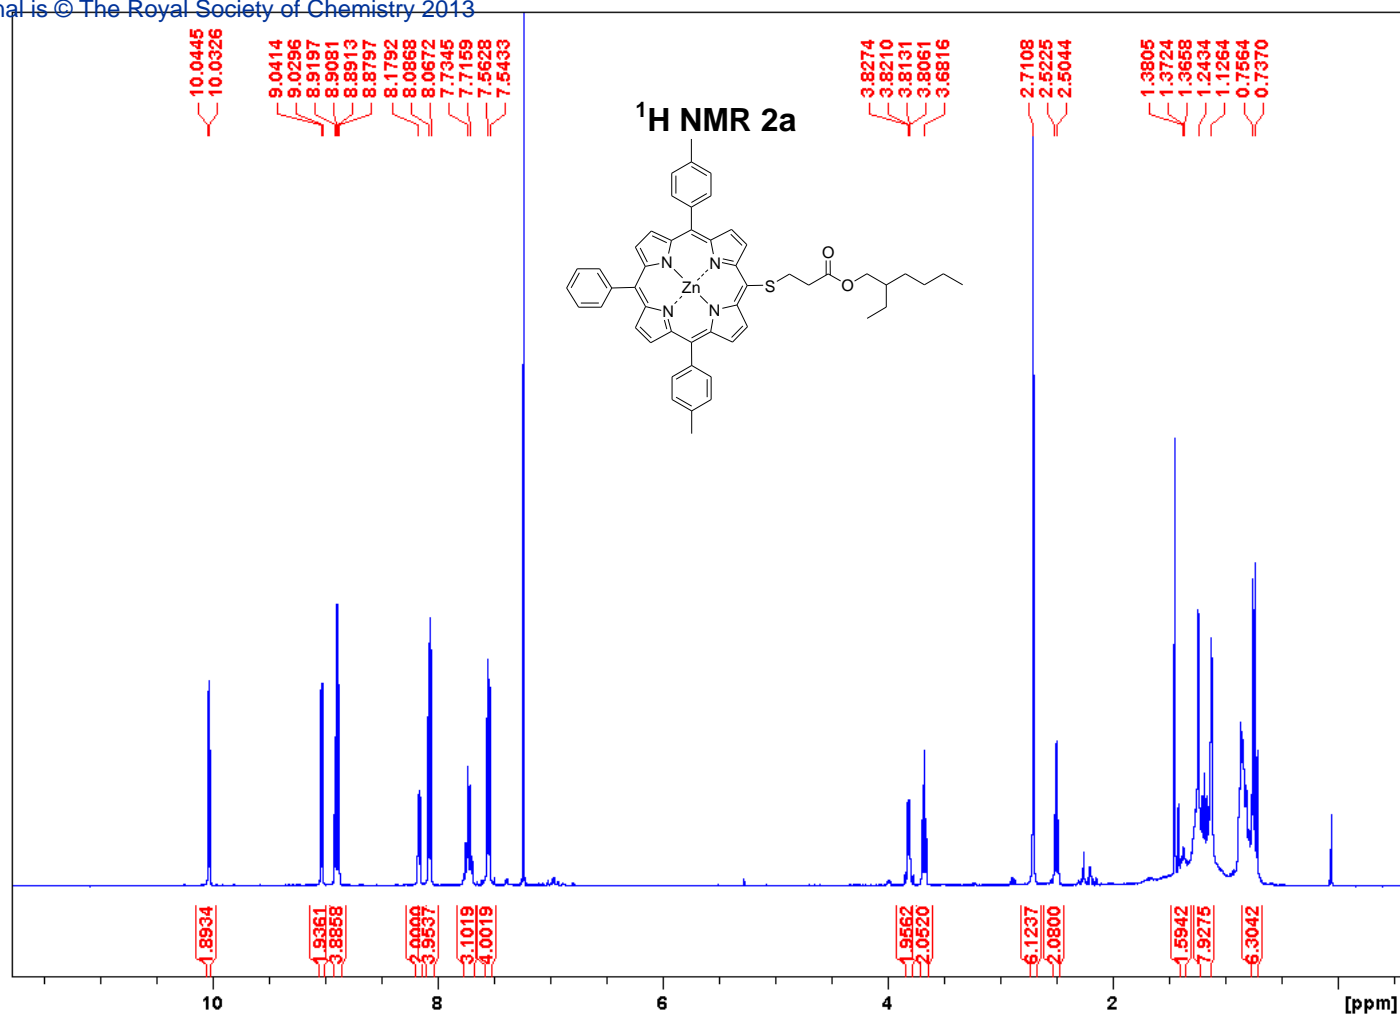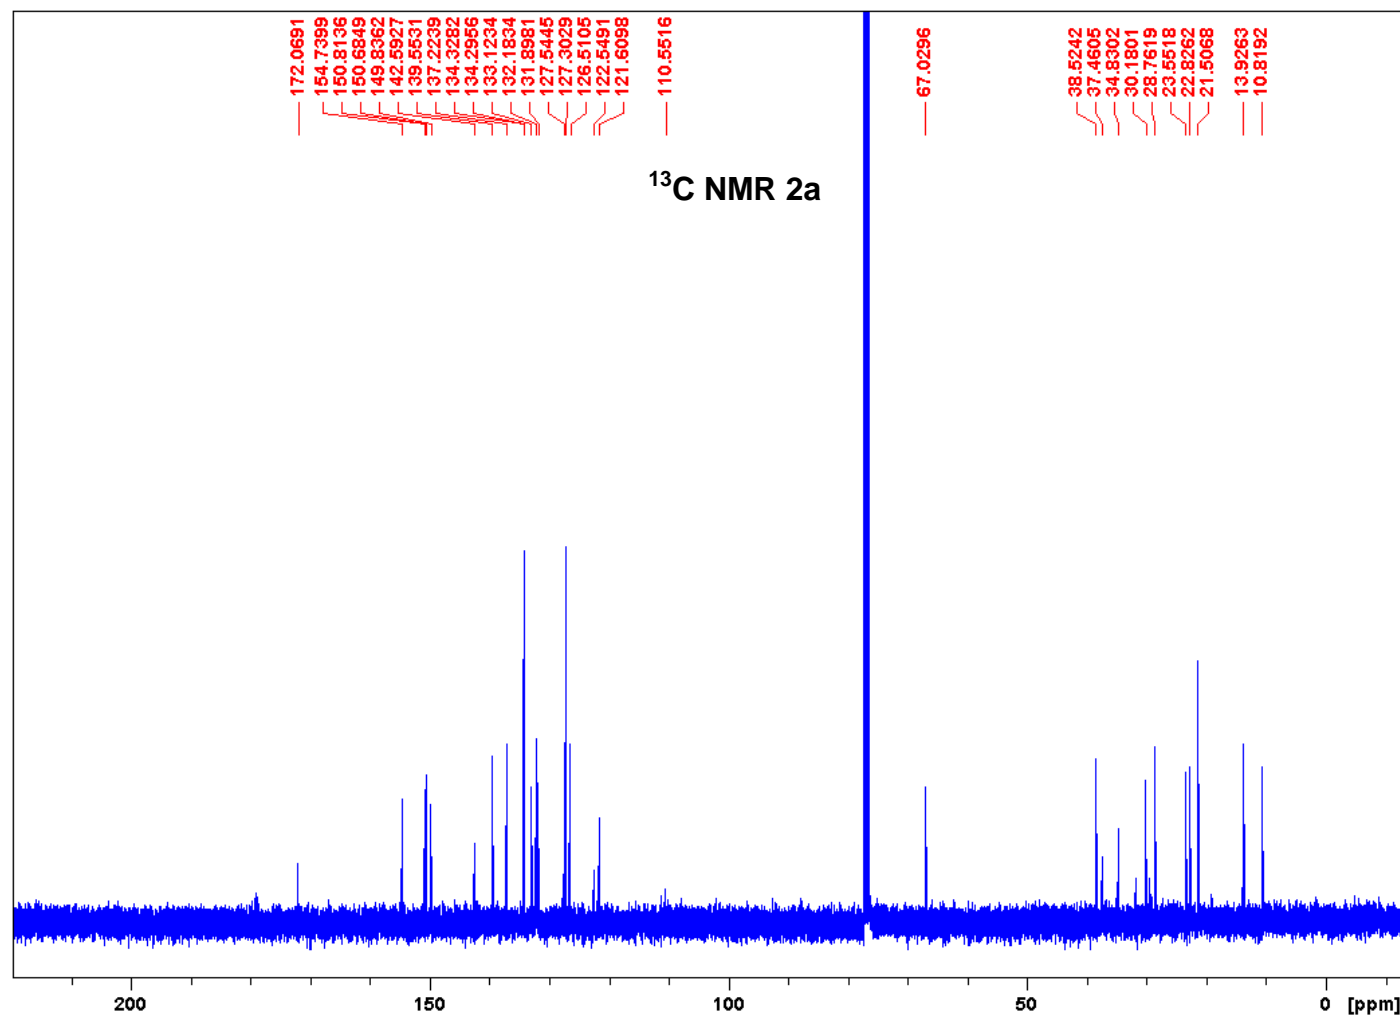



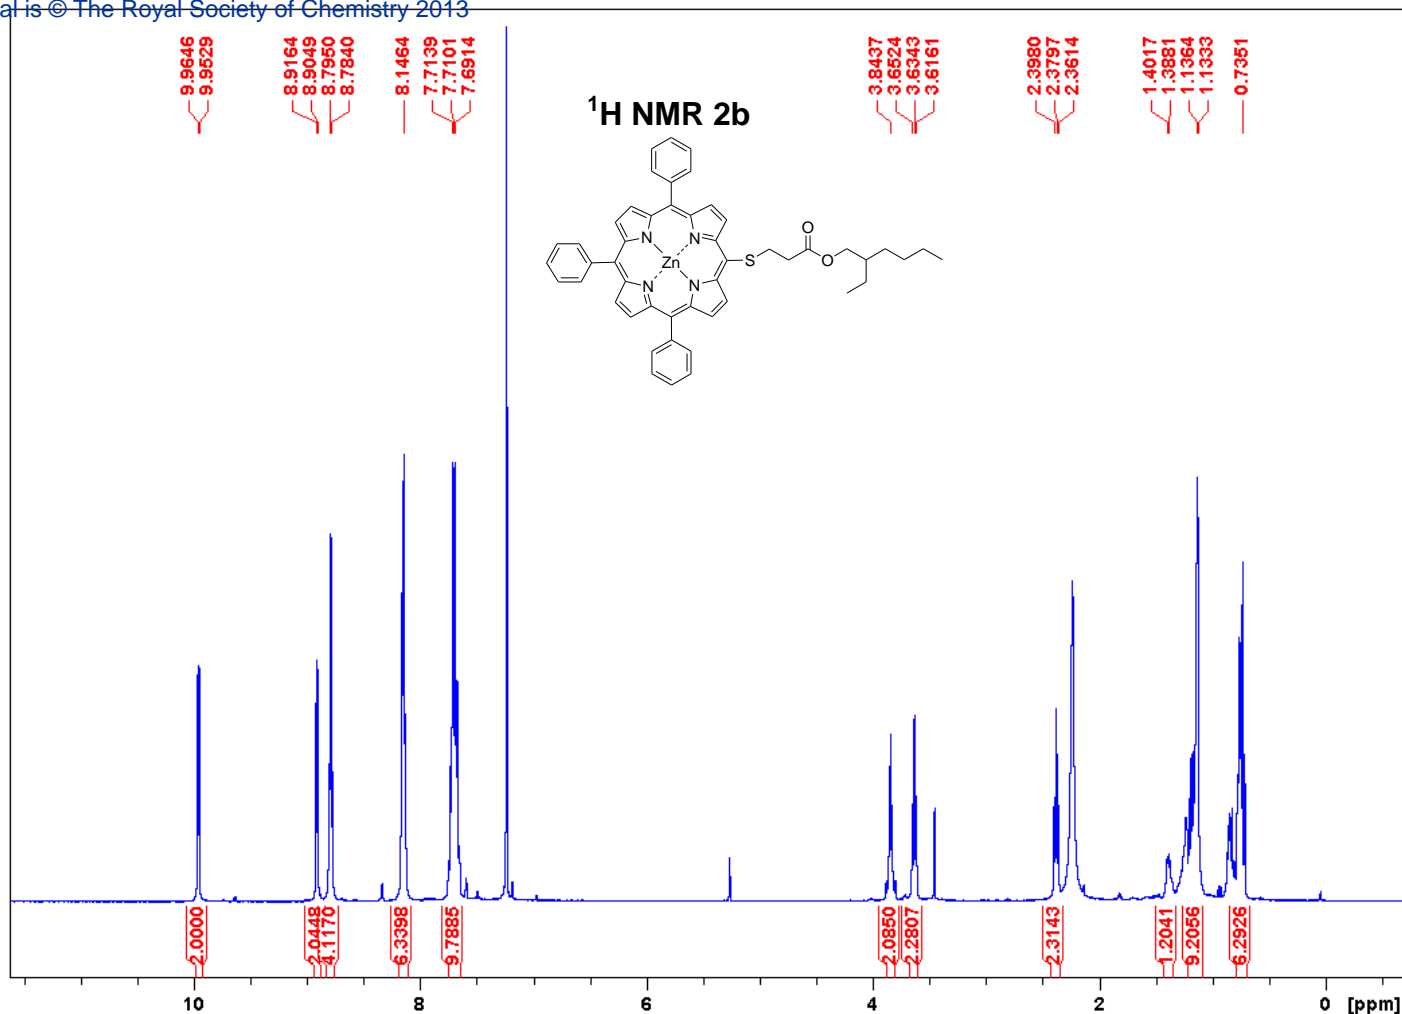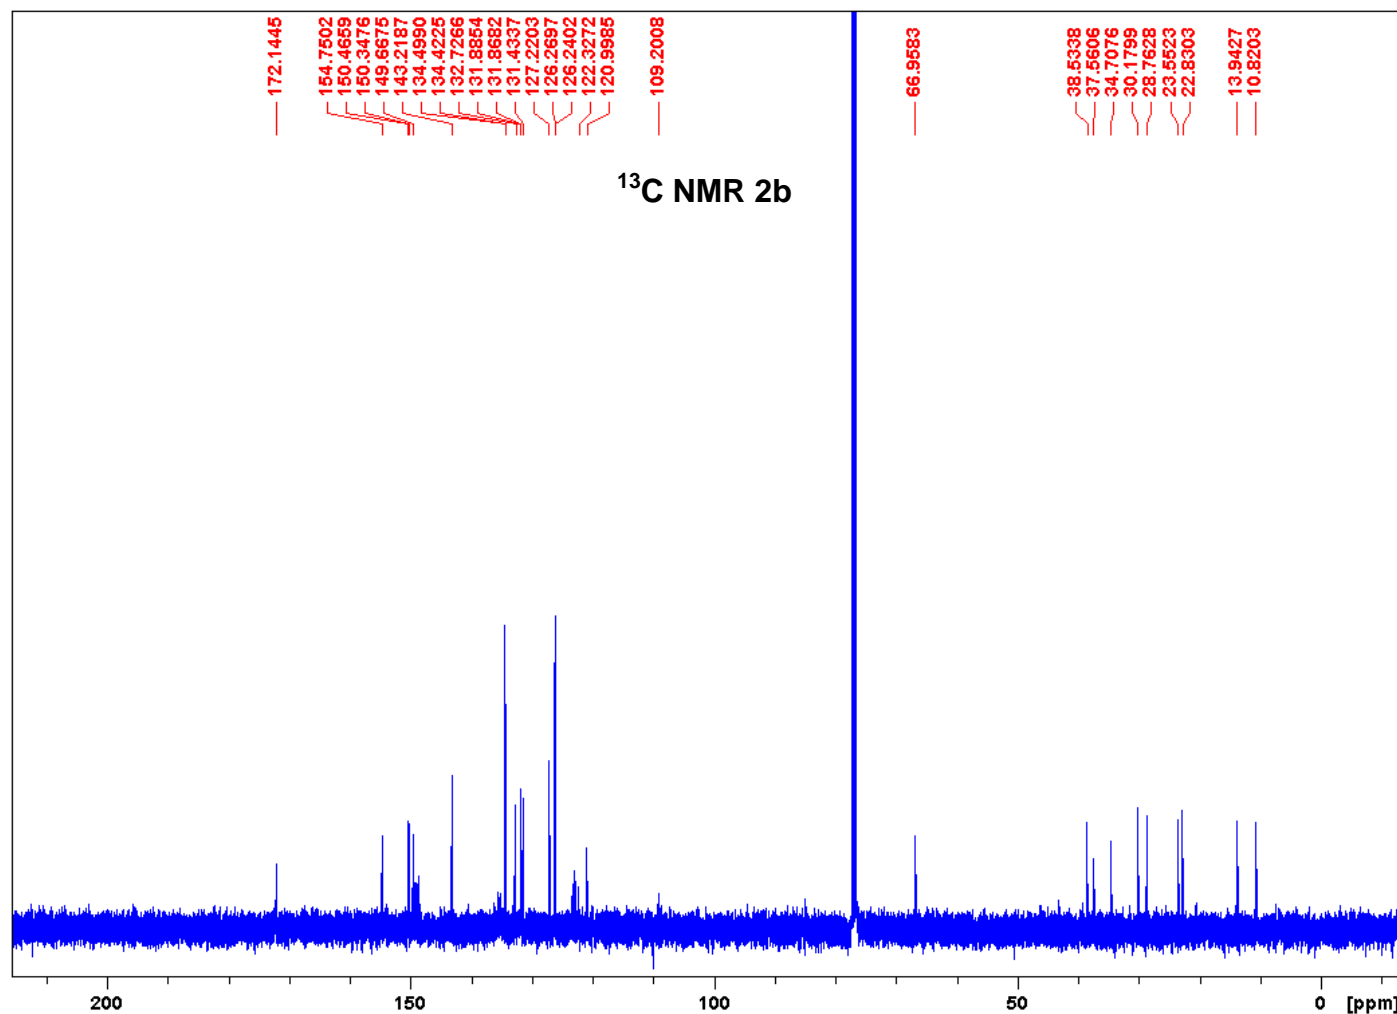

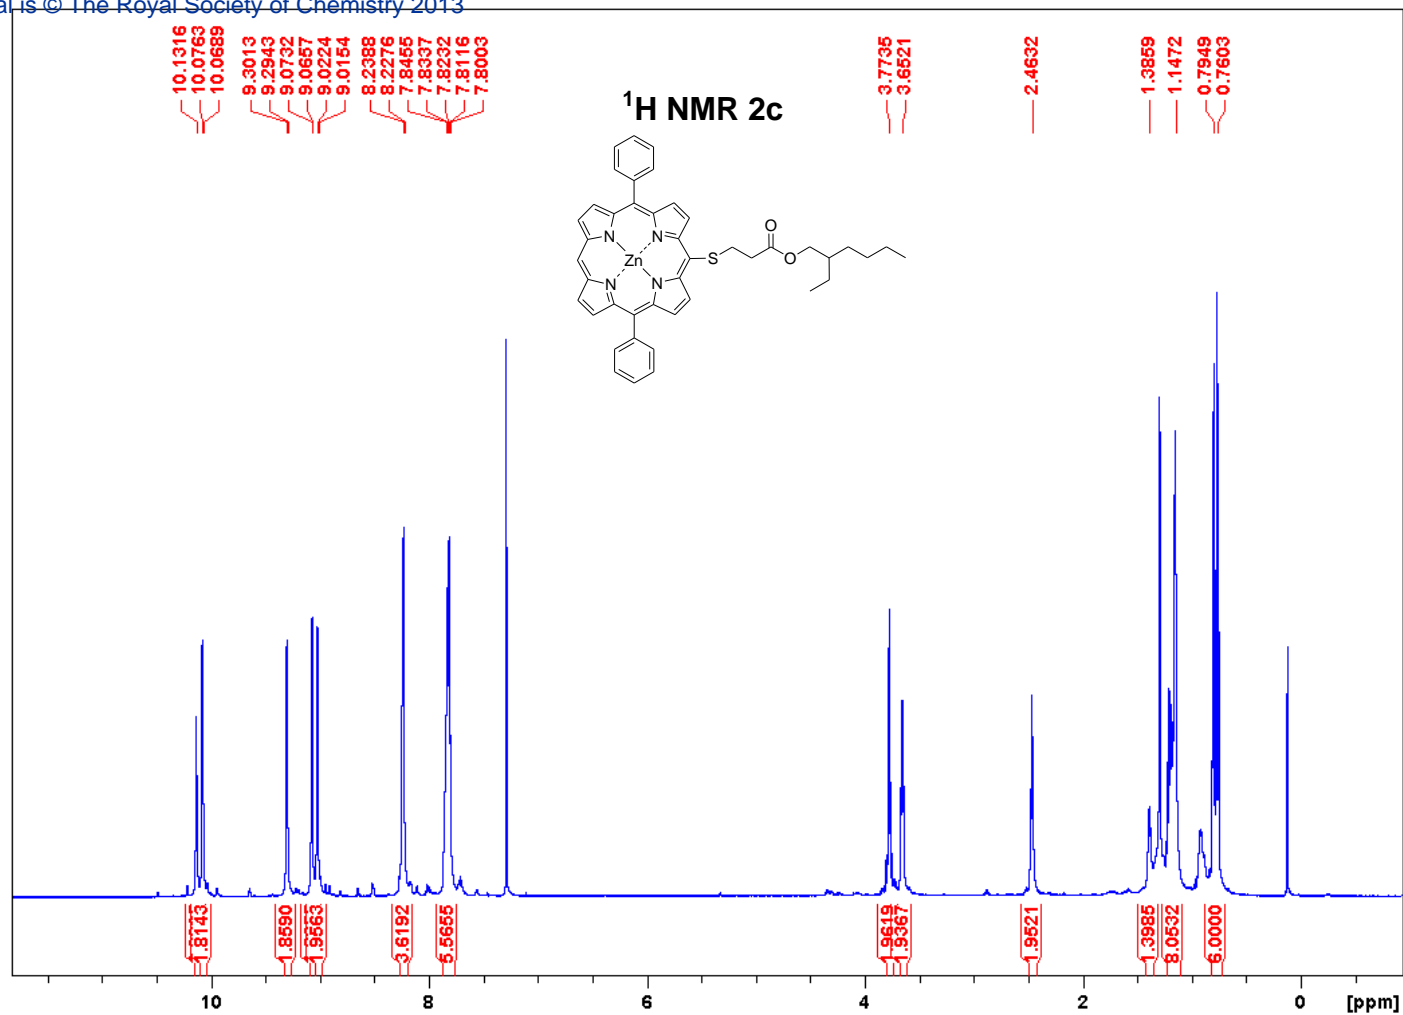

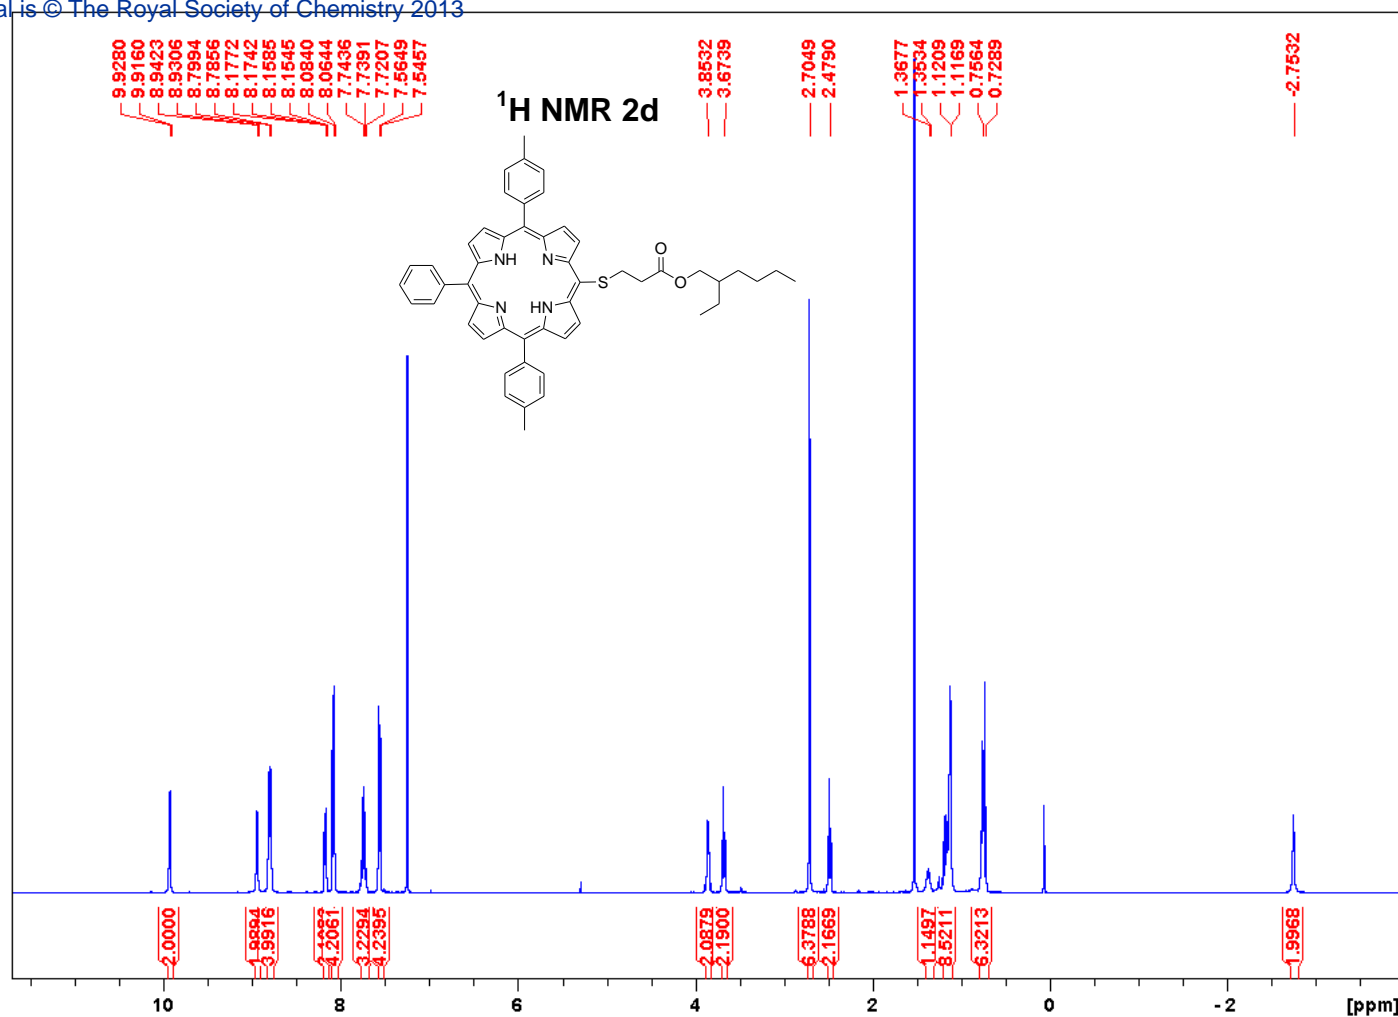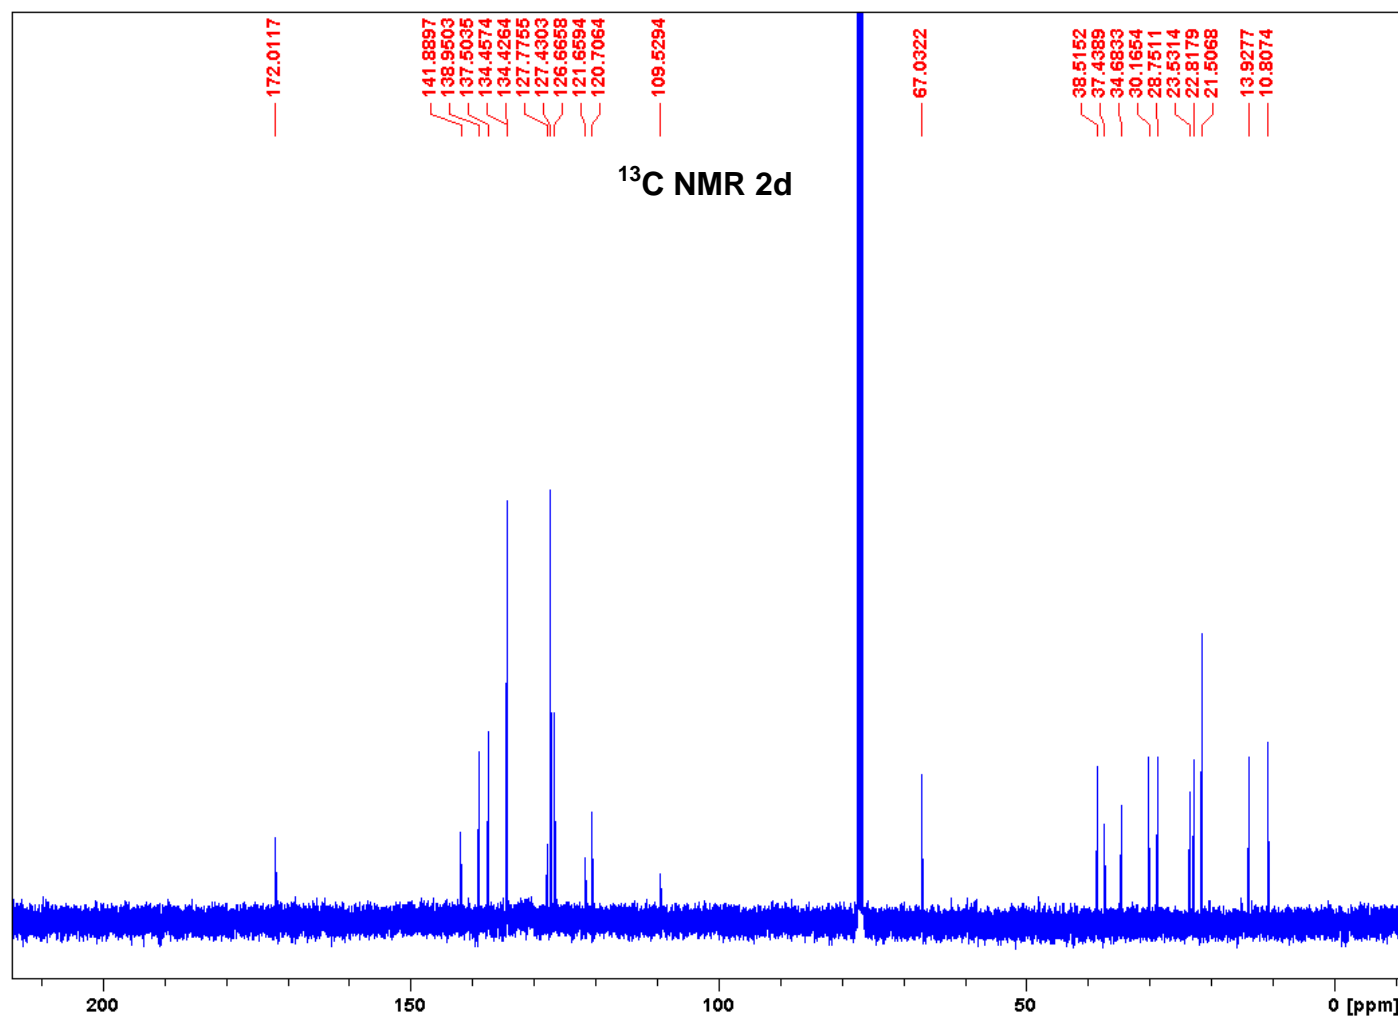

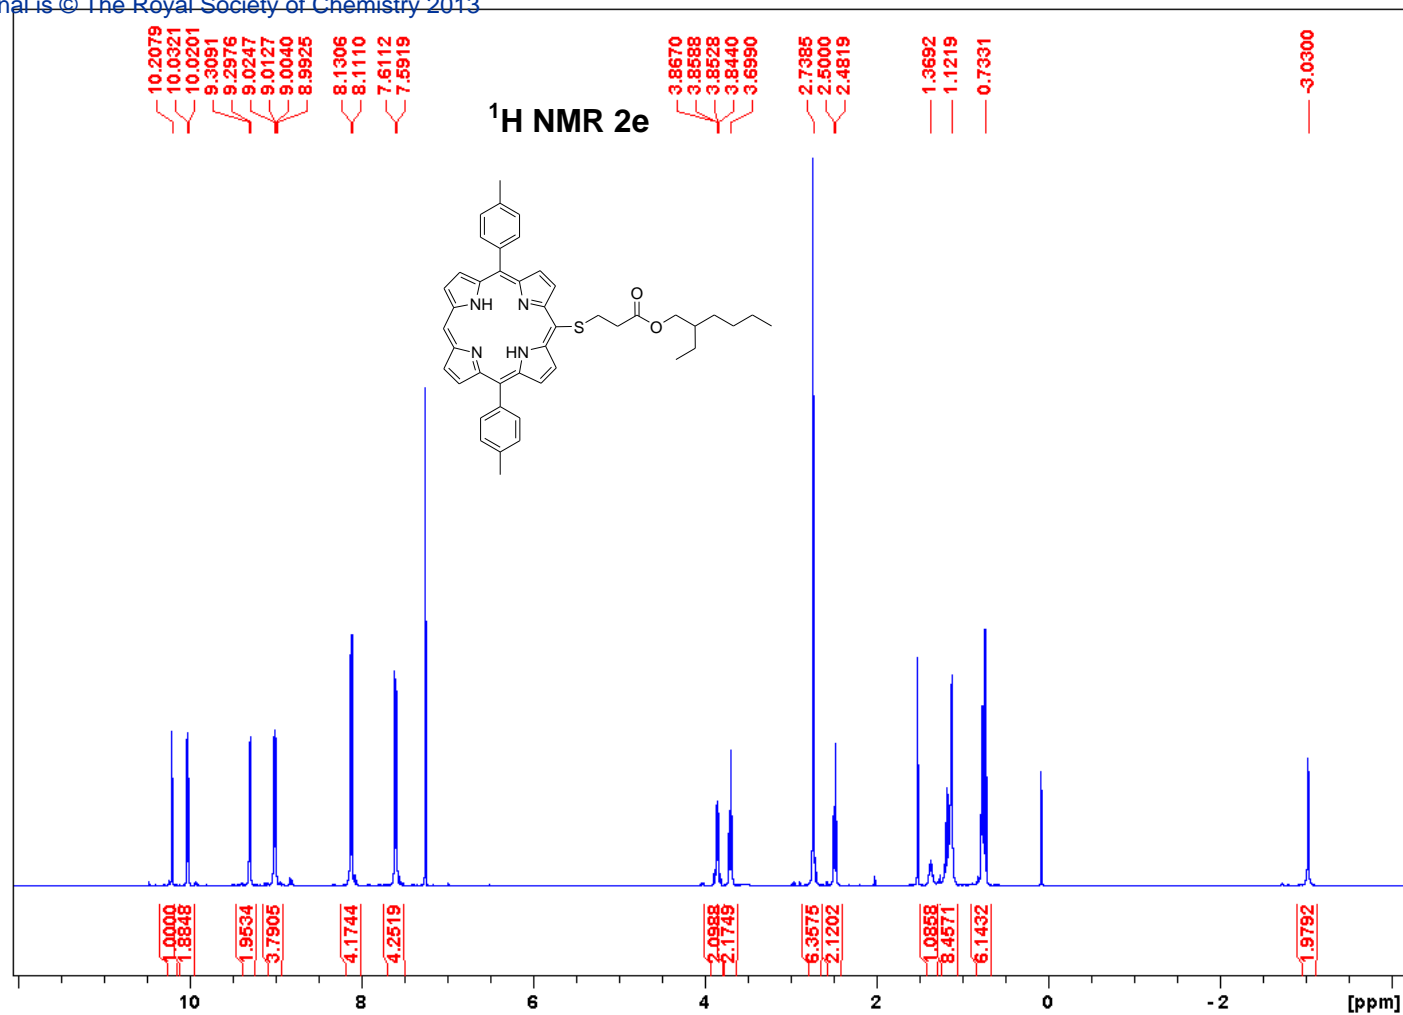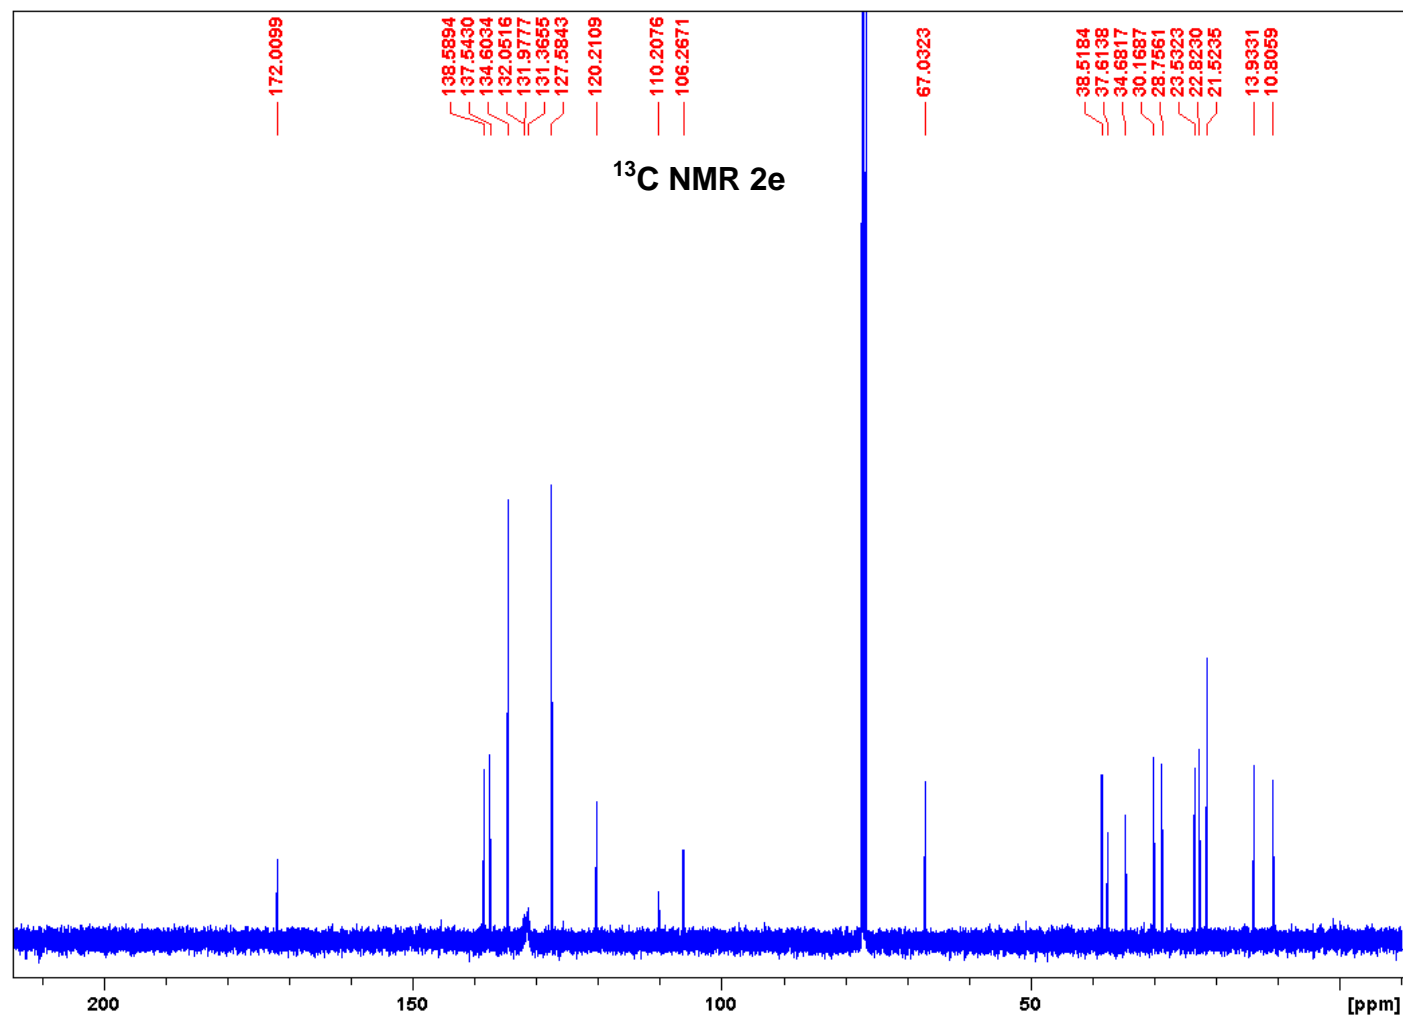

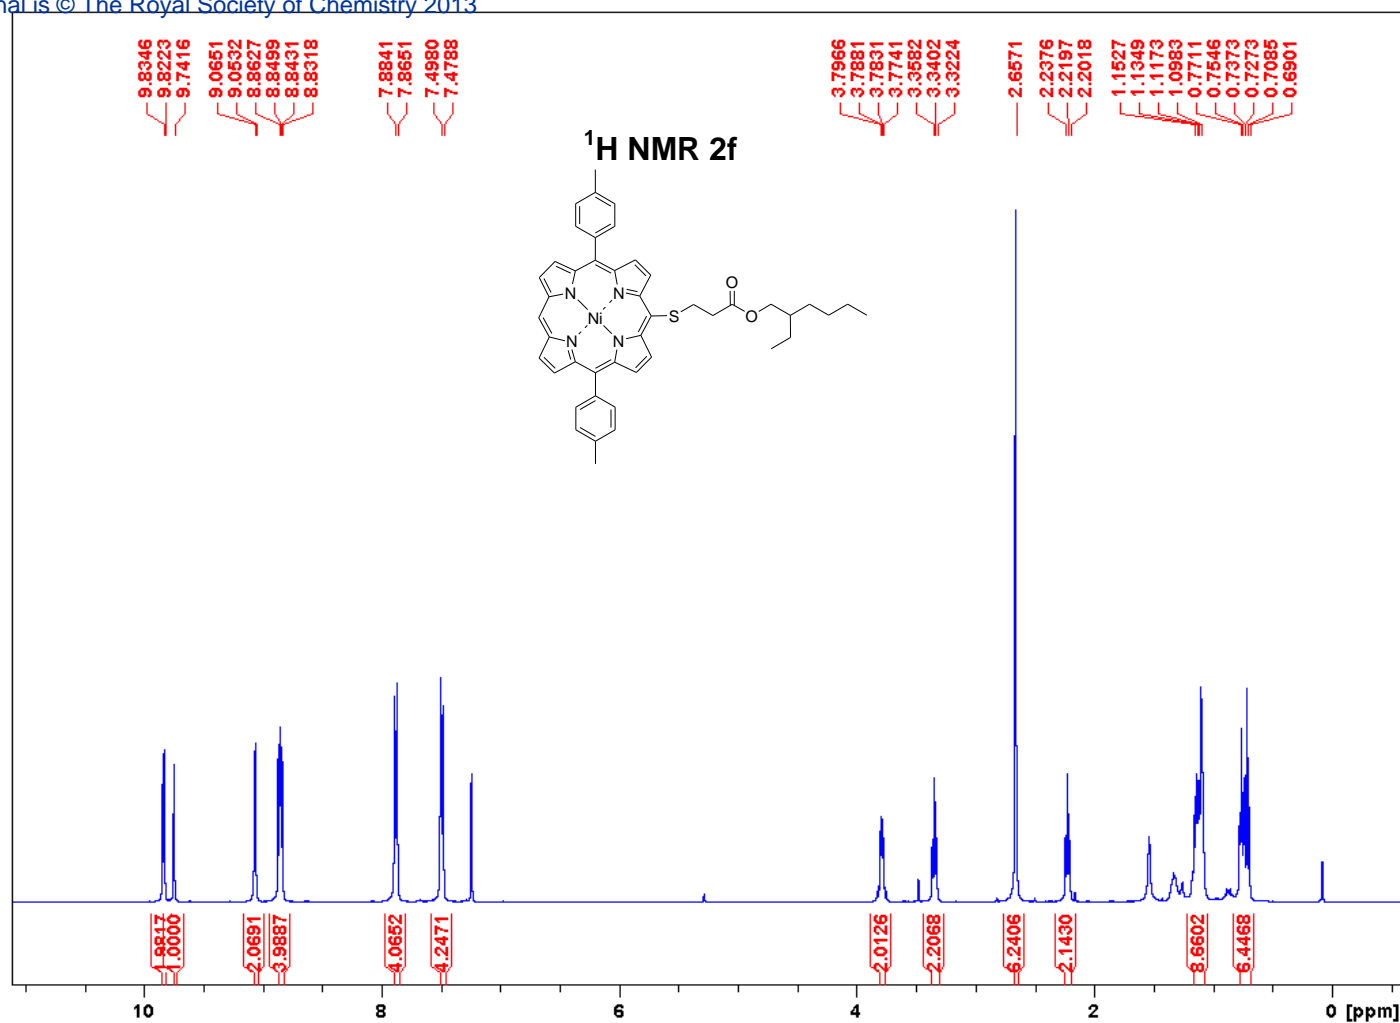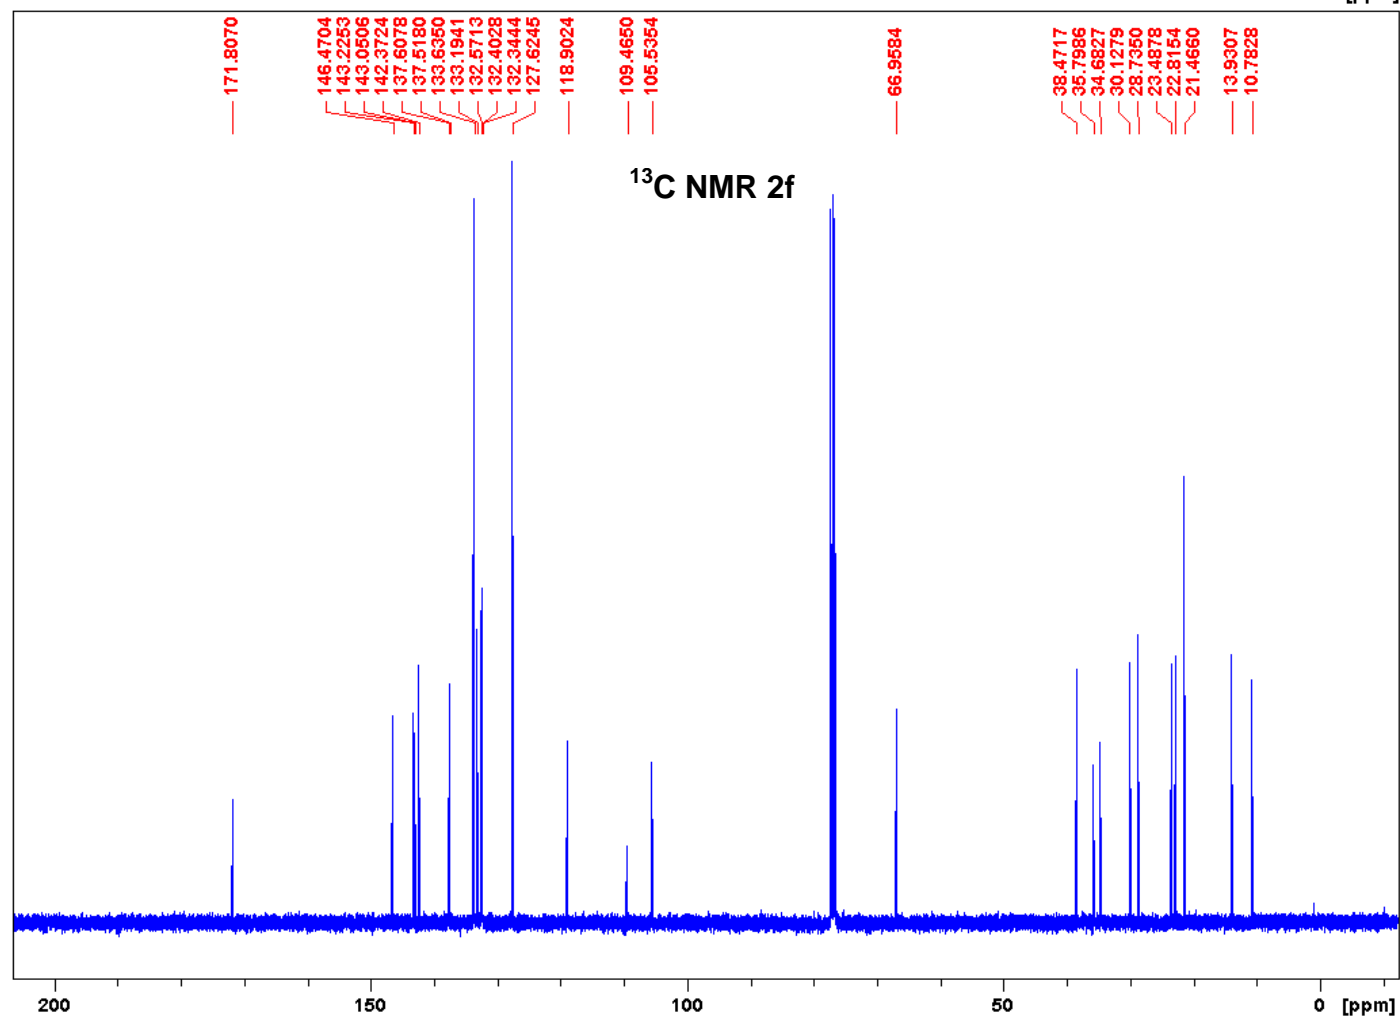



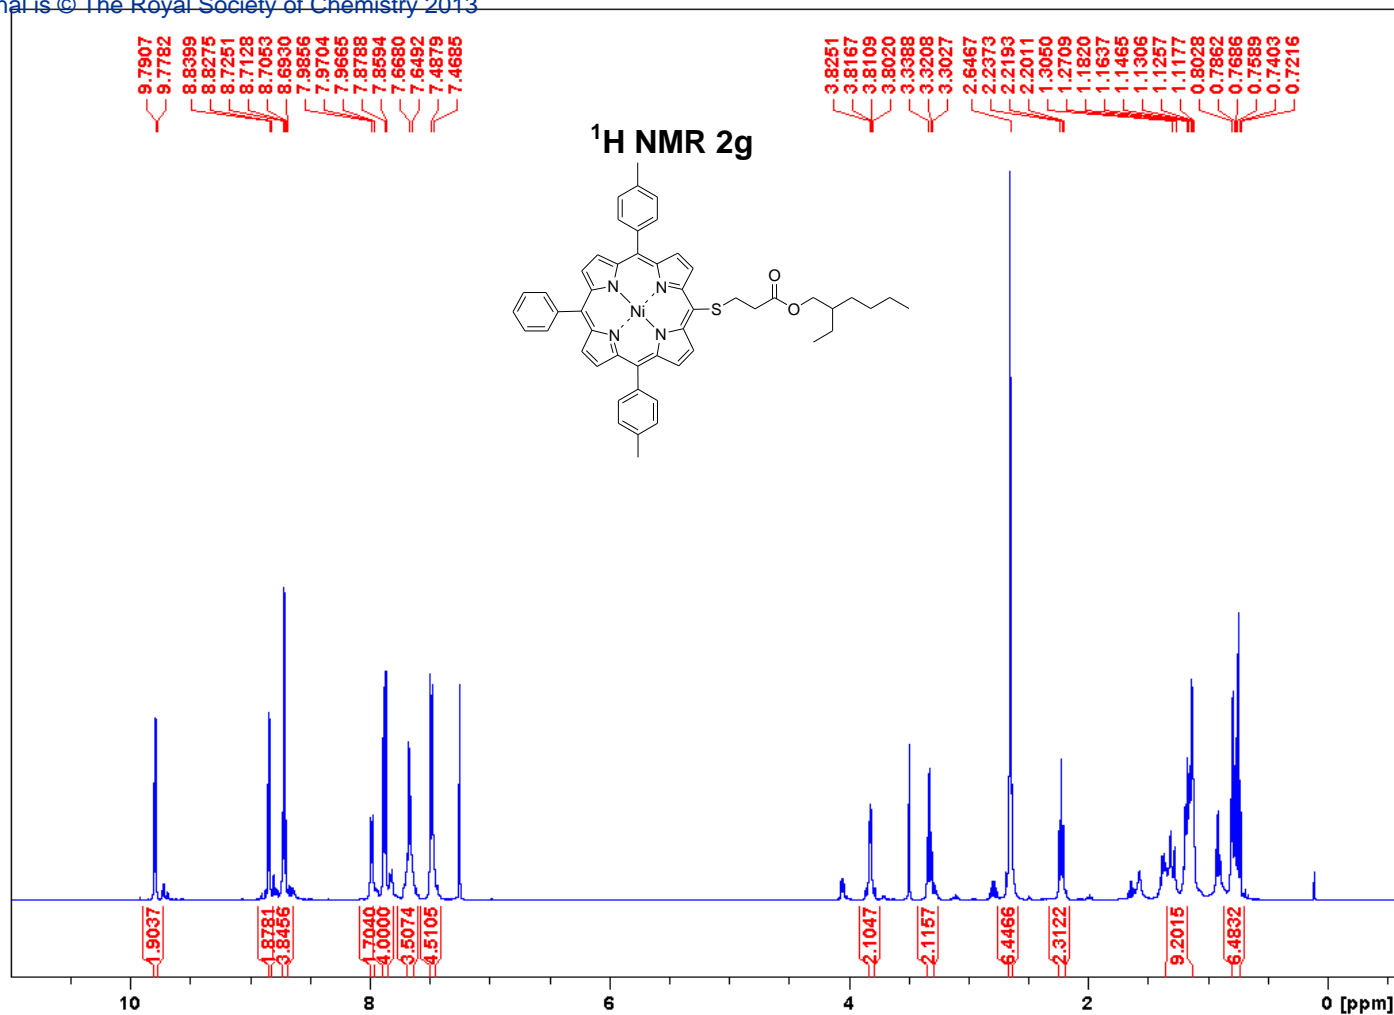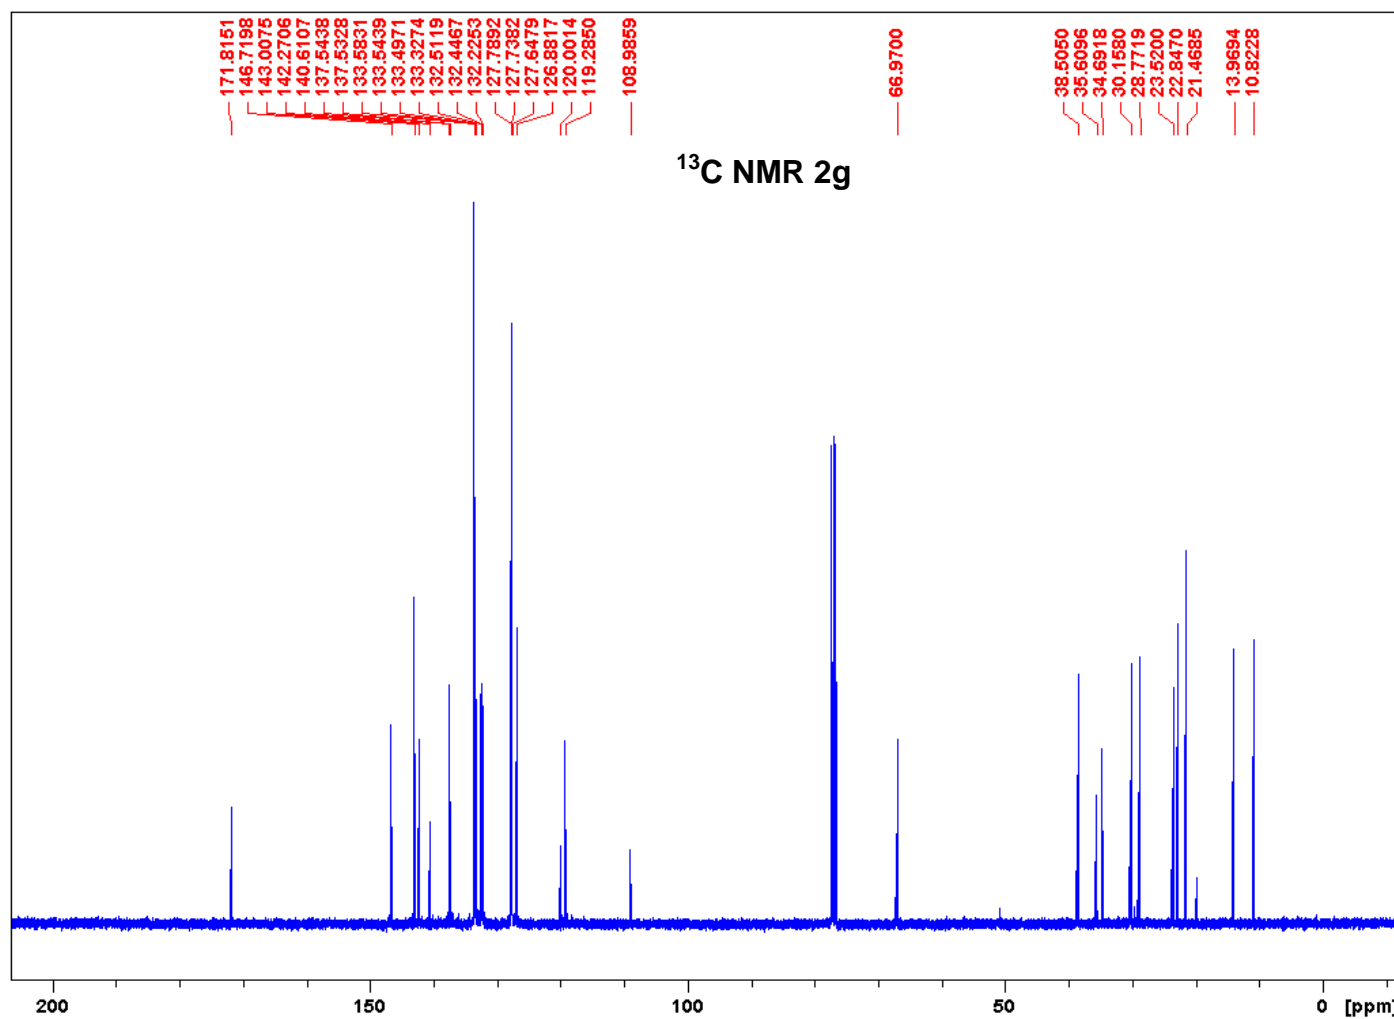

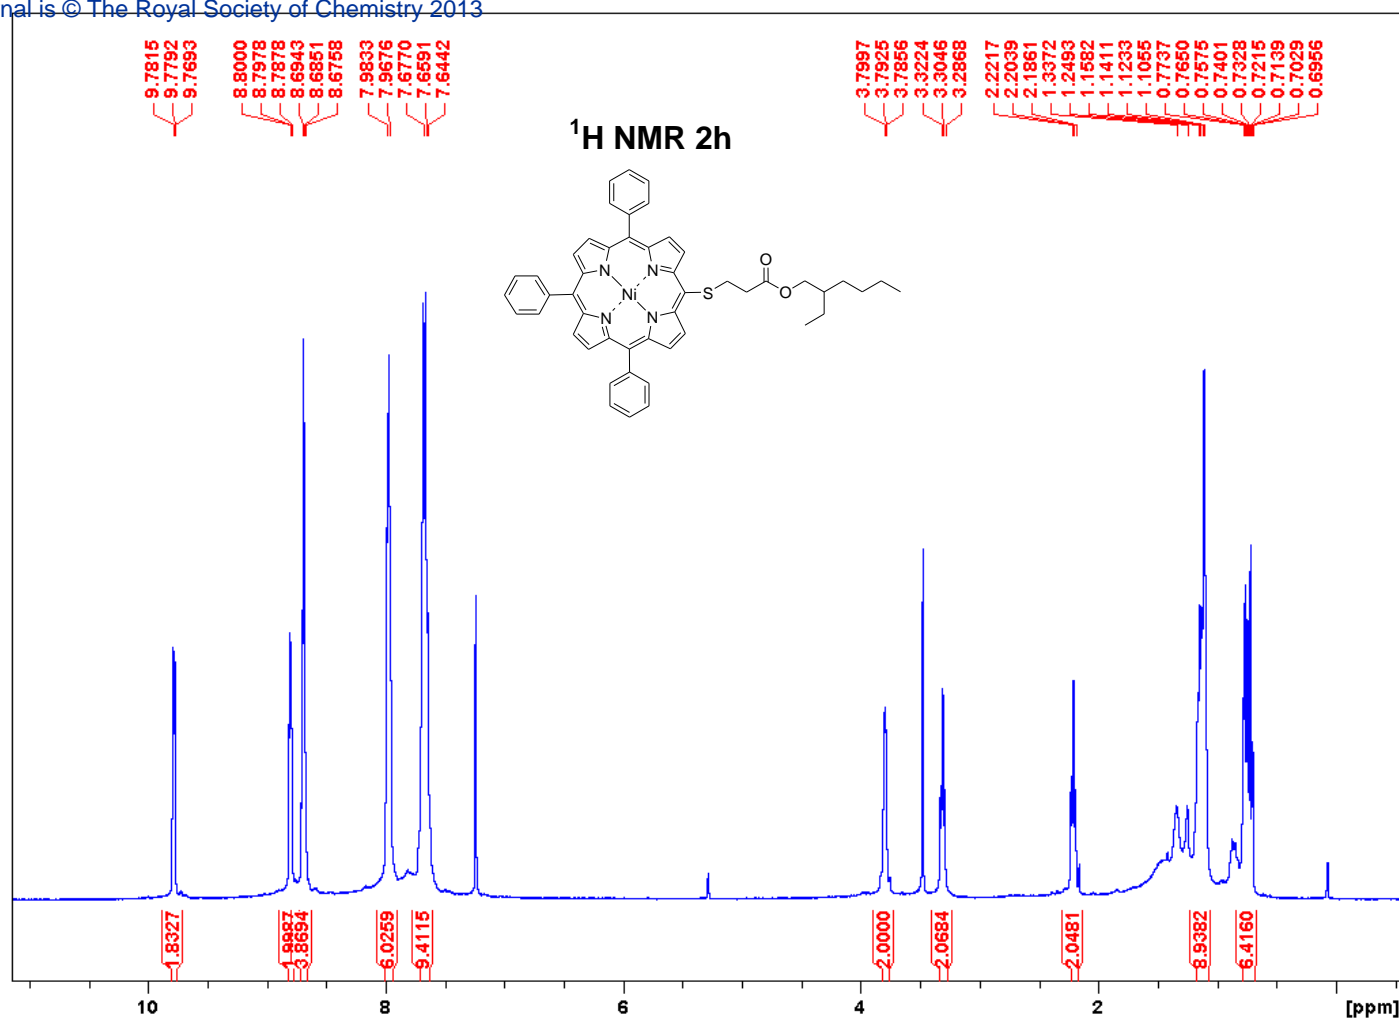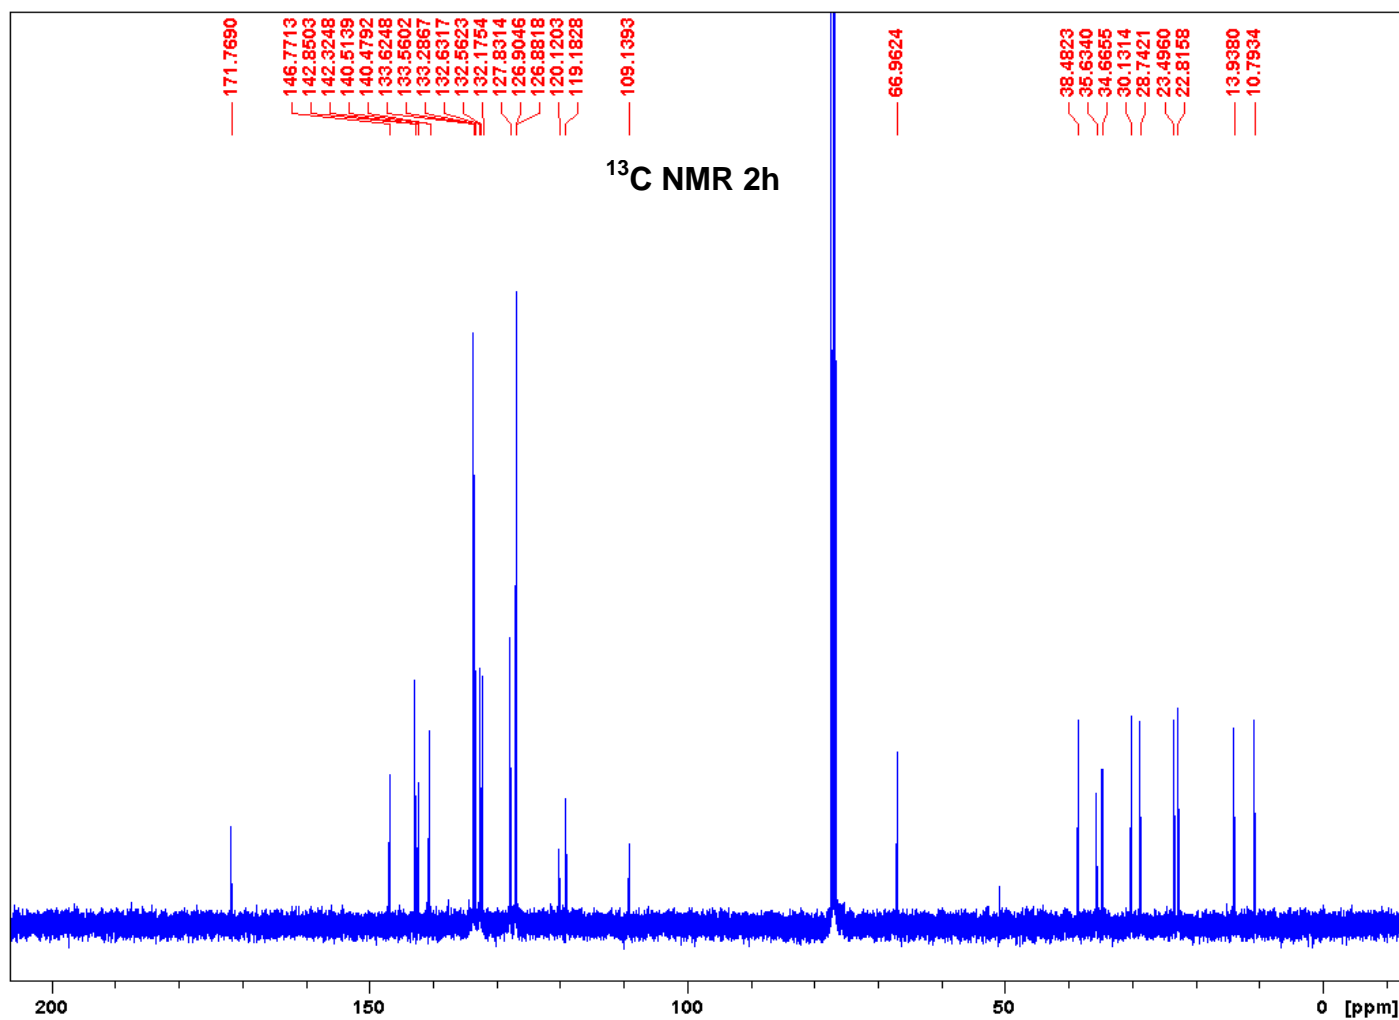

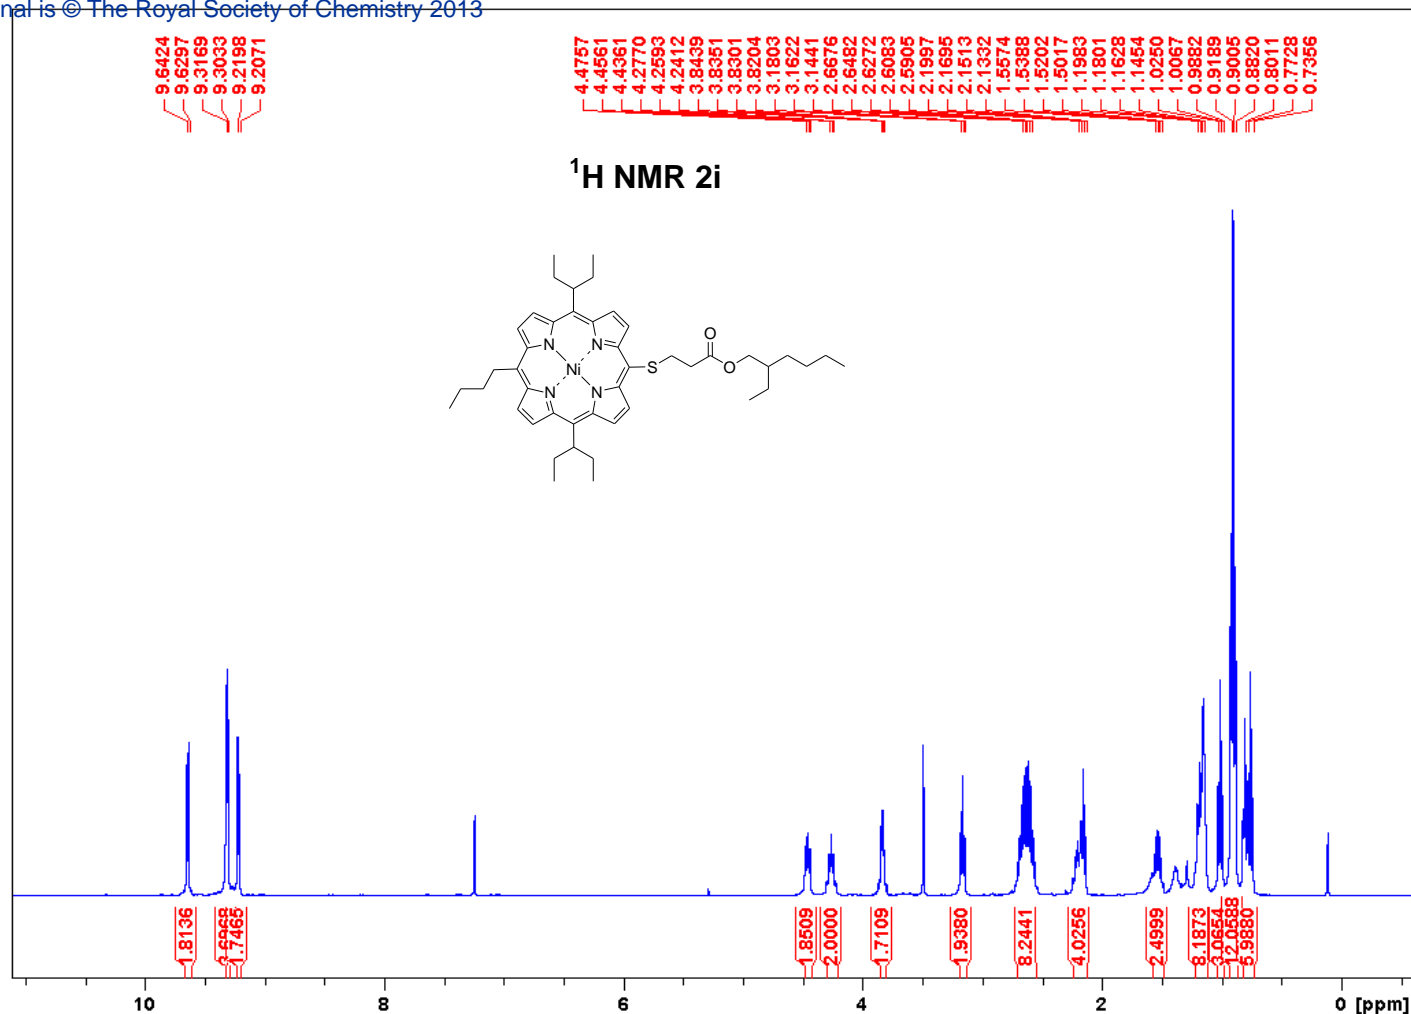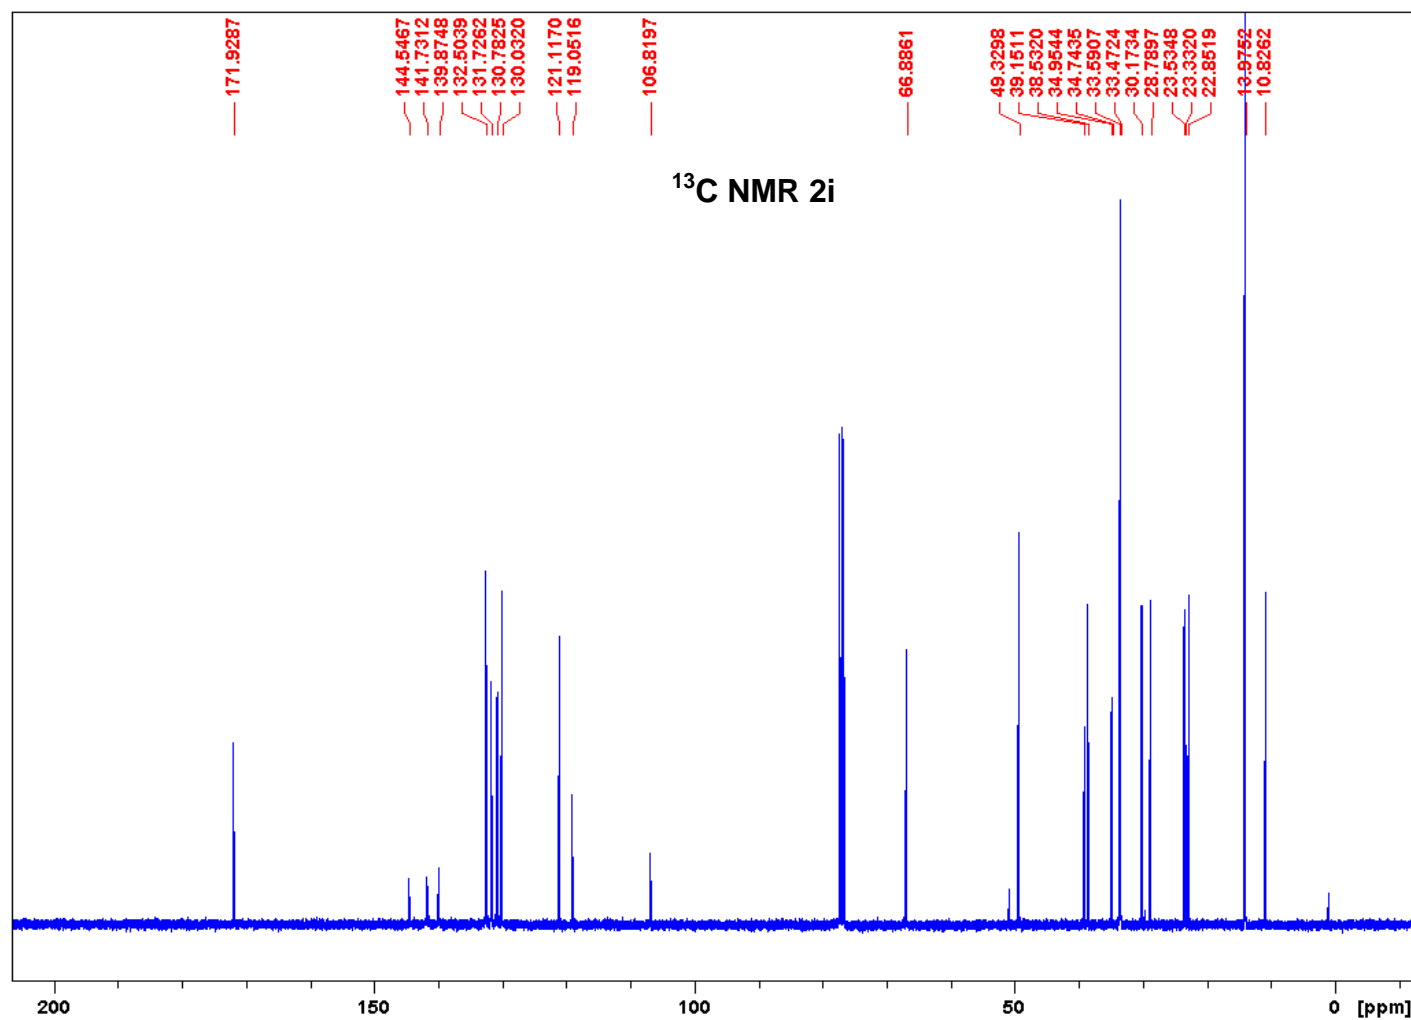

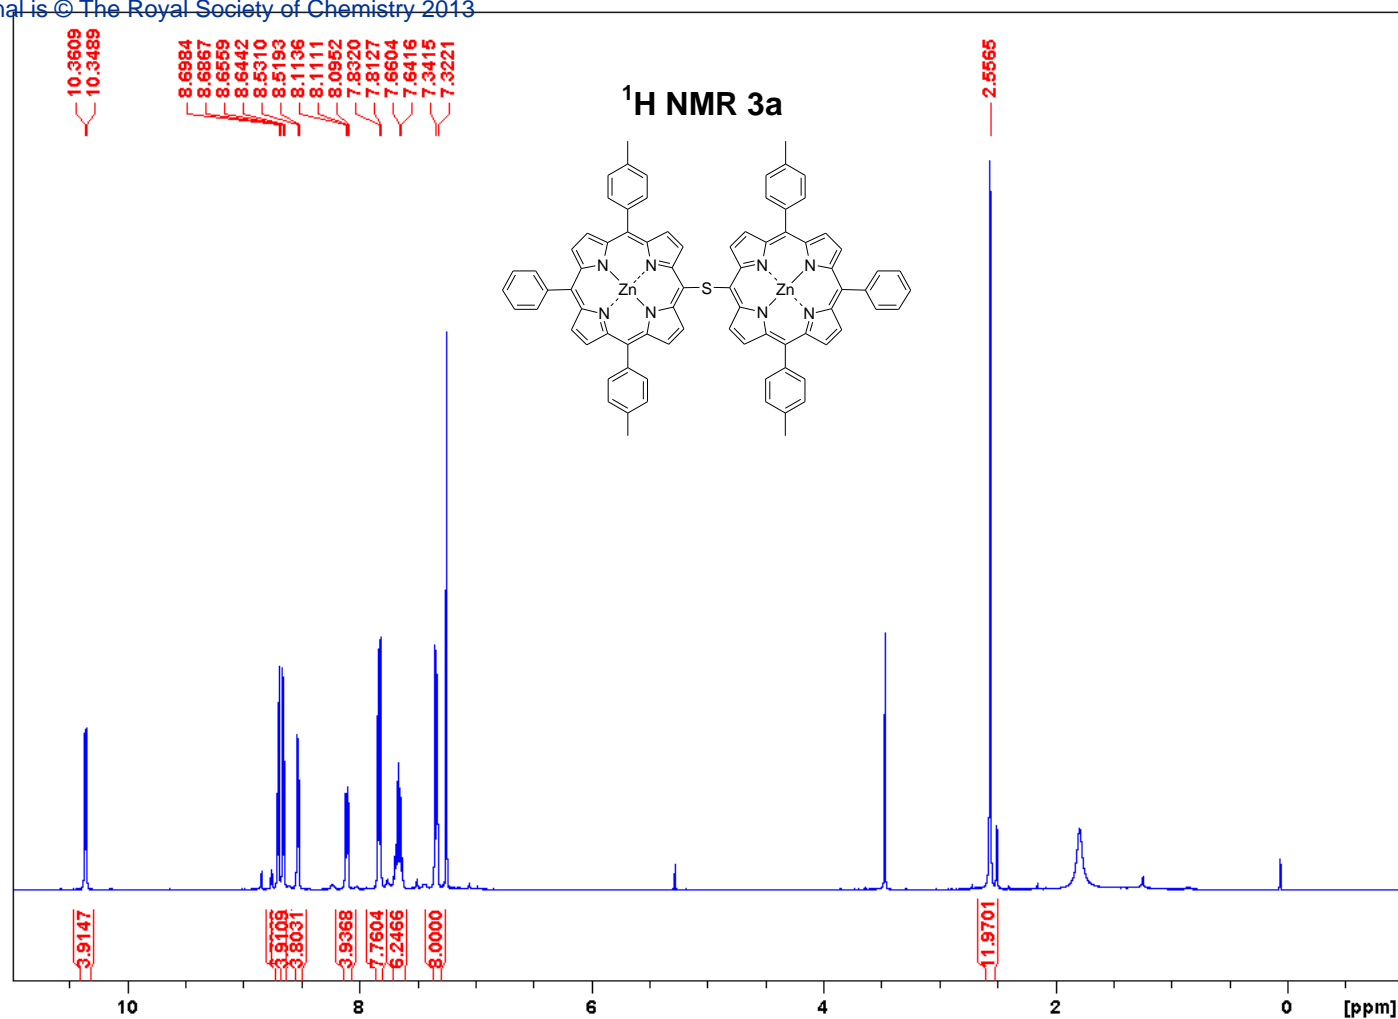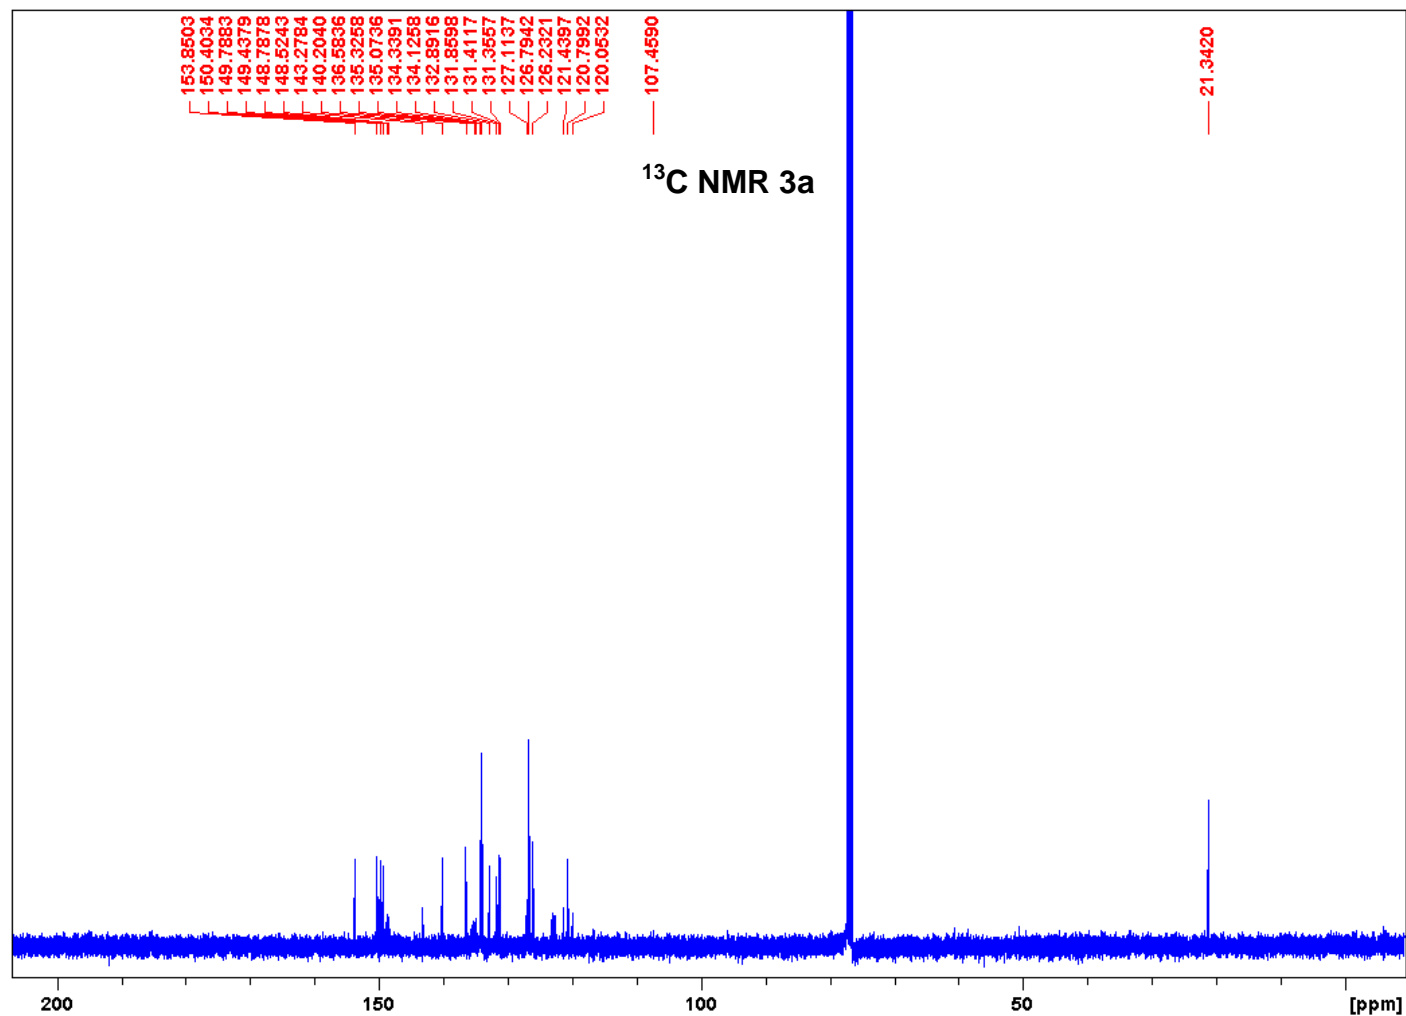

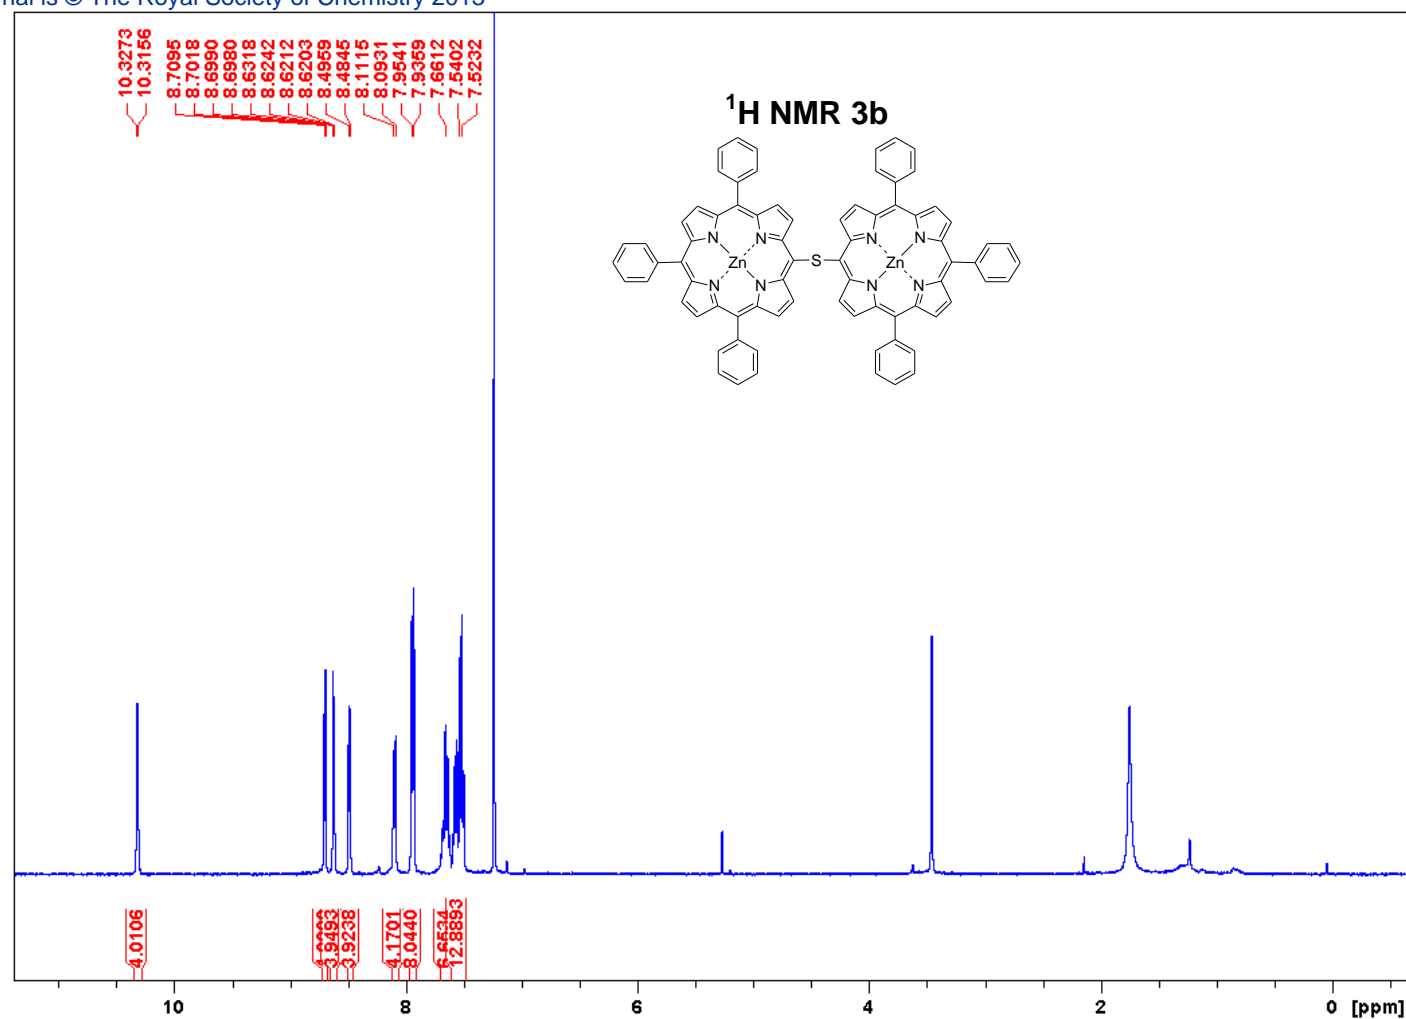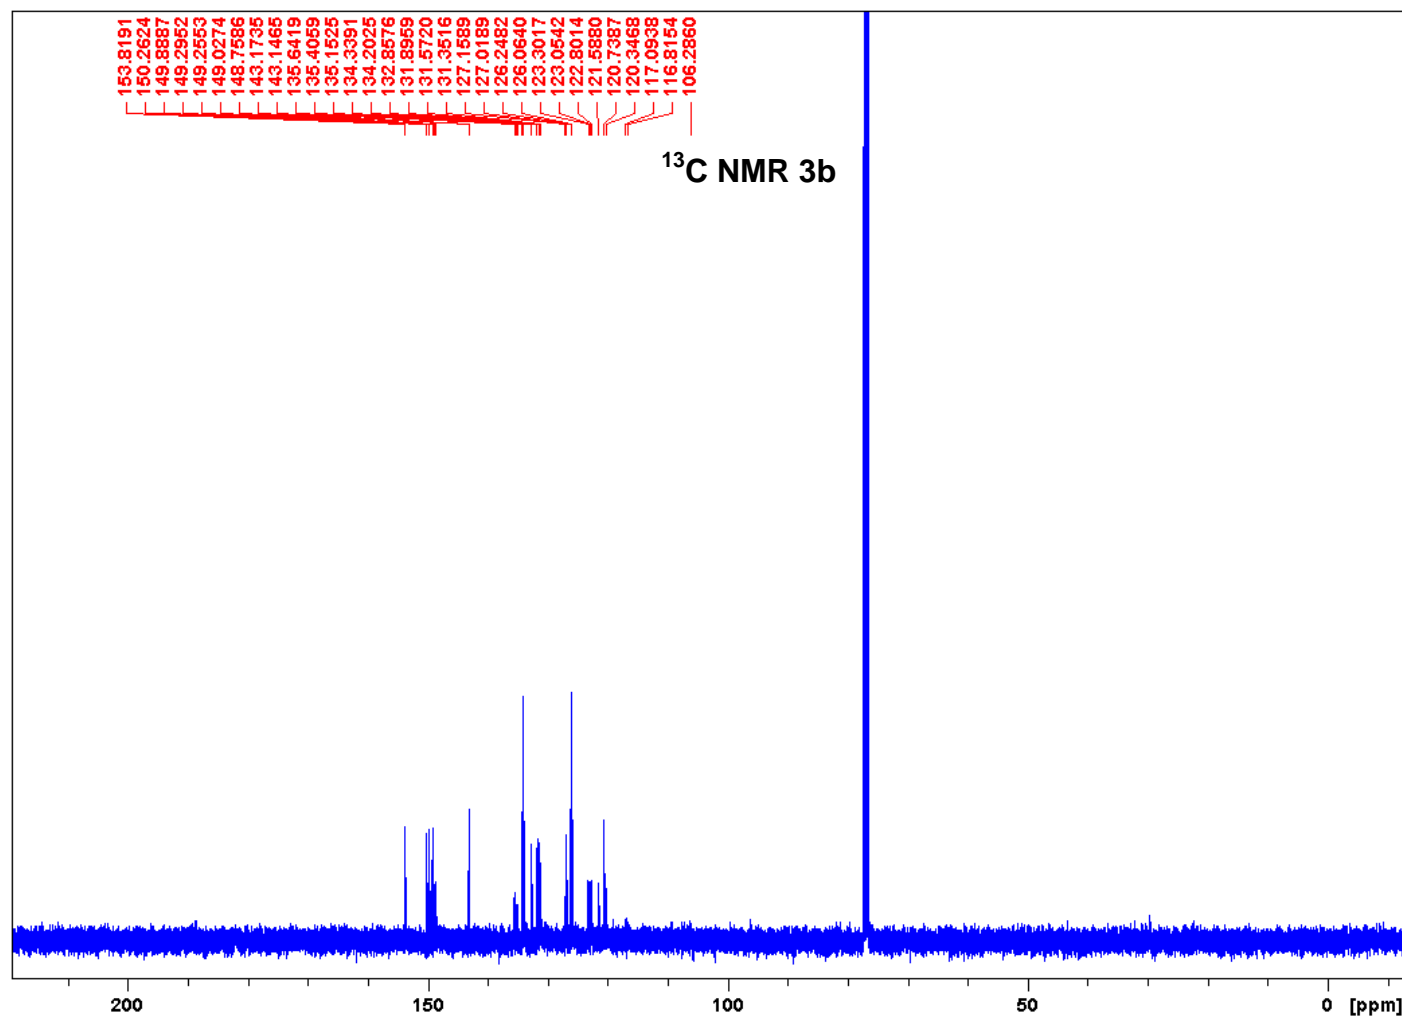



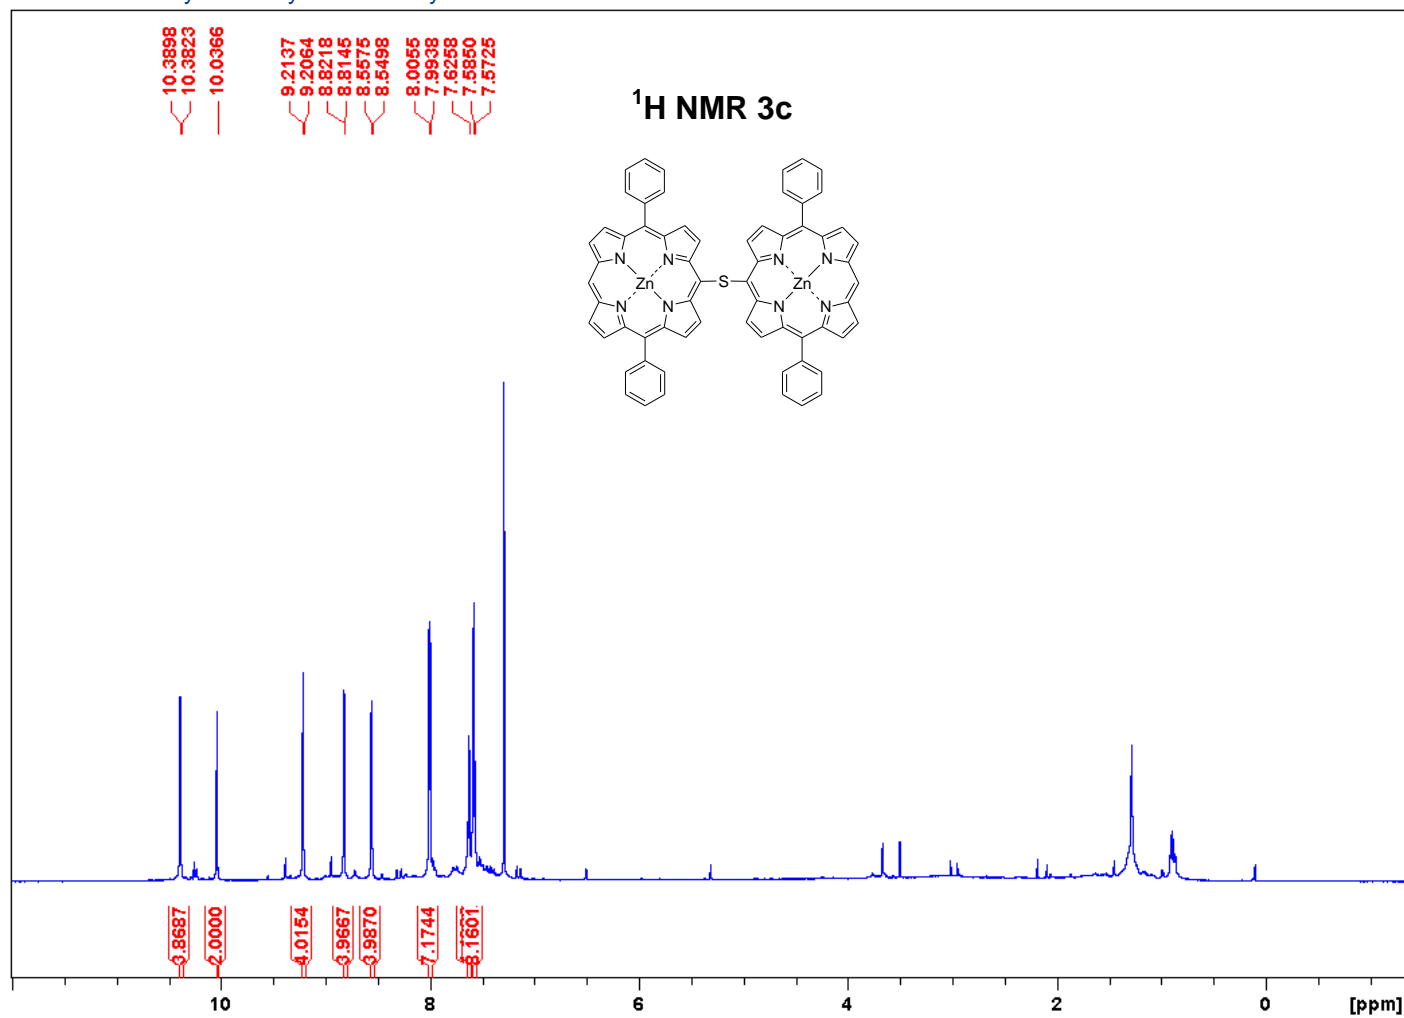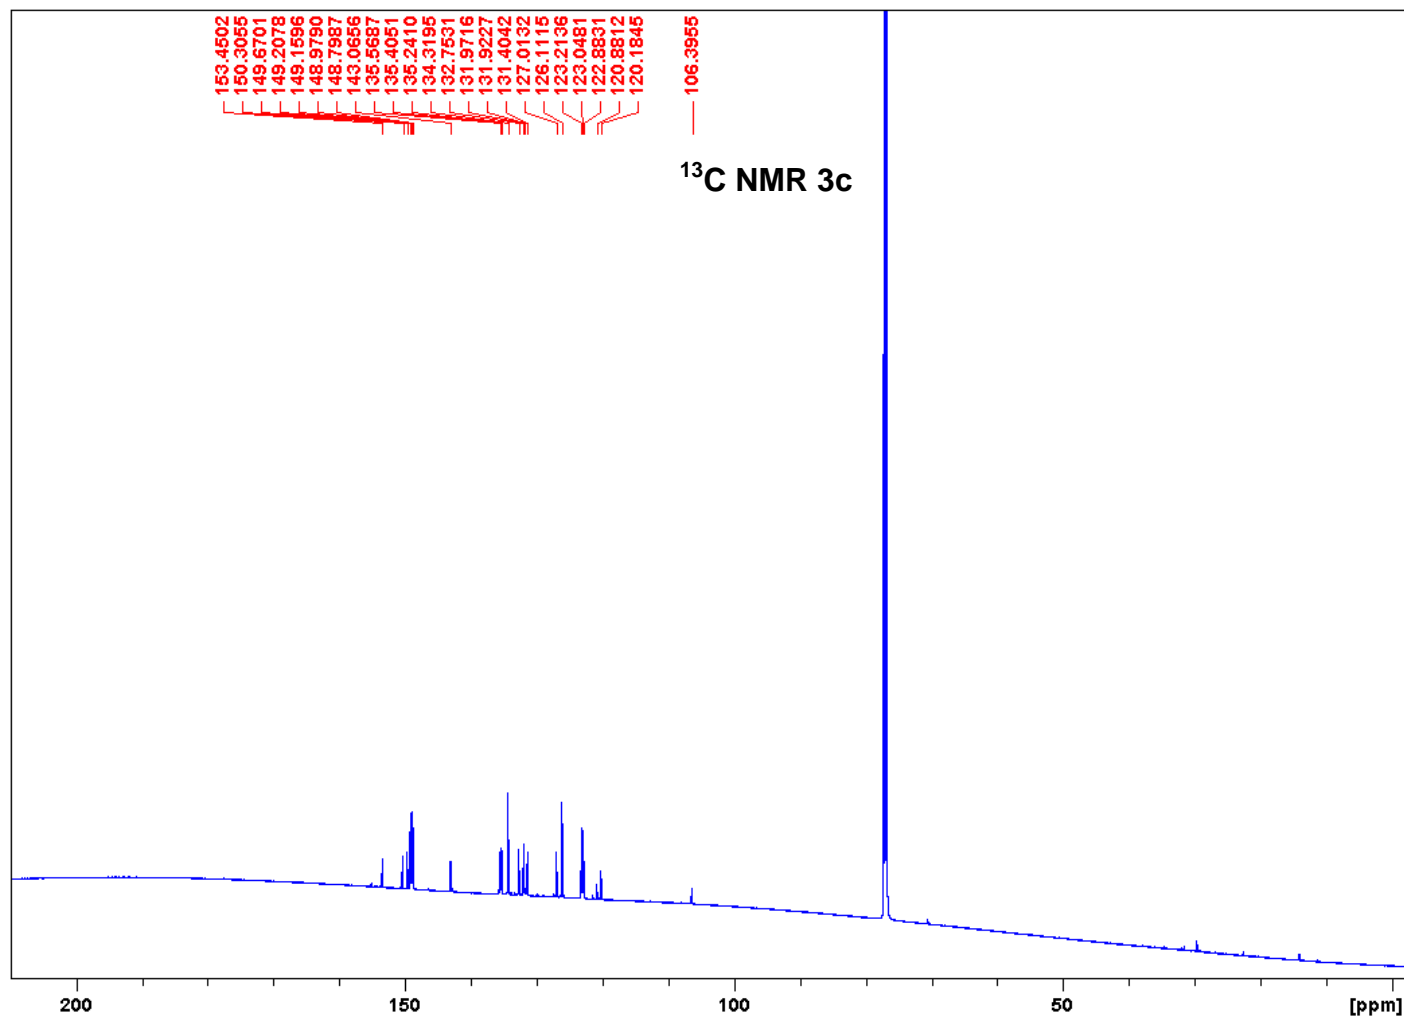

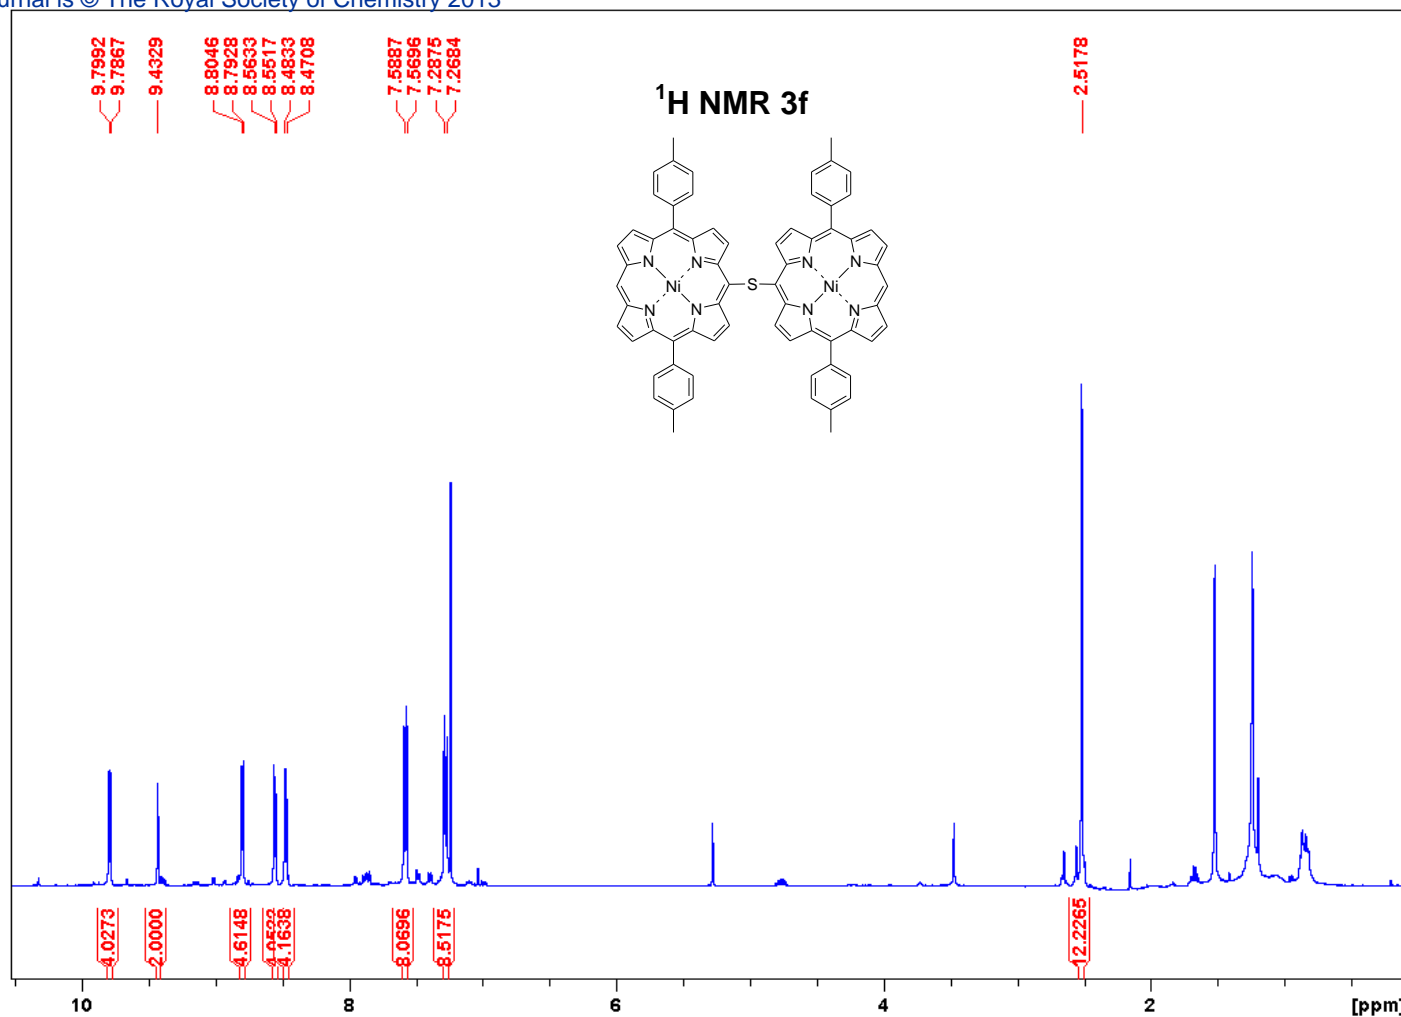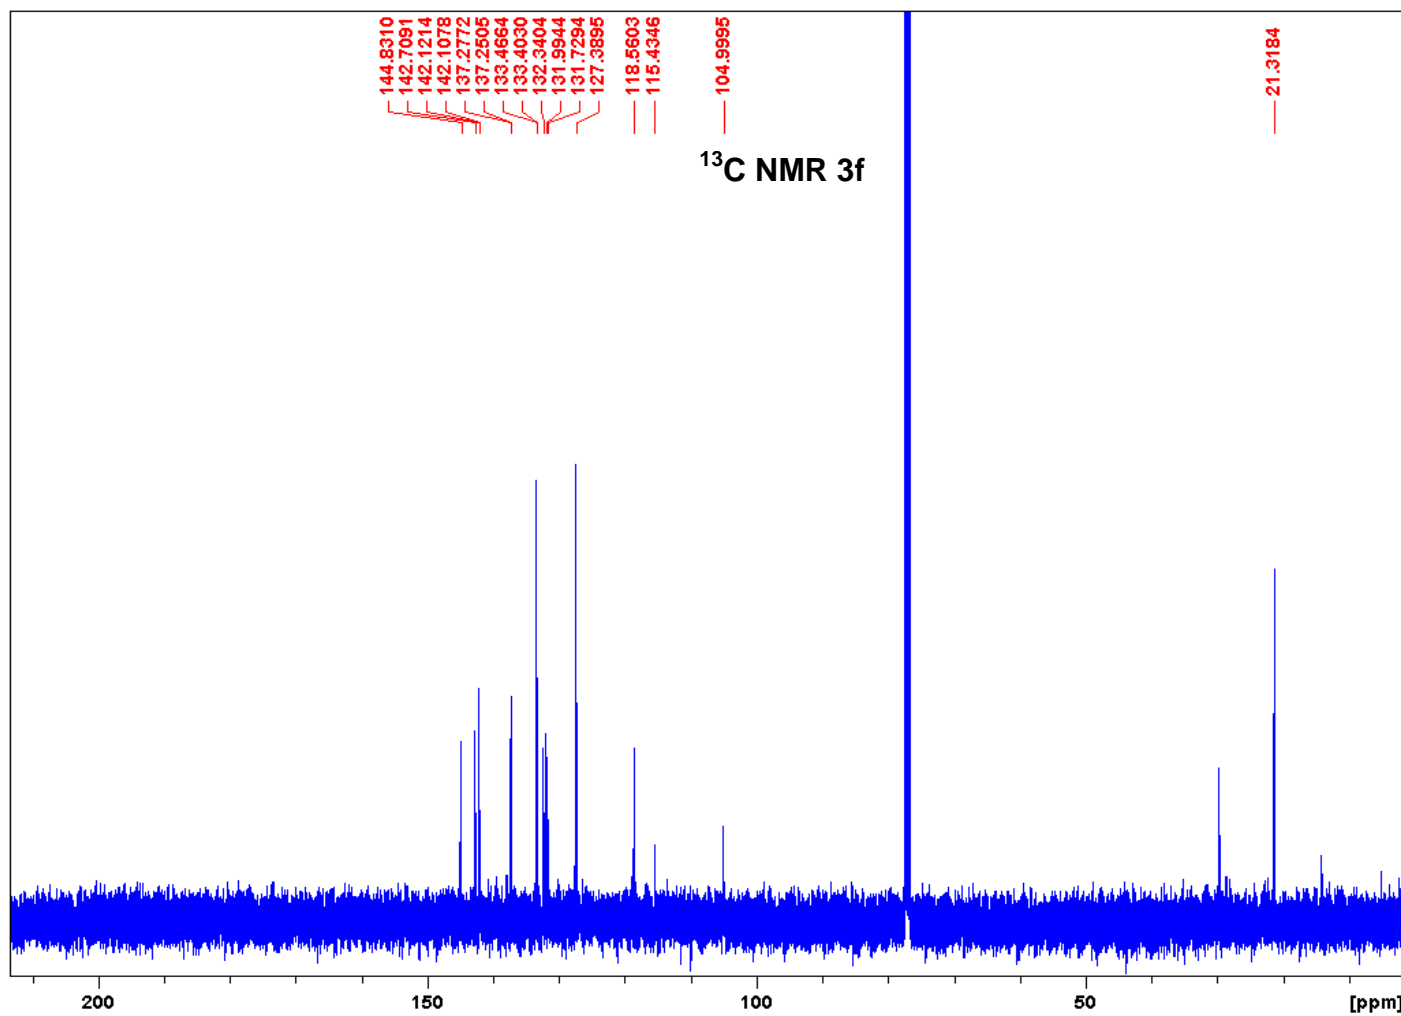

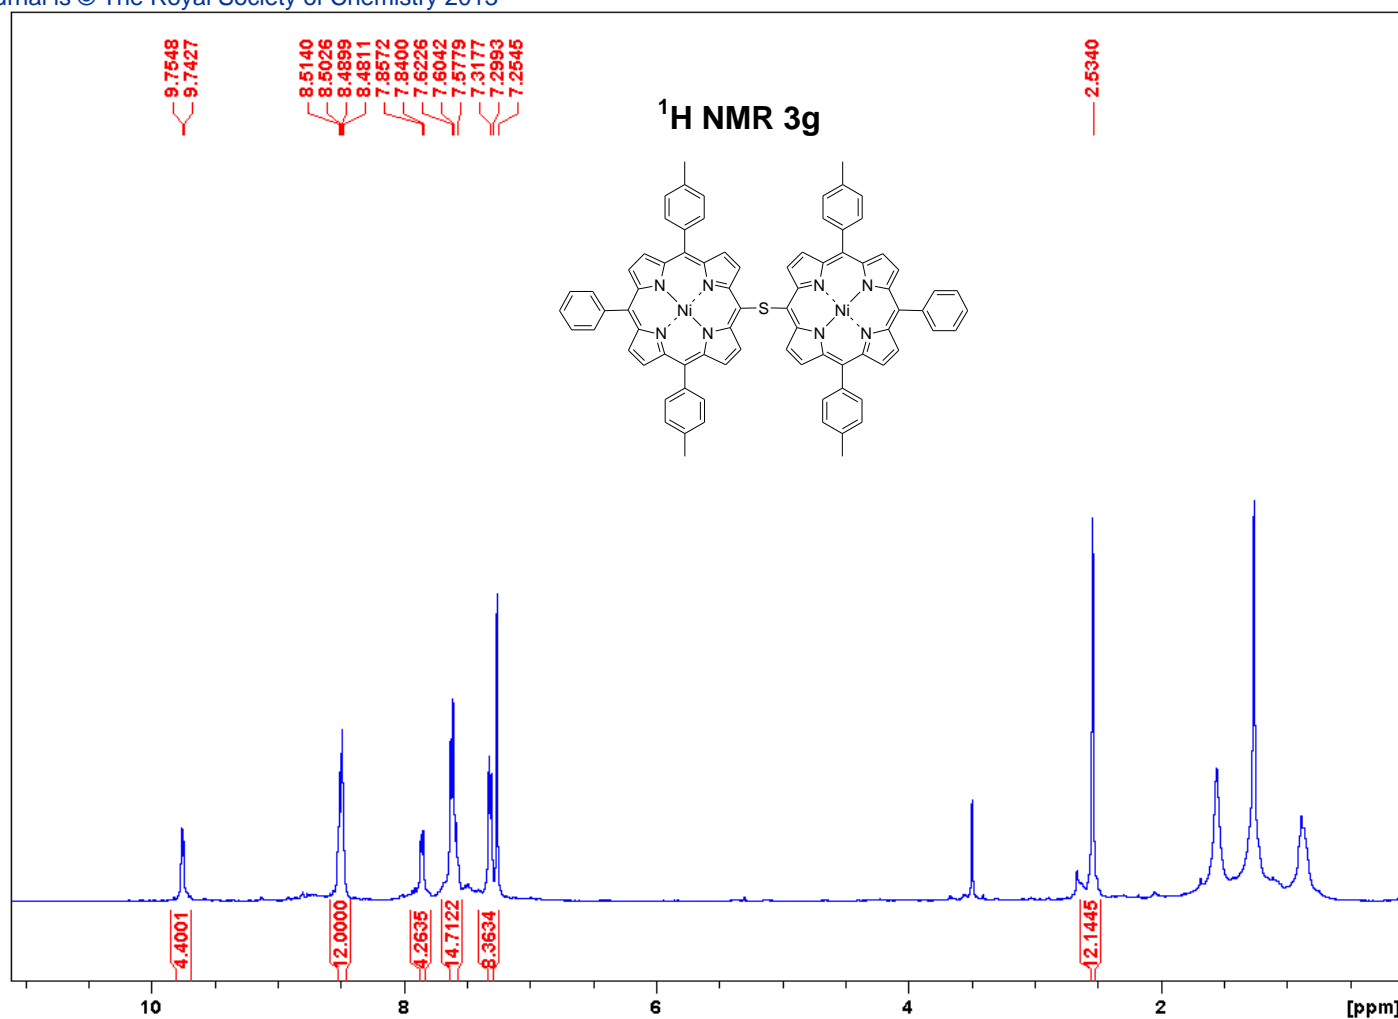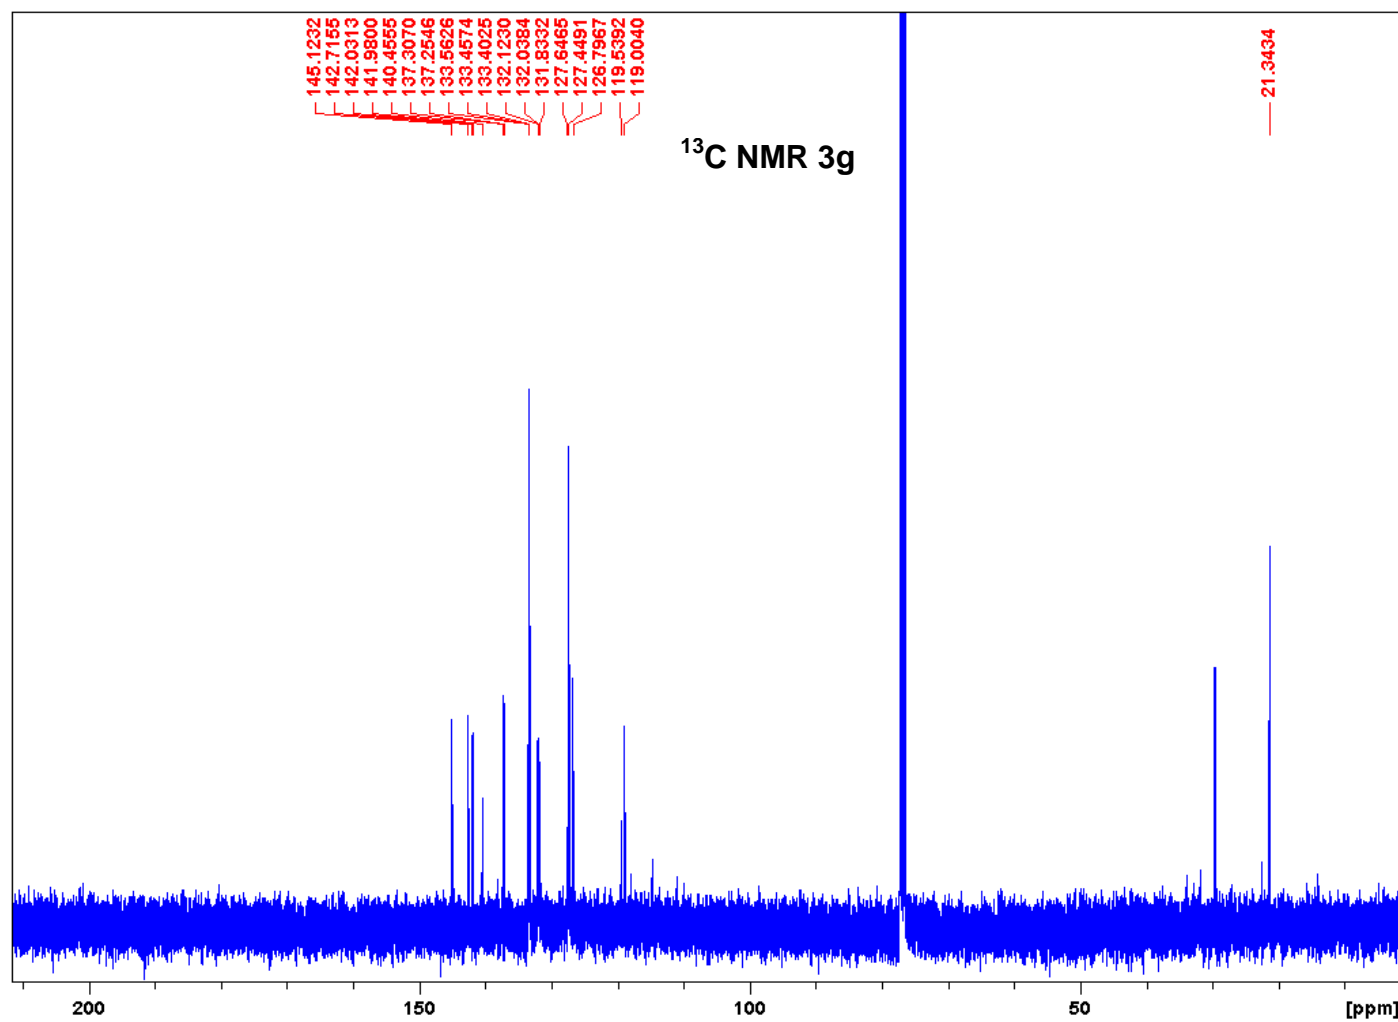

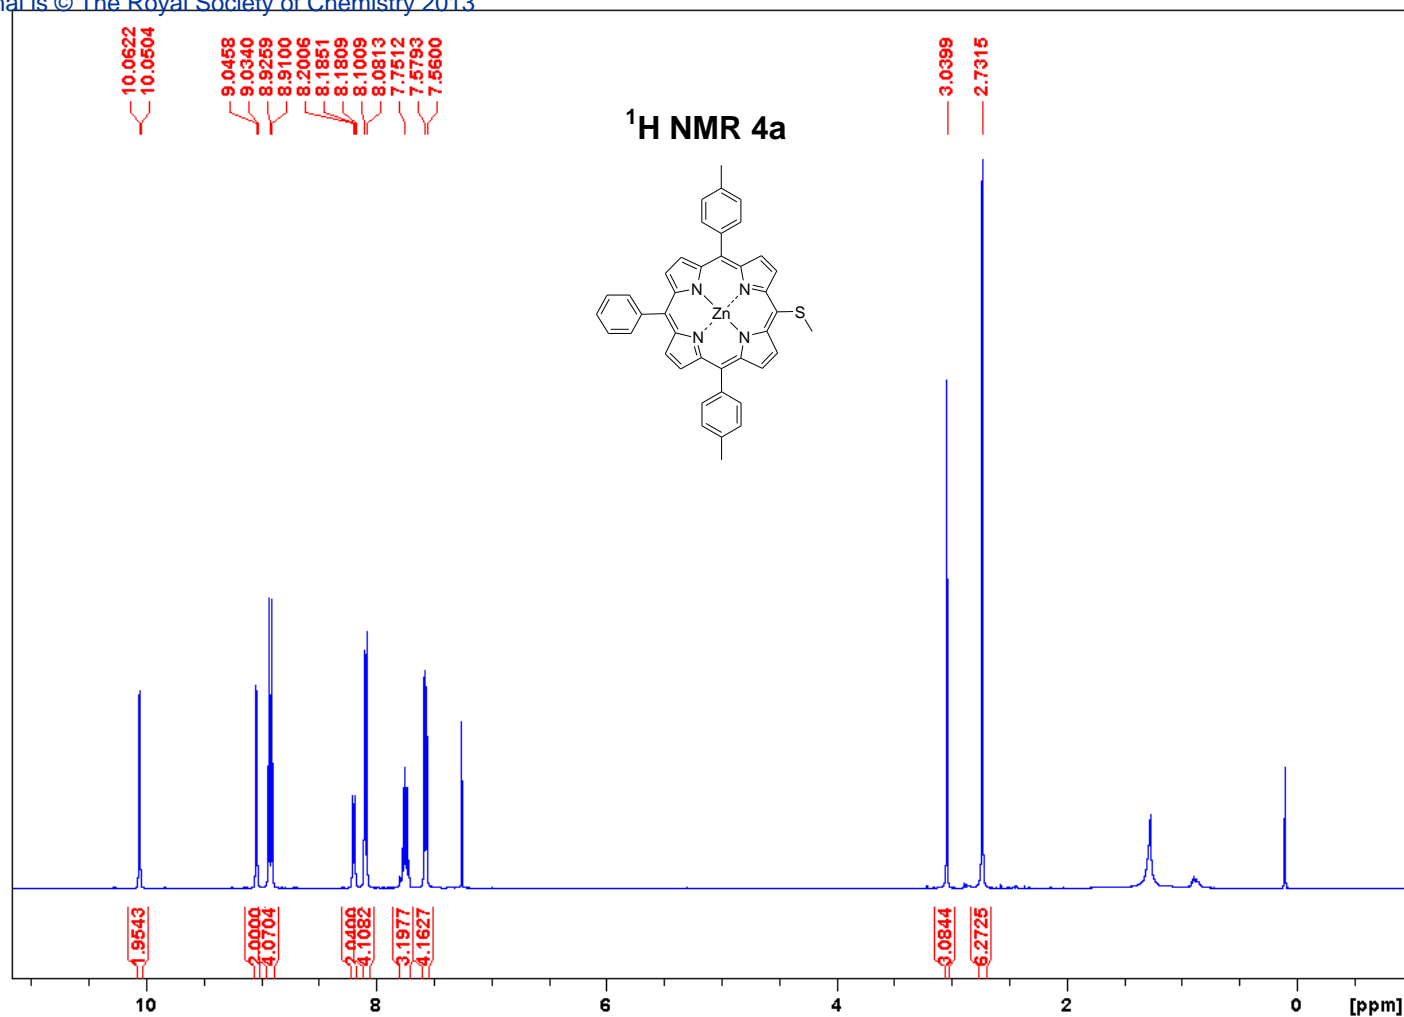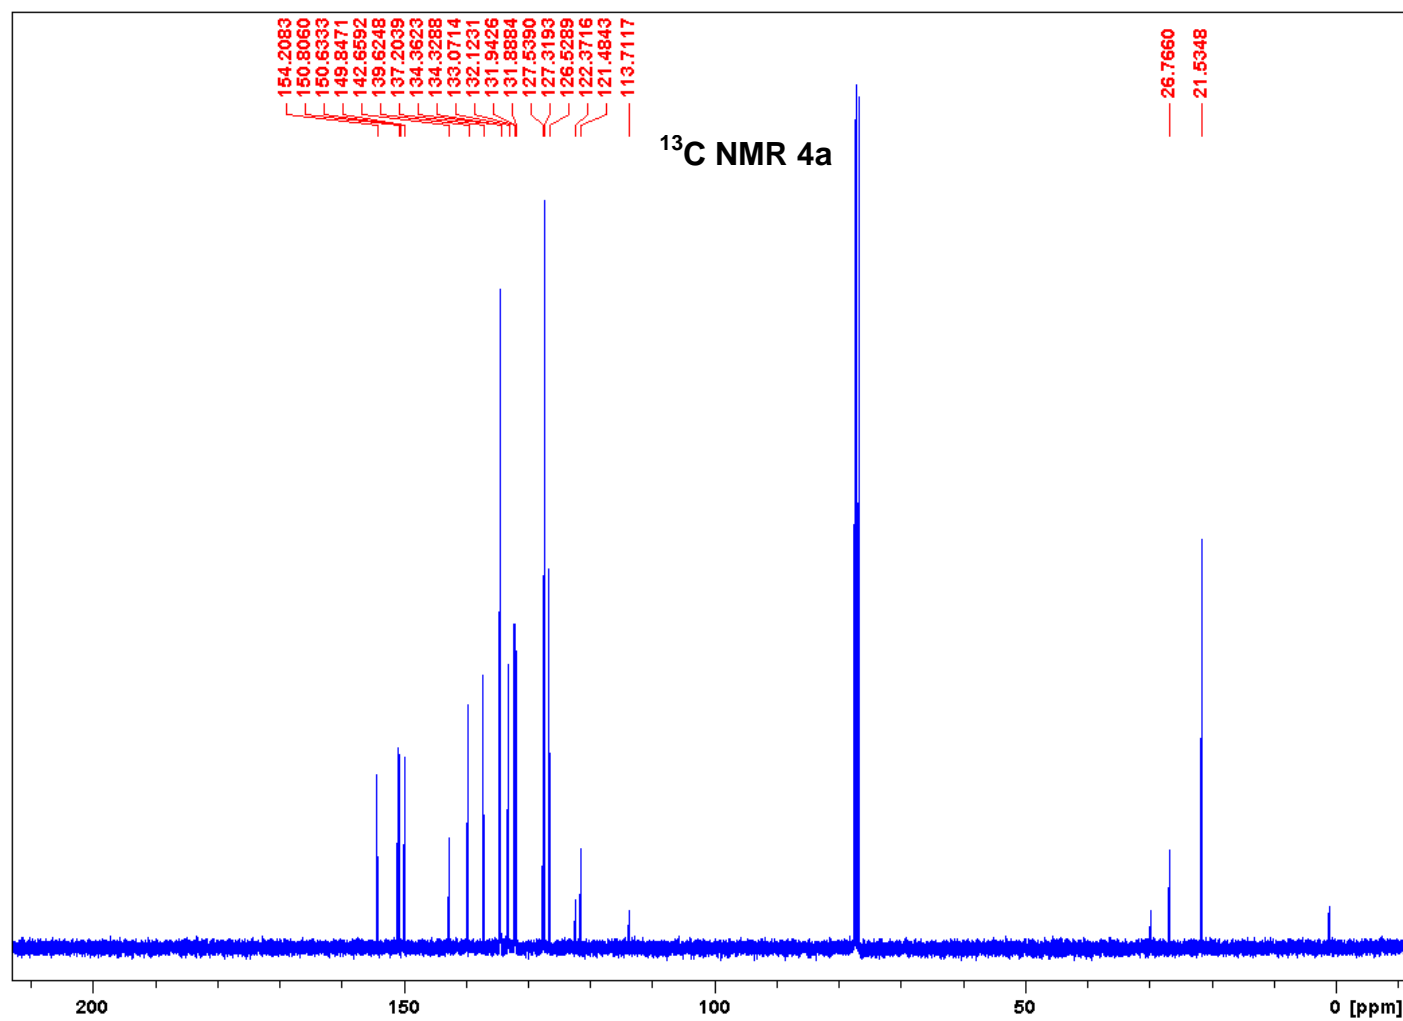

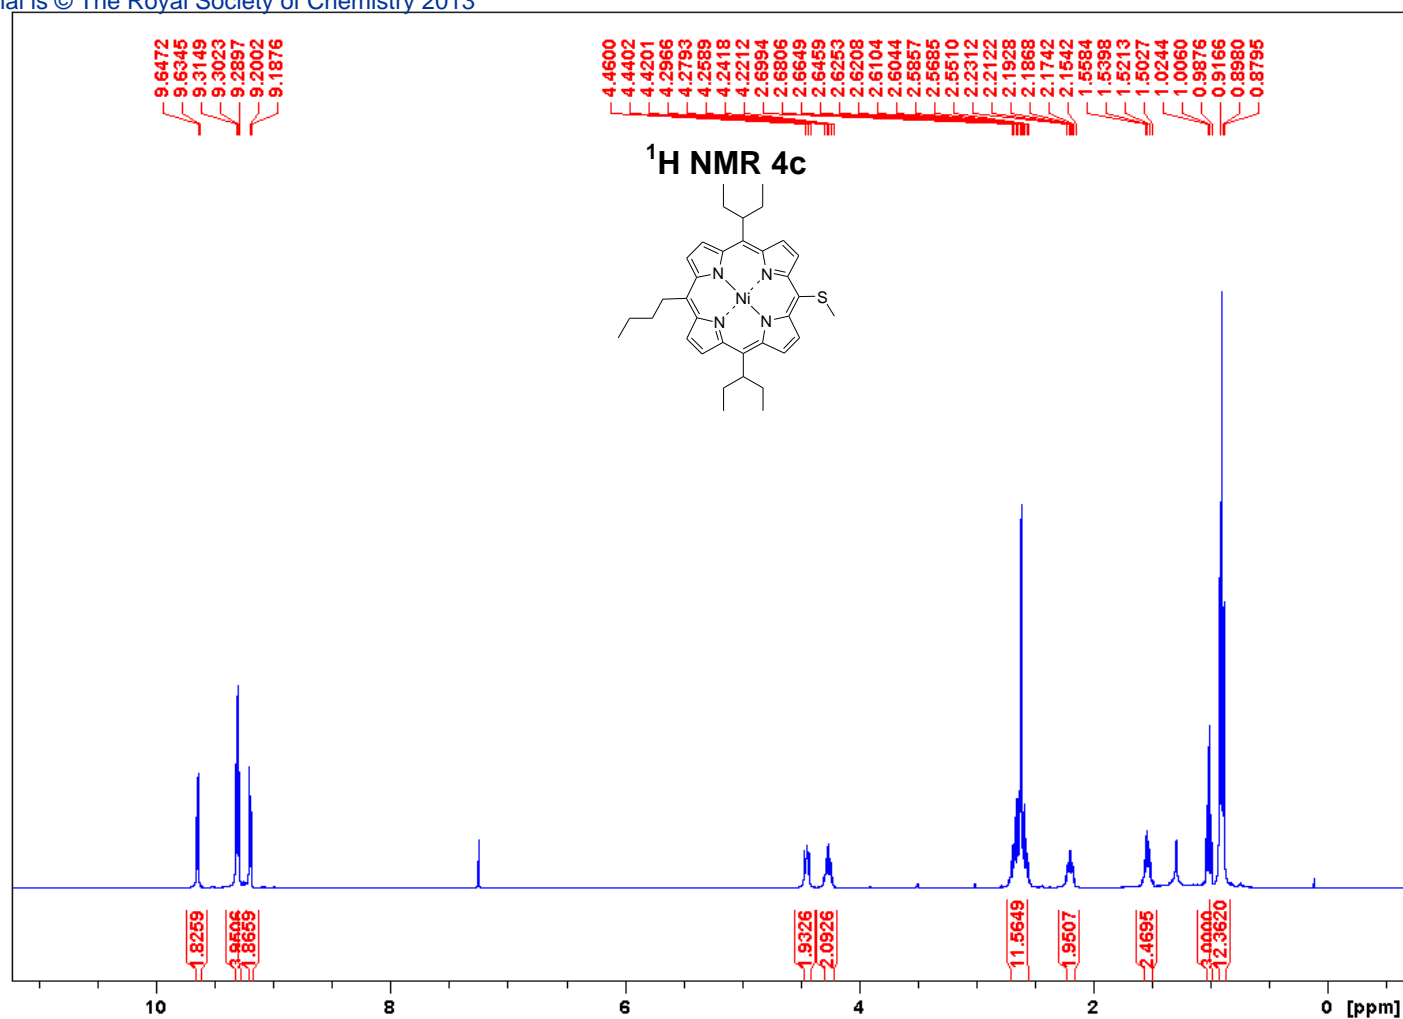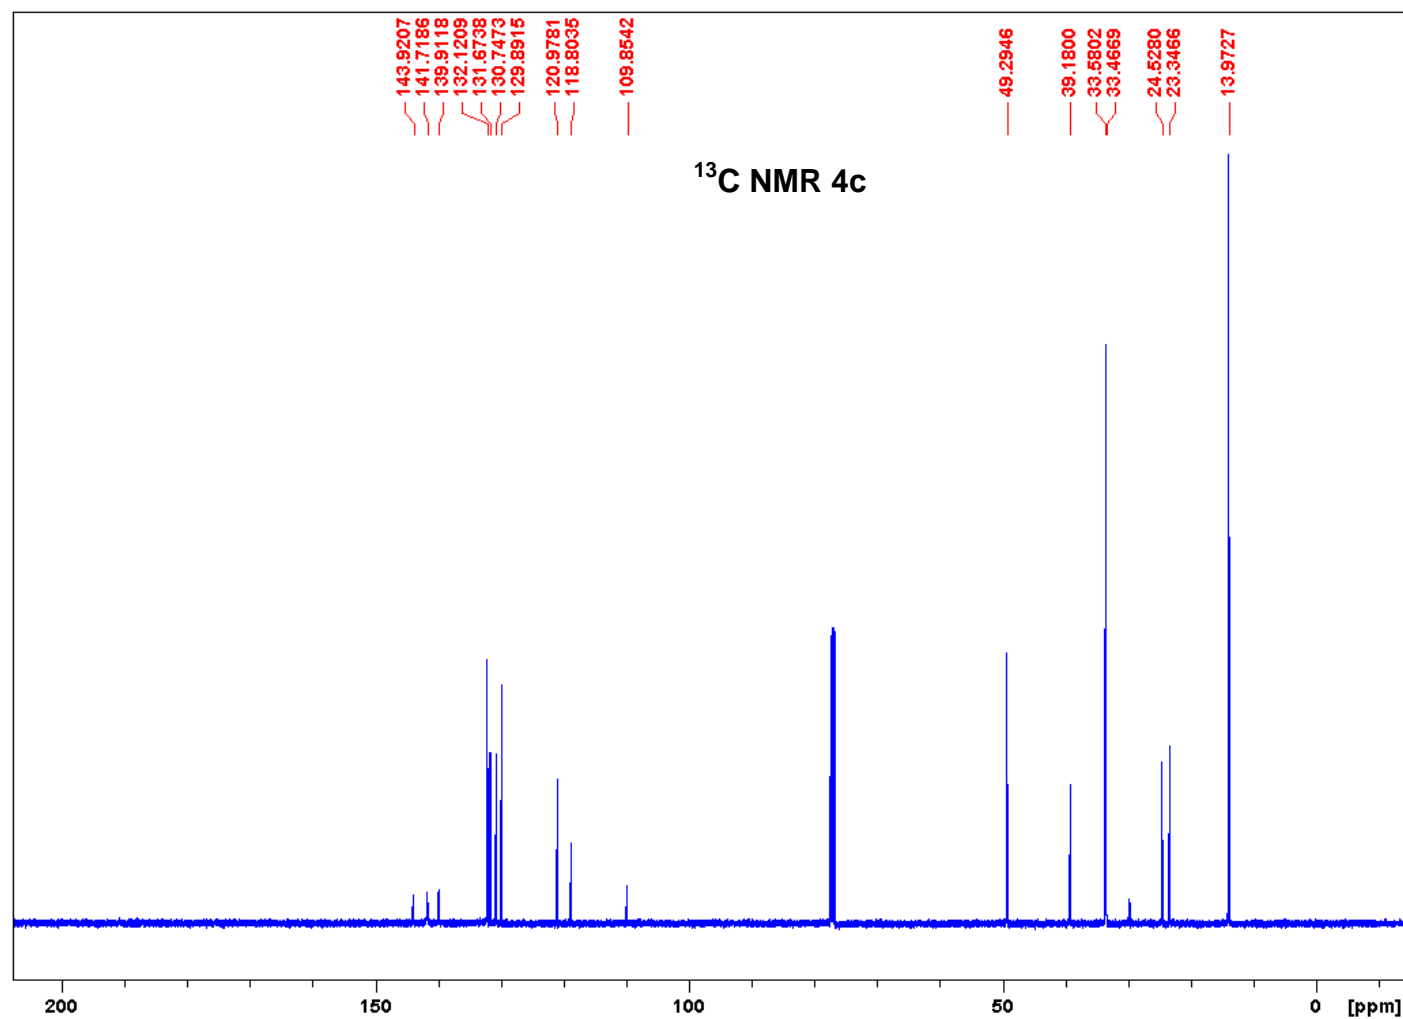



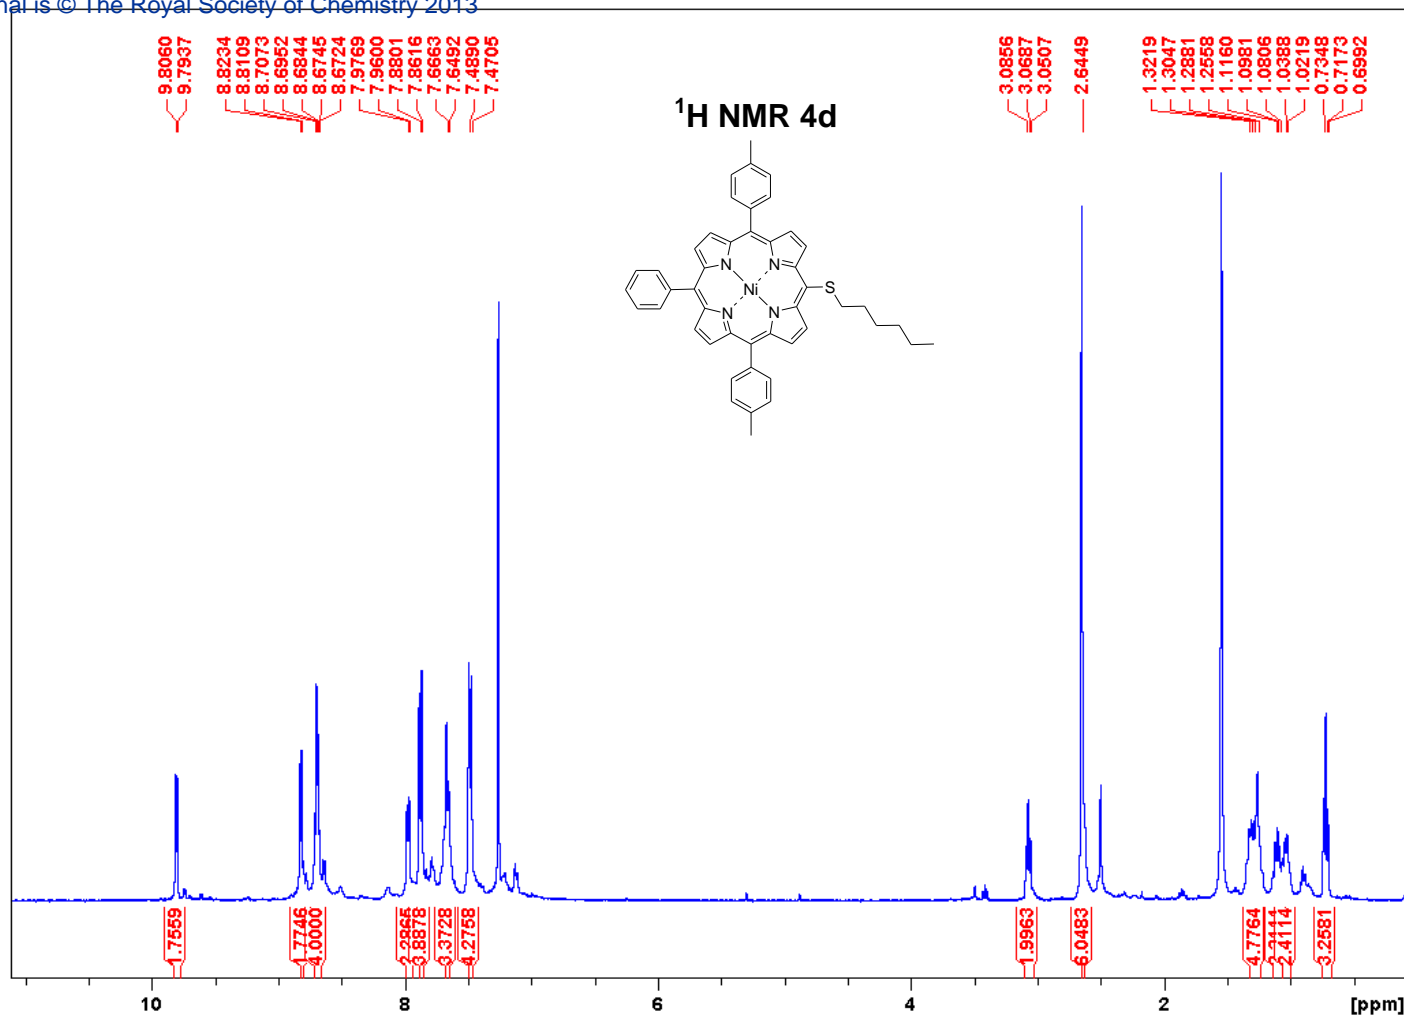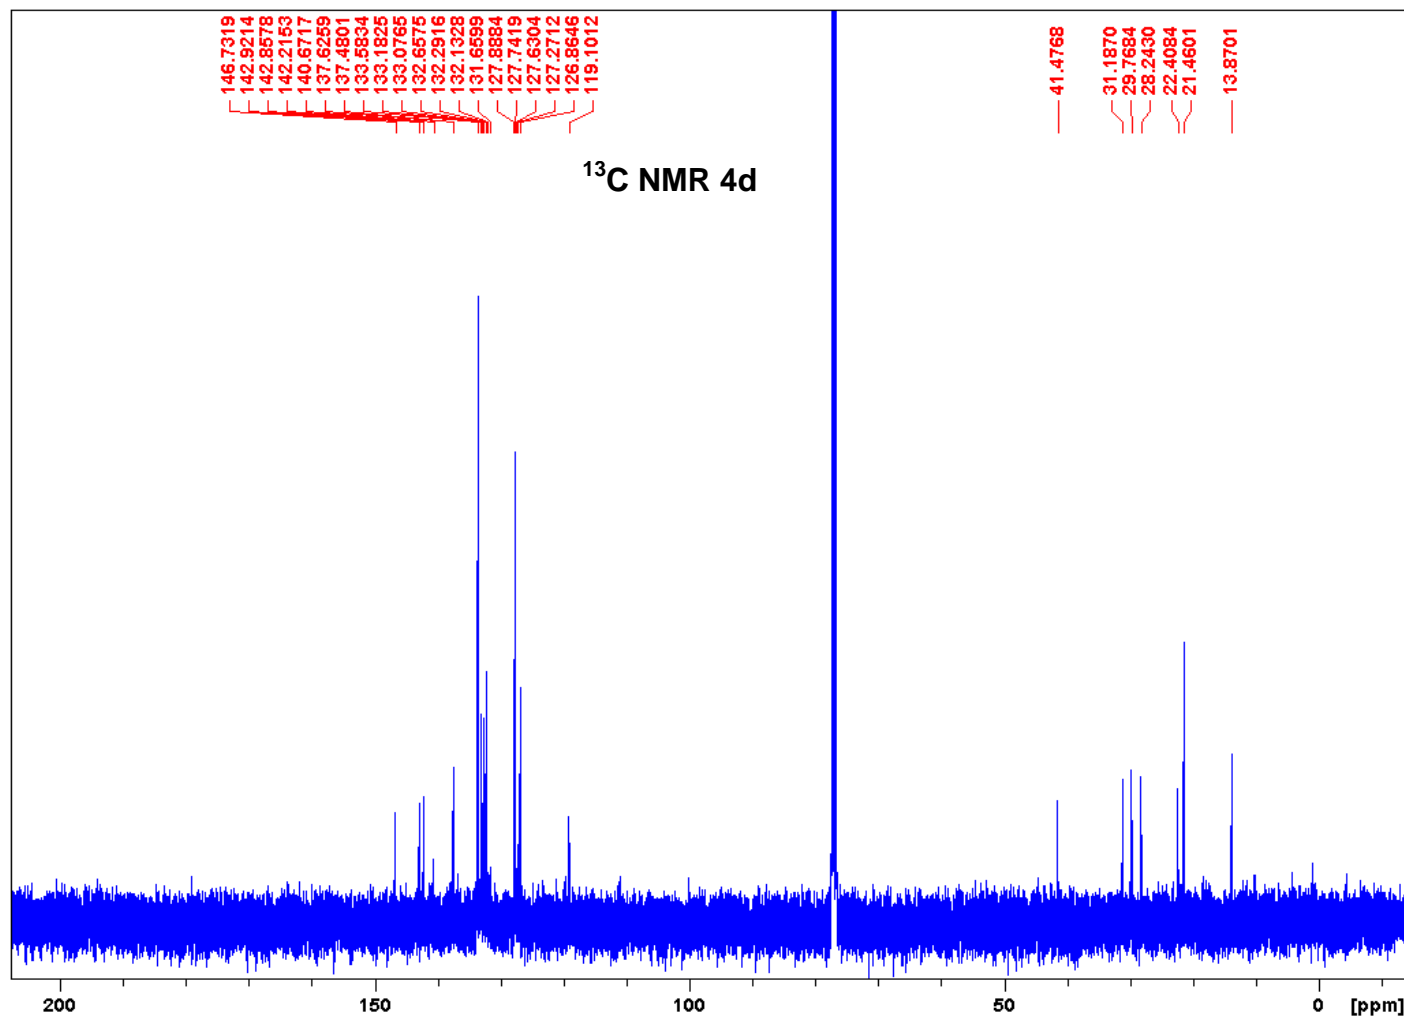

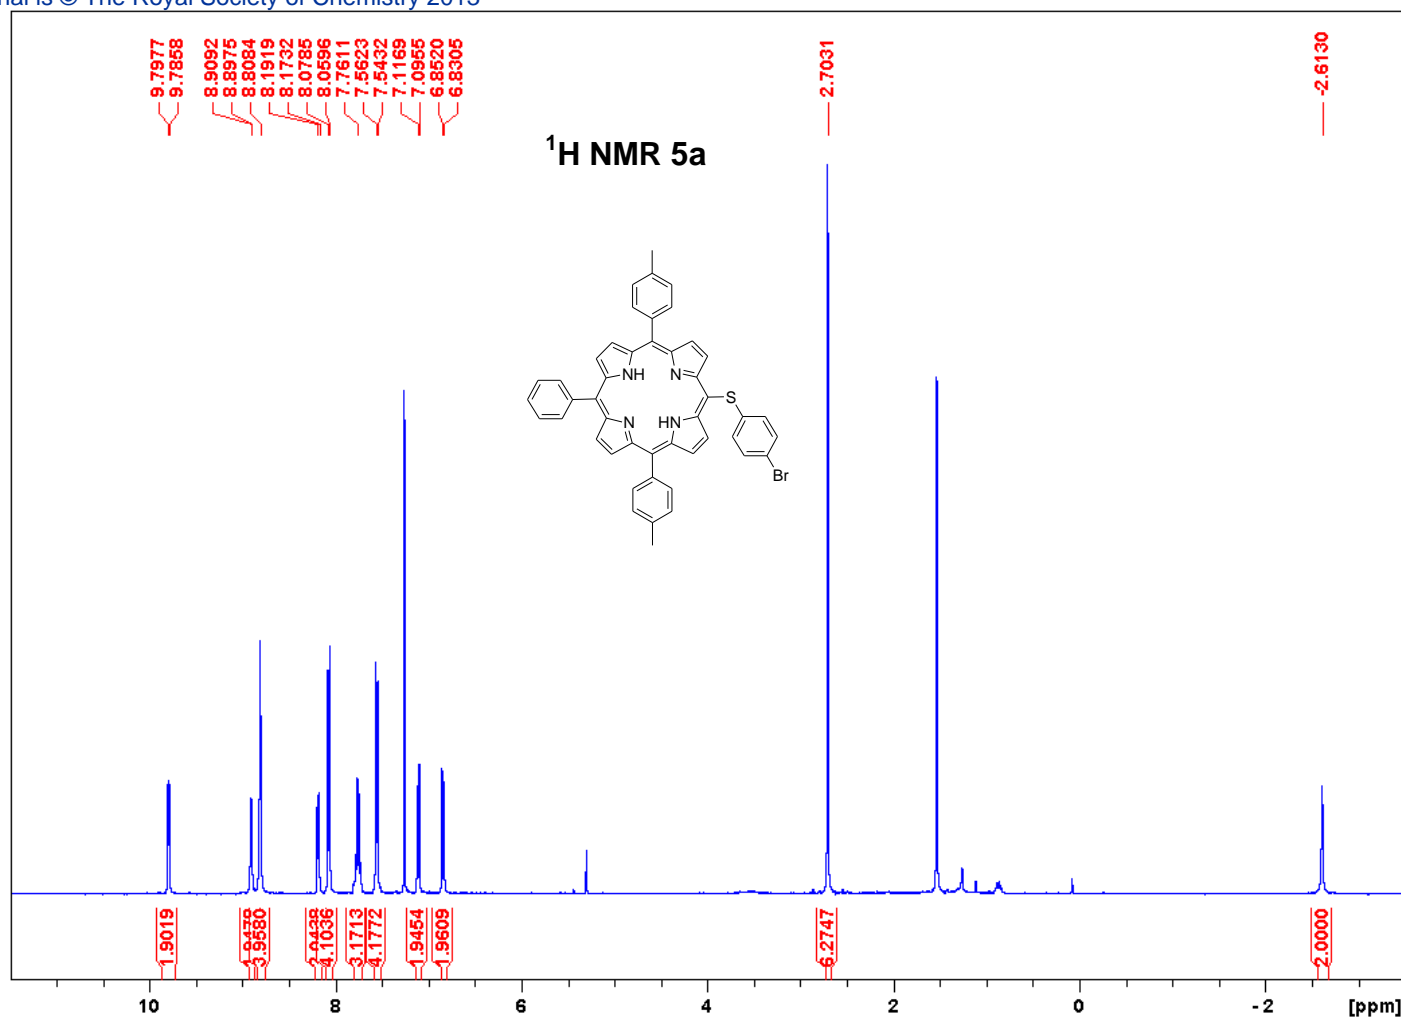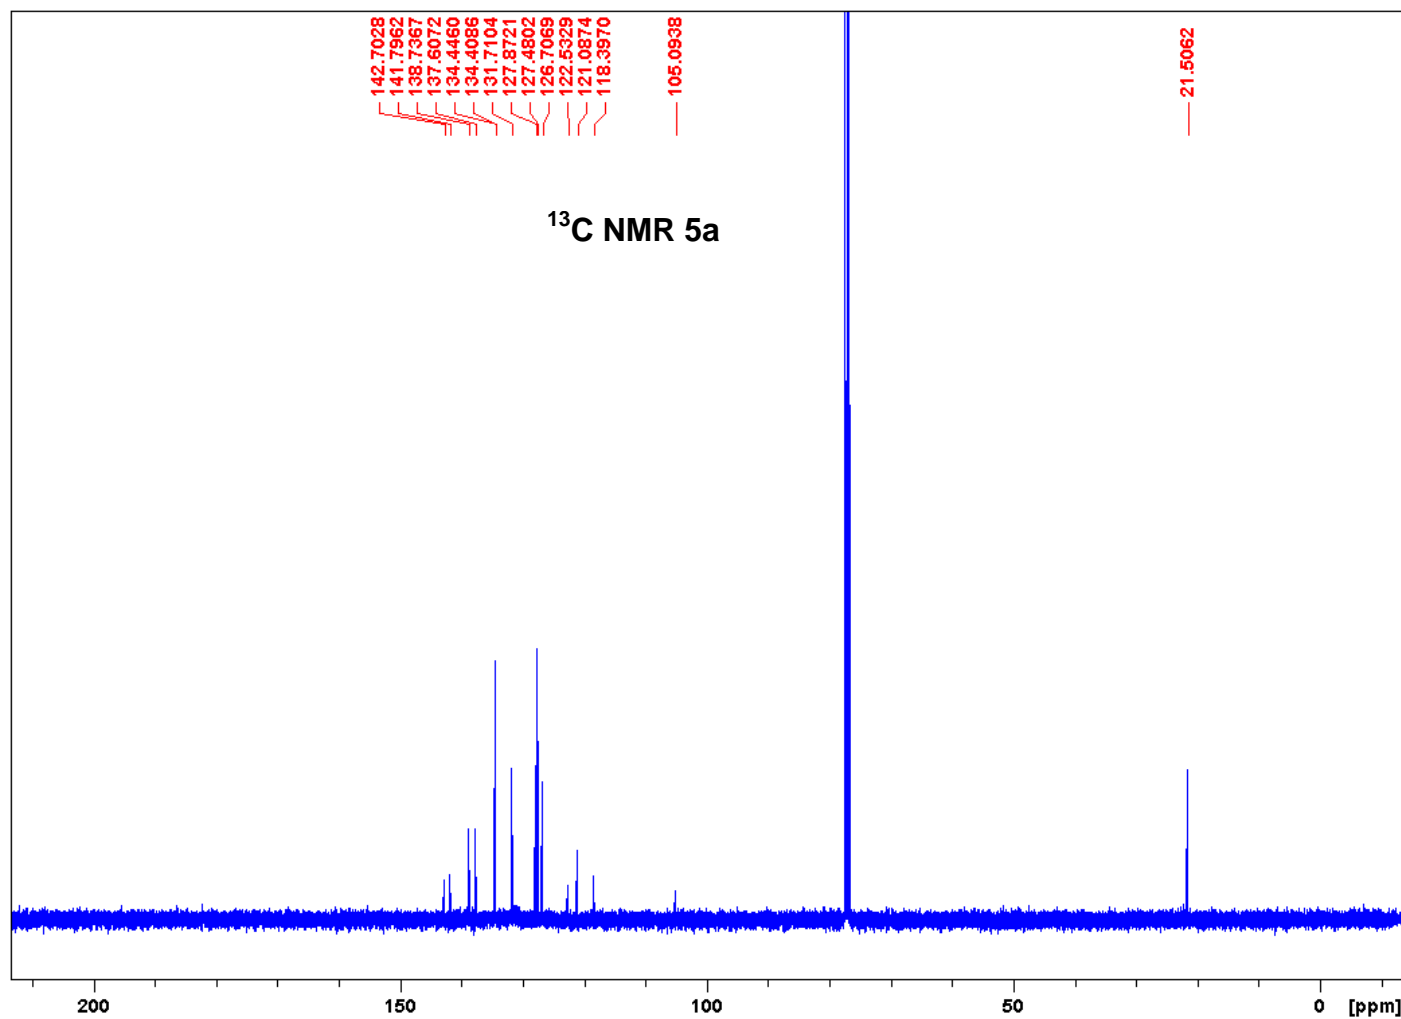

# Proposed mechanism for the deprotection of the thioether chain and $S_NAr$ for sulfur-linked bisporphyrin formation

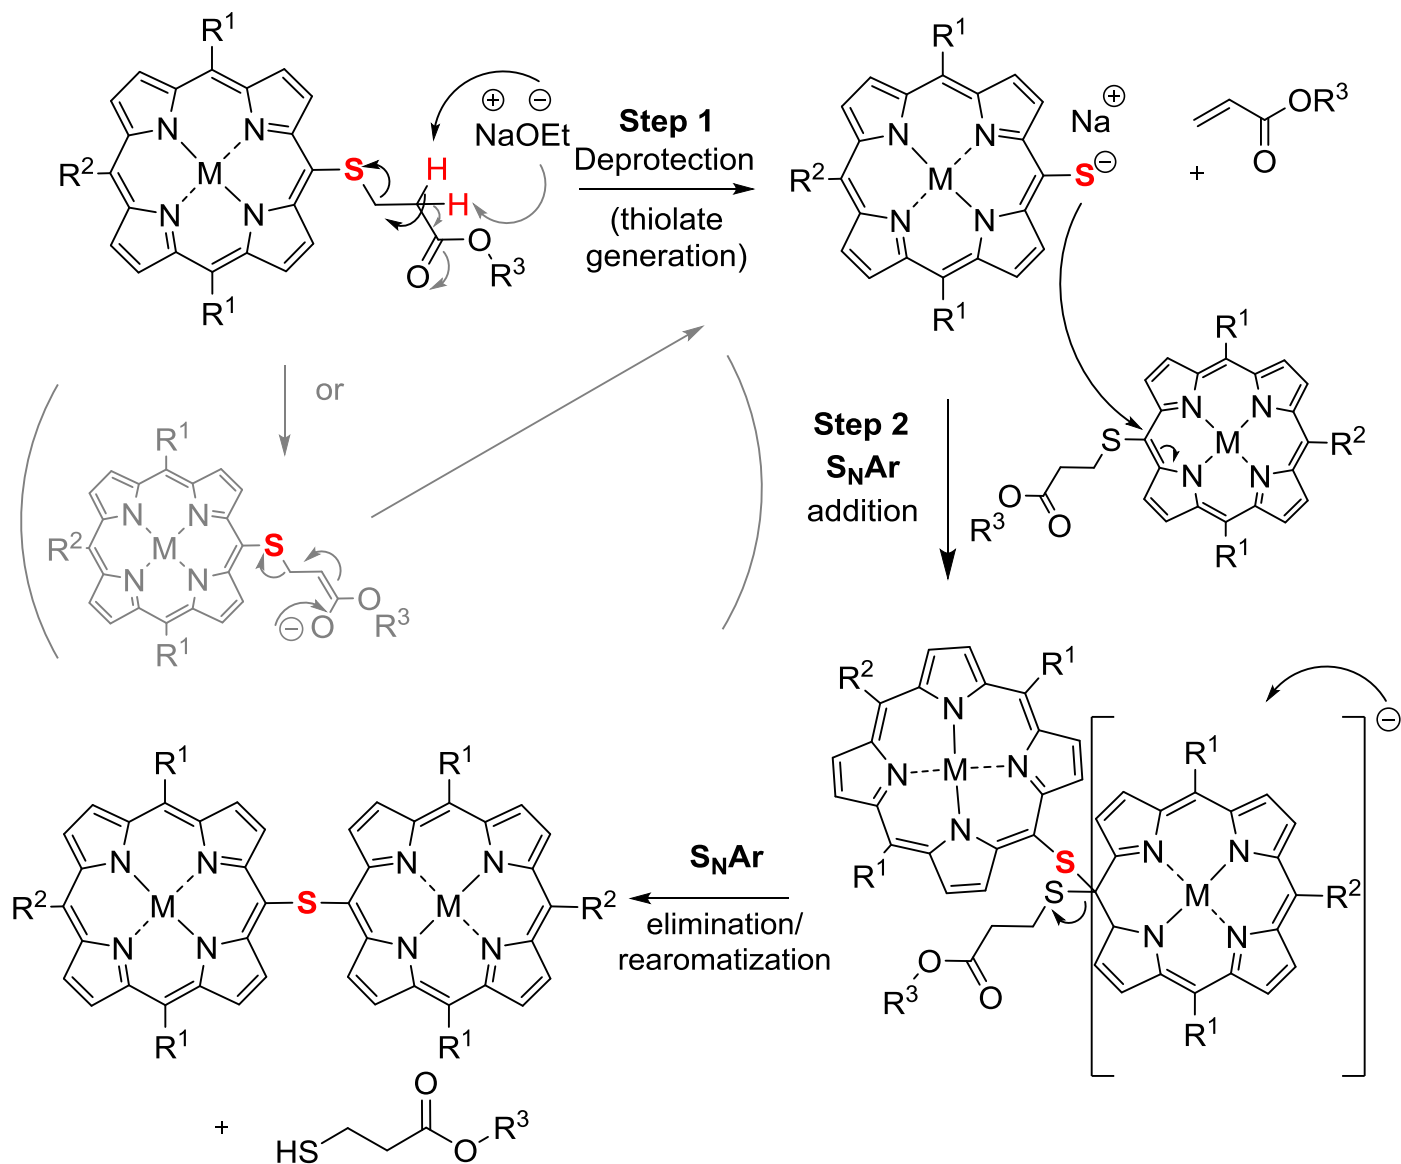

# Distinguishing between sulfide- and disulfide-linked bisporphyrins **3e** via HRMS and <sup>1</sup>H NMR

## Elemental Composition Report

### Single Mass Analysis

Tolerance = 10.0 PPM / DBE: min = -1.5, max = 100.0

Element prediction: Off

Number of isotope peaks used for i-FIT = 3

Monoisotopic Mass, Odd and Even Electron Ions

33 formula(e) evaluated with 1 results within limits (up to 50 closest results for each mass)

Elements Used:

C: 0-68 H: 0-50 N: 0-8 S: 0-2 Ni: 0-1

Aoife Ryan (MSe), AR717 in DCTB

Q-TOF20130228MF010 39 (0.720) AM (Cen,4, 80.00, Ht,10000.0,1570.68,0.70); Sm (SG, 5x5.00); Sb (15,10.00); Cm (24:88-(38:40+68:73))

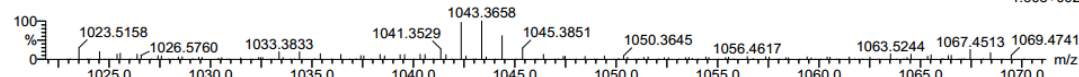

Minimum: -1.5  
Maximum: 5.0 10.0 100.0

| Mass      | Calc. Mass | mDa  | PPM  | DBE  | i-FIT | i-FIT (Norm) | Formula                                                       |
|-----------|------------|------|------|------|-------|--------------|---------------------------------------------------------------|
| 1042.3597 | 1042.3600  | -0.3 | -0.3 | 48.0 | 24.2  | 0.0          | C <sub>68</sub> H <sub>50</sub> N <sub>8</sub> S <sub>2</sub> |

## Elemental Composition Report

### Single Mass Analysis

Tolerance = 10.0 PPM / DBE: min = -1.5, max = 100.0

Element prediction: Off

Number of isotope peaks used for i-FIT = 3

Monoisotopic Mass, Odd and Even Electron Ions

25 formula(e) evaluated with 1 results within limits (up to 50 closest results for each mass)

Elements Used:

C: 0-68 H: 0-50 N: 0-8 S: 0-1 Ni: 0-1

Aoife Ryan (MSe), AR717 in DCTB

Q-TOF20130228MF010 39 (0.720) AM (Cen,4, 80.00, Ht,10000.0,1570.68,0.70); Sm (SG, 5x5.00); Sb (15,10.00); Cm (24:88-(38:40+68:73))

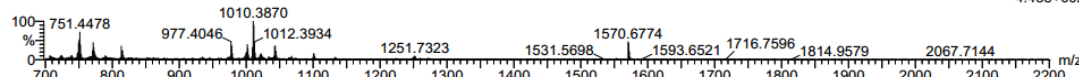

Minimum: -1.5  
Maximum: 5.0 10.0 100.0

| Mass      | Calc. Mass | mDa  | PPM  | DBE  | i-FIT | i-FIT (Norm) | Formula                                          |
|-----------|------------|------|------|------|-------|--------------|--------------------------------------------------|
| 1010.3870 | 1010.3879  | -0.9 | -0.9 | 48.0 | 23.2  | 0.0          | C <sub>68</sub> H <sub>50</sub> N <sub>8</sub> S |

Mass spectra of **3e**: mixture of disulfide (i) and sulfide (ii) linked porphyrins

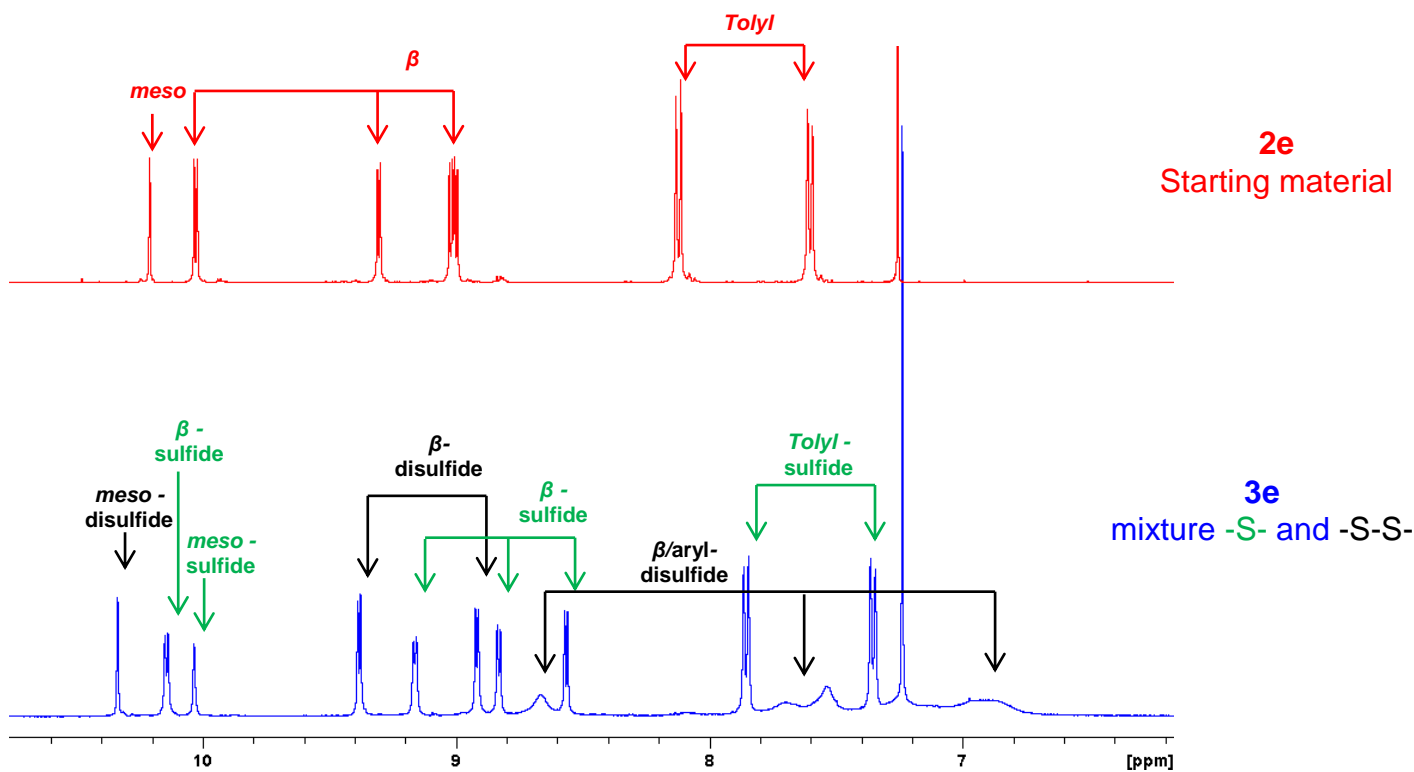

<sup>1</sup>H NMR of aromatic regions of **2e** (protected thiol) and **3e** (mixture of sulfide and disulfide linked porphyrins) in CDCl<sub>3</sub> (400 MHz)

Compound **3e** contains an inseparable mixture of sulfide and disulfide linked bisporphyrins. In order to prove the presence of both materials, the HRMS and  $^1\text{H}$  NMR spectra are presented on S-32. The parent ion peak at  $m/z$  1042.3597 represents the disulfide linked dimer, whilst that showing a parent ion peak at  $m/z$  1010.3870 indicates the sulfur linked dimer. Using  $^1\text{H}$  NMR analysis, a comparison with starting material **2e** is shown and complete consumption is observed. For S-linked dimer **3e**, one set of  $\beta$ -signals, integrating for 4 protons, appears at 10.1 ppm, downfield from the meso signal and this is a common trait observed for all S-linked dimer bearing a free meso position (see  $^1\text{H}$  NMR spectra of **3c** and **3f**). These reflect in inner  $\beta$ -protons and the opposite is observed for the disulfide linked dimer, whereby communication between the porphyrin units is less than that for the S-linked counterpart. Additionally, broad signals are observed for the aromatic signals in contrast to the S-linked dimer, whereby sharp signals were seen in all other compounds.

### Crystal data for sulphur-linked bisporphyrin **3b**

*Crystal data:*  $\text{C}_{79}\text{H}_{52}\text{N}_8\text{O}_2\text{SZn}_2 \cdot 0.5\text{CH}_3\text{OH}$ ,  $M = 1326.12$ , triclinic, space group  $P\bar{1}$ ,  $a = 12.2362(6)$ ,  $b = 15.0184(7)$ ,  $c = 17.9322(9)$  Å,  $\alpha = 99.999(2)^\circ$ ,  $\beta = 103.404(1)^\circ$ ,  $\gamma = 93.376(1)^\circ$ ,  $V = 3140.0(3)$  Å<sup>3</sup>,  $Z = 2$ ,  $T = 104$  K,  $\mu$  (MoK $\alpha$ ) = 0.856 cm<sup>-1</sup>, 26768 reflections measured, 10863 unique reflections measured ( $R_{\text{int}} = 0.025$ ), 875 parameters, 8742 reflections with  $I > 2.0\sigma(I)$ , refinement against  $|F^2|$ ,  $R_1(I > 2.0 \sigma(I)) = 0.0855$ ,  $wR_2$  (all data) = 0.2226,  $S = 1.05$ ,  $\rho_{\text{max}} = 5.99$ . The structure shows disorder of one axial methanol and one phenyl residue, both of which were refined with 50 % occupancy. A methanol of solvation was refined with 50 % occupancy. The residual electron density is located close to the S atom (0.8 Å). CCDC 951823.
